# Supplementary material for: Proteomic atlas of peritoneal tissue: sampling the “soil” for the metastatic seed in carcinomatosis
Source: Research Square preprint supplement (doi:10.21203/rs.3.rs-6822087/v1), 2025-07-24
Supplement: Supplementary file 1 [file 7803a07f08bd39f894c28cd9.xlsx]

## Sheet: Identified proteins
Protein ID	Protein name	Gene name	Intensity IPI_F10	Intensity IPI_F11	Intensity IPI_F13	Intensity IPI_F16	Intensity IPI_F17	Intensity IPI_F23	Intensity IPI_F26	Intensity IPI_F28	Intensity IPI_F3	Intensity IPI_F31	Intensity IPI_F32	Intensity IPI_F33	Intensity IPI_F36	Intensity IPI_F38	Intensity IPI_F4	Intensity IPI_F44	Intensity IPI_F45	Intensity IPI_F50	Intensity IPI_F51	Intensity IPI_F53	Intensity IPI_F55	Intensity IPI_F58	Intensity IPI_F59	Intensity IPI_F60	Intensity IPI_F61	Intensity IPI_F62	Intensity IPI_F64	Intensity IPI_F65	Intensity IPI_F66	Intensity IPI_F67	Intensity IPI_F68	Intensity IPI_F69	Intensity IPI_F73	Intensity IPI_F74	Intensity IPI_F75	Intensity IPI_F76	Intensity IPI_F77	Intensity IPI_F81	Intensity IPI_F84	Intensity IPI_F85	Intensity IPI_F87	Intensity IPI_F88	Intensity IPI_F89	Intensity IPI_Tissue103	Intensity IPI_Tissue104	Intensity IPI_Tissue105	Intensity IPI_Tissue108
P80748	Immunoglobulin lambda variable 3-21	IGLV3-21	0	0	0	0	0	0	0	0	0	0	0	0	0	0	0	0	0	0	0	0	0	0	0	0	0	0	0	0	0	0	0	0	0	0	0	0	0	0	0	0	0	0	0	101420	0	0	0
P01614	Immunoglobulin kappa variable 2D-40	IGKV2D-40	0	0	0	0	0	0	0	0	0	0	0	0	0	0	0	0	0	0	0	0	0	0	0	0	0	0	0	0	0	0	0	0	0	0	0	0	0	0	0	0	0	0	0	615400	32517	929860	45953
P01825	Immunoglobulin heavy variable 4-59	IGHV4-59	0	0	0	0	0	0	0	0	0	0	0	0	0	0	0	0	0	0	0	0	0	0	0	0	0	0	0	0	0	0	0	0	0	0	0	0	0	0	0	0	0	0	0	0	0	147640	0
A0A0B4J1V0	Immunoglobulin heavy variable 3-15	IGHV3-15	0	0	0	0	0	0	0	0	0	0	0	0	0	0	0	0	0	0	0	0	0	0	0	0	0	0	0	0	0	0	0	0	0	0	0	0	0	0	0	0	0	0	0	0	0	72075	0
A0A0B4J1X5	Immunoglobulin heavy variable 3-74	IGHV3-74	0	0	0	0	0	0	0	0	0	0	0	0	0	0	0	0	0	0	0	0	0	0	0	0	0	0	0	0	0	0	0	0	0	0	0	0	0	0	0	0	0	0	0	42883	0	0	0
A0A0B4J2B5	Immunoglobulin heavy variable 3-9	IGHV3OR16-9	0	0	0	0	0	0	0	0	0	0	0	0	0	0	0	0	0	0	0	0	0	0	0	0	0	0	0	0	35789	0	0	0	0	0	0	0	0	0	0	0	0	0	0	515250	48280	280210	442190
P0DPI2	Glutamine amidotransferase-like class 1 domain-containing protein 3, mitochondrial	GATD3	0	0	0	0	0	0	0	0	0	0	0	0	0	0	0	0	0	0	0	0	0	0	0	0	0	0	0	0	0	0	0	0	0	0	0	0	0	0	0	0	0	0	0	0	0	27502	0
A0A0C4DH31	Immunoglobulin heavy variable 1-18	IGHV1-18	0	0	0	0	0	0	0	0	0	0	0	0	0	0	0	0	0	0	0	0	0	0	0	0	0	0	0	0	0	0	0	0	0	0	0	0	0	0	0	0	0	0	0	0	0	49741	0
A0A0C4DH68	Immunoglobulin kappa variable 2-24	IGKV2-24	0	0	0	0	0	0	0	0	0	0	0	0	0	0	0	0	0	0	0	0	0	0	0	0	0	0	0	0	0	0	0	0	0	0	0	0	0	0	0	0	0	0	0	154540	0	0	0
A6NHL2	Tubulin alpha chain-like 3	TUBAL3	0	0	0	0	0	0	0	0	0	0	0	0	0	0	0	0	0	0	0	0	0	0	0	0	0	0	0	0	84570	57551	0	0	0	0	0	0	0	0	0	0	0	0	0	0	0	0	0
A6NMZ7	Collagen alpha-6(VI) chain	COL6A6	0	0	0	0	0	0	0	0	0	0	0	0	0	0	0	0	0	0	0	0	0	0	0	0	0	0	0	0	0	0	22835	0	0	0	0	10044	0	0	0	0	0	0	0	173240	35930	0	138920
A8K2U0	Alpha-2-macroglobulin-like protein 1	A2ML1	0	0	0	0	0	114430	251640	276750	0	458880	253880	106600	187950	395430	0	0	134130	476890	247270	43629	183450	0	0	0	0	238050	0	416940	1950000	7871000	1878200	175020	126660	114400	60054	61191	316890	0	75927	85631	0	54473	0	0	0	0	0
P62308	Small nuclear ribonucleoprotein G	SNRPG	0	0	0	0	0	0	0	0	0	0	0	0	0	0	0	0	0	0	0	0	0	0	0	0	0	0	0	0	104790	0	0	0	0	0	0	0	0	0	0	0	0	0	0	0	0	43304	0
P07910	Heterogeneous nuclear ribonucleoproteins C1/C2	HNRNPC	0	0	0	0	0	0	0	0	0	0	0	0	0	0	0	0	0	0	0	0	0	0	0	0	0	0	0	0	0	42622	0	0	0	0	0	0	0	0	0	0	0	0	0	71158	0	0	0
B3EWG6	Protein FAM25G	FAM25G	0	0	0	0	0	0	0	0	0	0	0	0	0	0	0	0	0	0	0	0	0	0	0	0	0	0	0	0	137990	83375	0	0	0	0	0	0	0	0	0	0	0	0	0	0	0	0	0
B9A064	Immunoglobulin lambda-like polypeptide 5	IGLL5	0	0	0	0	0	0	0	0	0	0	0	0	0	0	0	0	0	0	0	0	0	0	0	0	0	0	0	0	0	0	0	0	0	0	0	0	0	0	0	0	0	0	0	442280	27008	384640	361150
E9PAV3	Nascent polypeptide-associated complex subunit alpha, muscle-specific form	NACA	0	0	0	0	0	0	0	0	0	0	0	0	0	0	0	0	0	0	0	0	0	0	0	0	0	0	0	0	25392	599110	0	0	0	0	0	0	0	0	0	0	0	0	0	64735	0	423520	144220
O00148	ATP-dependent RNA helicase DDX39A	DDX39A	0	0	0	0	0	0	0	0	0	0	0	0	0	0	0	0	0	0	0	0	0	0	0	0	0	0	0	0	0	0	0	0	0	0	0	0	0	0	0	0	0	0	0	103060	0	0	0
O00151	PDZ and LIM domain protein 1	PDLIM1	0	0	0	0	0	0	0	0	0	0	0	0	0	0	0	0	0	0	0	0	0	0	0	0	0	0	0	0	0	0	0	0	0	0	0	0	0	0	0	0	0	0	0	0	0	238720	0
O00159	Unconventional myosin-Ic	MYO1C	0	0	0	0	0	0	0	0	0	0	0	0	0	0	0	0	0	0	0	0	0	0	0	226880	110410	64515	77706	0	259740	26301	33414	111660	0	0	48254	0	14176	0	0	0	0	0	0	292260	23993	301850	2203500
O00204	Sulfotransferase 2B1	SULT2B1	0	0	0	0	0	0	0	0	0	0	0	0	0	0	0	0	0	0	0	0	0	0	0	0	0	0	0	0	403800	501640	0	0	0	0	0	0	0	0	0	0	0	0	0	0	0	0	0
O00231	26S proteasome non-ATPase regulatory subunit 11	PSMD11	0	0	0	0	0	0	0	0	0	0	0	0	0	0	0	0	0	0	0	0	0	0	0	0	0	0	0	0	0	35363	0	0	0	0	0	0	0	0	0	0	0	0	0	0	0	0	0
O00299	Chloride intracellular channel protein 1	CLIC1	0	0	0	0	0	0	0	0	0	0	0	0	0	0	0	0	0	0	0	0	0	0	0	41252	0	0	0	0	492100	192680	0	0	0	0	0	0	0	0	0	0	0	0	0	160140	39344	128560	292090
O00571	ATP-dependent RNA helicase DDX3X	DDX3X	0	0	0	0	0	0	0	0	0	0	0	0	0	0	0	0	0	0	0	0	0	0	0	0	0	0	0	0	0	94231	0	0	0	0	0	0	0	0	0	0	0	0	0	0	0	0	0
O00754	Lysosomal alpha-mannosidase	MAN2B1	0	0	0	0	0	0	0	0	0	0	0	0	0	0	0	0	0	0	0	0	0	0	0	0	0	0	0	0	30753	0	0	0	0	0	0	0	0	0	0	0	0	0	0	0	0	0	0
O00757	Fructose-1,6-bisphosphatase isozyme 2	FBP2	0	0	0	0	0	0	0	0	0	0	0	0	0	0	0	315360	0	0	0	0	0	0	0	0	0	0	0	0	0	0	0	0	0	0	0	0	0	0	0	0	0	0	0	0	0	0	0
O00763	Acetyl-CoA carboxylase 2	ACACB	0	0	0	0	0	0	0	0	0	0	0	0	0	0	0	0	0	0	0	0	0	0	0	0	0	0	0	0	0	0	0	0	0	0	0	0	0	0	0	0	0	0	0	0	0	0	0
O00764	Pyridoxal kinase	PDXK	0	0	0	0	0	0	0	0	0	0	0	0	0	0	0	0	0	0	0	0	0	0	0	0	0	0	0	0	0	0	0	0	0	0	0	0	0	0	0	0	0	0	0	0	0	0	0
O14531	Dihydropyrimidinase-related protein 4	DPYSL4	0	0	0	0	0	0	0	0	0	0	0	0	0	0	0	0	0	0	0	0	0	0	0	0	0	0	0	0	0	0	0	0	0	0	0	0	0	0	0	0	0	0	0	0	0	64960	0
O14558	Heat shock protein beta-6	HSPB6	0	0	0	0	0	0	0	0	0	0	0	0	0	0	0	22455	0	0	0	0	0	0	0	0	0	0	0	0	0	0	0	0	0	0	0	0	0	0	0	0	0	0	0	0	0	36412	0
O14732	Inositol monophosphatase 2	IMPA2	0	0	0	0	0	0	0	9957	0	0	0	0	0	0	0	0	0	0	0	0	0	0	0	0	0	0	0	0	121980	0	0	0	0	31155	0	0	45143	0	0	0	0	0	0	0	0	0	0
O14773	Tripeptidyl-peptidase 1	TPP1	0	0	0	0	0	0	0	29310	0	182760	33390	18272	61757	107560	0	0	0	137490	114580	0	0	24431	39020	0	0	29609	245100	41659	618140	0	0	52511	51700	0	0	23111	0	0	12392	22457	0	0	0	0	0	122280	0
O14818	Proteasome subunit alpha type-7	PSMA7	0	0	0	0	0	0	27147	21703	0	114260	61556	0	122230	160580	0	0	0	0	45649	0	0	17615	9070.4	0	0	0	31763	86142	2145000	489180	0	64093	34711	0	0	33708	61749	0	0	53056	0	0	0	0	0	141290	80881
O14880	Glutathione S-transferase 3, mitochondrial	MGST3	0	0	0	0	0	0	0	0	0	0	0	0	0	0	0	0	0	0	0	0	0	0	0	26480	32463	0	0	0	63022	0	74312	0	0	0	130070	0	0	0	0	0	0	0	0	0	0	0	450420
O14907	Tax1-binding protein 3	TAX1BP3	0	0	0	0	0	0	0	0	0	0	0	0	0	0	0	0	0	0	0	0	0	0	0	0	0	0	0	0	0	0	0	0	0	0	0	0	0	0	0	0	0	0	0	0	0	0	104540
P19105	Myosin regulatory light chain 12A	MYL12A	0	0	0	0	0	0	0	0	0	0	0	0	0	0	0	0	0	0	0	0	0	0	0	0	0	0	0	0	33963	26514	0	0	0	0	0	0	0	0	0	0	0	0	0	0	0	435500	417920
O14983	Sarcoplasmic/endoplasmic reticulum calcium ATPase 1	ATP2A1	0	0	0	0	0	0	0	0	0	0	0	0	0	0	0	16617000	0	0	0	0	393960	292040	0	201580	0	575660	0	0	0	0	0	0	0	0	4291400	0	0	0	0	0	0	0	0	0	0	161550	193560
O15118	NPC intracellular cholesterol transporter 1	NPC1	0	0	0	0	0	0	0	0	0	0	0	0	0	0	0	0	0	0	0	0	0	0	0	0	0	0	0	0	111520	0	0	0	0	0	0	0	0	0	0	0	0	0	0	0	0	0	0
O15143	Actin-related protein 2/3 complex subunit 1B	ARPC1B	0	0	0	0	0	0	0	0	0	0	0	0	0	0	0	0	0	0	0	0	0	0	0	0	0	0	0	0	0	0	0	0	0	0	0	0	0	0	0	0	0	0	0	133460	0	0	0
O15144	Actin-related protein 2/3 complex subunit 2	ARPC2	0	0	0	0	0	0	0	0	0	0	0	0	0	0	0	0	0	0	0	0	0	0	0	0	0	0	0	0	0	157910	0	0	0	0	0	0	0	0	0	0	0	0	0	0	0	0	107110
O15145	Actin-related protein 2/3 complex subunit 3	ARPC3	0	0	0	0	0	0	0	0	0	0	0	0	0	0	0	0	0	0	0	0	0	0	0	0	0	0	0	0	0	117130	0	0	0	0	0	0	0	0	0	0	0	0	0	0	0	0	0
O15173	Membrane-associated progesterone receptor component 2	PGRMC2	0	0	0	0	0	0	0	0	0	0	0	0	0	0	0	0	0	0	0	0	0	0	0	0	0	0	0	0	100150	0	0	0	0	0	0	0	0	0	0	0	0	0	0	0	0	0	101550
O15230	Laminin subunit alpha-5	LAMA5	0	0	0	0	0	0	0	0	0	0	0	0	0	0	0	0	0	0	0	0	0	0	0	0	0	0	0	0	0	22438	0	0	0	0	0	0	0	0	0	0	0	0	0	0	0	0	12613
O15231	Zinc finger protein 185	ZNF185	0	0	0	0	0	0	0	0	0	0	0	0	0	0	0	0	0	0	0	0	0	0	0	0	0	0	0	0	0	24062	0	0	0	0	0	0	0	0	0	0	0	0	0	0	0	0	0
O15258	Protein RER1	RER1	0	0	0	0	0	0	0	0	0	0	0	0	0	0	0	0	0	0	0	0	0	0	0	0	0	0	0	0	0	0	0	0	0	0	0	0	0	0	0	0	0	0	0	0	0	104650	0
O15371	Eukaryotic translation initiation factor 3 subunit D	EIF3D	0	0	0	0	0	0	0	0	0	0	0	0	0	0	0	0	0	0	0	0	0	0	0	0	0	0	0	0	55936	0	0	0	0	0	0	0	0	0	0	0	0	0	0	0	0	0	0
O43175	D-3-phosphoglycerate dehydrogenase	PHGDH	0	0	0	0	0	0	0	0	0	0	0	0	0	0	0	0	0	0	0	0	0	0	0	0	0	0	0	0	0	0	0	0	0	0	0	0	0	0	0	0	0	0	0	118150	45821	0	0
O43240	Kallikrein-10	KLK10	0	0	0	0	0	0	0	0	0	0	0	0	50004	0	0	0	0	0	0	0	0	0	0	0	0	0	0	21654	923580	297180	20416	0	0	0	0	31302	0	0	0	0	0	0	0	0	0	0	0
O43242	26S proteasome non-ATPase regulatory subunit 3	PSMD3	0	0	0	0	0	0	0	0	0	0	0	0	0	0	0	0	0	0	0	0	0	0	0	0	0	0	0	0	0	0	0	0	0	0	0	0	0	0	0	0	0	0	0	21800	0	0	39844
O43301	Heat shock 70 kDa protein 12A	HSPA12A	0	0	0	0	0	0	0	0	0	0	0	0	0	0	0	0	0	0	0	0	0	0	0	0	0	0	0	0	0	0	0	0	0	0	0	0	0	0	0	0	0	0	0	13065	0	0	86754
O43390	Heterogeneous nuclear ribonucleoprotein R	HNRNPR	0	0	0	0	0	0	0	0	0	0	0	0	0	0	0	0	0	0	0	0	0	0	0	0	0	0	0	0	0	57478	0	0	0	0	0	0	0	0	0	0	0	0	0	76917	0	0	0
O43399	Tumor protein D54	TPD52L2	0	0	0	0	0	0	0	0	0	0	0	0	0	0	0	0	0	0	0	0	0	0	0	0	0	0	0	0	0	0	0	0	0	0	0	0	0	0	0	0	0	0	0	0	0	78781	0
O43422	52 kDa repressor of the inhibitor of the protein kinase	THAP12	0	0	0	0	0	0	0	0	0	0	0	77349	0	115120	0	107500	104090	0	57421	0	358160	0	0	0	0	0	0	0	0	0	0	0	82287	0	0	0	0	0	0	82597	0	0	65758	0	0	0	0
O43488	Aflatoxin B1 aldehyde reductase member 2	AKR7A2	0	0	0	0	0	0	0	0	0	0	0	0	0	0	0	0	0	0	0	0	0	0	0	0	0	0	0	0	0	0	0	0	0	0	0	0	0	0	0	0	0	0	0	0	0	80603	51623
O43491	Band 4.1-like protein 2	EPB41L2	0	0	0	0	0	0	0	0	0	0	0	0	0	0	0	0	0	0	0	0	0	0	0	0	0	0	0	0	0	0	0	0	0	0	0	0	0	0	0	0	0	0	0	111670	0	0	165580
O43548	Protein-glutamine gamma-glutamyltransferase 5	TGM5	0	0	0	0	0	0	60747	72116	0	171320	86972	0	42486	97272	0	0	0	75880	33006	0	0	0	0	0	0	0	87791	68717	36030	156230	25060	59762	0	0	0	27688	97958	0	0	0	0	0	0	0	0	0	0
O43707	Alpha-actinin-4	ACTN4	0	0	0	0	0	0	0	0	0	0	11028	0	0	0	0	184420	0	0	0	0	0	0	0	0	0	26672	0	0	1678900	1278200	0	0	0	0	0	0	0	0	0	0	0	0	0	315880	113360	545340	495610
O43852	Calumenin	CALU	0	0	0	0	0	0	0	0	0	0	0	0	0	0	0	0	0	0	0	0	0	0	0	0	0	0	0	0	0	0	0	0	0	0	0	0	0	0	0	0	0	0	0	0	0	236840	0
O60240	Perilipin-1	PLIN1	561410	0	0	0	0	0	0	0	0	0	0	0	0	0	0	0	0	0	0	0	0	0	0	276510	162850	0	369150	0	625590	0	1583300	340430	0	147100	0	472390	0	0	0	0	0	0	0	152970	74377	131730	4246900
O60437	Periplakin	PPL	0	0	0	0	0	0	0	0	0	0	331470	0	0	0	0	0	0	0	0	33616	0	0	0	0	0	0	0	108550	361910	1550600	0	0	0	0	0	0	0	0	0	0	0	0	0	0	0	0	0
O60610	Protein diaphanous homolog 1	DIAPH1	0	0	0	0	0	0	0	0	0	0	0	0	0	0	0	0	0	0	0	0	0	0	0	0	0	0	0	0	0	0	0	0	0	0	0	0	0	0	0	0	0	0	0	47026	0	0	0
O60662	Kelch-like protein 41	KLHL41	0	0	0	0	0	0	0	0	0	0	0	0	0	0	0	138100	0	0	0	0	0	0	0	0	0	0	0	0	0	0	0	0	0	0	0	0	0	0	0	0	0	0	0	0	0	0	0
O60664	Perilipin-3	PLIN3	0	0	0	0	0	0	0	0	0	0	0	0	0	0	0	0	0	0	0	0	0	0	0	0	0	0	0	0	0	0	0	0	0	0	0	0	0	0	0	0	0	0	0	0	0	337200	0
O60701	UDP-glucose 6-dehydrogenase	UGDH	0	0	0	0	0	0	0	0	0	0	0	0	0	0	0	0	0	0	0	0	0	0	0	0	0	0	0	0	0	31851	0	0	0	0	0	0	0	0	0	0	0	0	0	62910	0	164830	0
O60716	Catenin delta-1	CTNND1	0	0	0	0	0	0	0	0	0	0	0	0	0	0	0	0	0	0	0	0	0	0	0	0	0	0	0	0	0	49356	0	0	0	0	0	0	0	0	0	0	0	0	0	0	0	0	0
Q99880	Histone H2B type 1-L	H2BC13	0	0	1182800	0	0	0	0	0	0	0	231740	78293	692390	0	0	25740	0	0	0	0	57383	94785	402040	2296400	238030	1117000	865910	1167200	277660	1000100	494010	1807800	494010	174800	257750	1824300	124330	0	59600	0	120720	0	0	6481100	1087100	3629100	1013900
O60911	Cathepsin L2	CTSV	0	0	0	0	0	0	0	0	0	0	0	0	0	0	0	0	0	0	0	0	0	0	0	0	0	0	84502	0	2894200	0	0	0	0	0	0	0	0	0	0	0	0	0	0	0	0	0	0
O75083	WD repeat-containing protein 1	WDR1	0	0	0	0	0	0	0	0	0	0	0	0	0	0	0	0	0	0	0	0	0	0	0	0	0	0	0	0	52505	24728	0	0	0	0	0	0	0	0	0	0	0	0	0	229070	0	0	55798
O75112	LIM domain-binding protein 3	LDB3	0	0	0	0	0	0	0	0	0	0	0	0	0	0	0	940060	0	0	0	0	508470	47825	0	0	0	43007	0	0	0	0	0	0	0	0	792030	0	0	0	0	0	0	0	0	0	0	0	0
O75146	Huntingtin-interacting protein 1-related protein	HIP1R	0	0	0	0	0	0	0	0	0	0	0	0	0	0	0	0	0	0	0	0	0	0	0	0	0	0	0	0	94035	96434	0	0	0	0	0	0	0	0	0	0	0	0	0	0	0	0	0
O75223	Gamma-glutamylcyclotransferase	GGCT	0	0	0	0	0	148730	522660	331150	0	2369500	306110	185850	363640	817580	64909	436320	207680	835220	390500	161560	232630	331160	172640	600960	0	380880	1381100	1055400	2899300	5860800	887300	492210	280090	256620	0	489050	866290	54621	351630	189920	29595	91705	143550	0	0	0	0
O75306	NADH dehydrogenase [ubiquinone] iron-sulfur protein 2, mitochondrial	NDUFS2	0	0	0	0	0	0	0	0	0	0	0	0	0	0	0	0	0	0	0	0	0	0	0	0	0	0	0	0	0	0	0	0	0	0	0	0	0	0	0	0	0	0	0	0	20295	0	0
O75339	Cartilage intermediate layer protein 1	CILP	0	0	0	0	0	0	0	0	0	0	0	0	0	0	0	0	0	0	0	0	18253	0	0	793920	0	862840	0	0	0	0	0	0	0	0	173040	0	0	0	0	0	0	0	0	0	0	0	0
O75340	Programmed cell death protein 6	PDCD6	0	0	0	0	0	0	0	0	0	0	0	0	0	0	0	0	0	0	0	0	0	0	0	0	0	0	0	0	48305	132190	0	0	0	0	0	0	0	0	0	0	0	0	0	0	0	0	0
O75342	Arachidonate 12-lipoxygenase, 12R-type	ALOX12B	0	0	0	0	0	64303	59764	0	0	168790	12045	57210	126420	438100	0	0	126490	190830	294300	0	0	0	0	0	0	132370	65605	100020	334760	217480	21103	126810	85569	64725	25031	116680	183660	0	104650	34929	26765	46051	0	0	0	0	0
O75348	V-type proton ATPase subunit G 1	ATP6V1G1	0	0	0	0	0	0	0	0	0	0	0	0	0	0	0	0	0	0	0	0	0	0	0	0	0	0	0	0	139120	0	0	0	0	0	0	0	0	0	0	0	0	0	0	0	0	69768	0
O75367	Core histone macro-H2A.1	MACROH2A1	0	0	0	0	0	0	0	0	0	0	0	0	0	0	0	0	0	0	0	0	0	0	0	0	0	0	0	0	0	0	0	0	0	0	0	0	0	0	0	0	0	0	0	318490	173530	49380	43071
O75369	Filamin-B	FLNB	0	0	0	0	0	0	13571	0	0	0	0	0	0	0	0	0	0	0	0	0	0	0	0	0	0	0	0	43906	351540	293850	0	0	0	0	0	0	19141	0	0	0	0	0	0	202950	0	38350	132550
O75390	Citrate synthase, mitochondrial	CS	0	0	0	0	0	0	0	0	0	0	0	0	0	0	0	46455	0	0	0	0	0	0	0	0	0	0	0	0	0	143730	0	0	0	0	0	0	0	0	0	0	0	0	0	0	0	0	110240
O75396	Vesicle-trafficking protein SEC22b	SEC22B	0	0	0	0	0	0	0	0	0	0	0	0	0	0	0	0	0	0	0	0	0	0	0	0	0	0	0	0	56683	0	0	0	0	0	0	0	0	0	0	0	0	0	0	0	0	84685	0
O75436	Vacuolar protein sorting-associated protein 26A	VPS26A	0	0	0	0	0	0	0	0	0	0	0	0	0	0	0	0	0	0	0	0	0	0	0	0	0	0	0	0	64706	0	0	0	0	0	0	0	0	0	0	0	0	0	0	33893	0	0	0
O75629	Protein CREG1	CREG1	0	0	0	0	0	0	0	0	0	34025	15128	0	24376	13390	0	16973	0	101810	36722	0	0	0	0	0	0	42783	63249	0	2378100	148150	285420	36639	21549	30985	0	43404	47193	0	20529	14684	0	0	0	0	0	0	0
O75635	Serpin B7	SERPINB7	0	0	0	0	0	134270	243190	38602	0	212470	43534	0	140990	239510	0	0	26529	124410	85190	39677	0	62797	33544	0	0	20522	131640	350300	454460	196390	100080	56586	121950	77547	0	44107	325070	0	45135	0	0	0	0	0	0	0	0
O75712	Gap junction beta-3 protein	GJB3	0	0	0	0	0	0	0	0	0	0	0	0	0	0	0	0	0	0	0	0	0	0	0	0	0	0	0	0	49025	0	0	0	0	0	0	0	0	0	0	0	0	0	0	0	0	0	0
O75781	Paralemmin-1	PALM	0	0	0	0	0	0	0	0	0	0	0	0	0	0	0	0	0	0	0	0	0	0	0	0	0	0	0	0	0	0	0	0	0	0	0	0	0	0	0	0	0	0	0	0	0	0	70031
O75787	Renin receptor	ATP6AP2	0	0	0	0	0	0	0	0	0	0	0	0	0	0	0	0	0	0	0	0	0	0	0	0	0	0	0	0	53711	0	0	0	0	0	0	0	0	0	0	0	0	0	0	0	0	0	0
O75874	Isocitrate dehydrogenase [NADP] cytoplasmic	IDH1	0	0	0	0	0	0	0	0	0	0	0	0	0	0	0	0	0	0	0	0	0	0	0	0	0	0	29342	0	45452	0	293320	0	0	0	0	0	0	0	0	0	0	0	0	23120	74340	621420	431550
O75955	Flotillin-1	FLOT1	0	0	0	0	0	0	0	0	0	0	0	0	0	0	0	0	0	0	0	0	0	0	0	0	0	0	0	0	0	0	0	0	0	0	0	0	0	0	0	0	0	0	0	0	0	60863	0
O76027	Annexin A9	ANXA9	0	0	0	0	0	0	0	0	0	0	0	0	0	0	0	0	0	0	0	0	0	0	0	0	0	0	0	0	0	257980	0	0	0	0	0	0	0	0	0	0	0	0	0	0	0	0	0
O94759	Transient receptor potential cation channel subfamily M member 2	TRPM2	0	0	0	0	0	0	0	0	0	0	0	0	0	0	0	0	0	0	0	0	0	0	0	0	0	0	0	0	0	0	0	0	0	0	63281	0	0	0	0	0	0	0	0	0	0	0	0
O94905	Erlin-2	ERLIN2	0	0	0	0	0	0	0	0	0	0	0	0	0	0	0	0	0	0	0	0	0	0	0	0	0	0	0	0	0	0	0	0	0	0	0	0	0	0	0	0	0	0	0	153510	0	0	0
O95197	Reticulon-3	RTN3	0	0	0	0	0	0	0	0	0	0	0	0	0	0	0	0	0	0	0	0	0	0	0	0	0	0	0	0	0	0	0	0	0	0	0	0	0	0	0	0	0	0	0	202400	53949	0	250950
O95202	Mitochondrial proton/calcium exchanger protein	LETM1	0	0	0	0	0	0	0	0	0	0	0	0	0	0	0	0	0	0	0	0	0	0	0	0	0	0	0	0	0	0	0	0	0	0	0	0	0	0	0	0	0	0	0	0	0	0	29905
O95294	RasGAP-activating-like protein 1	RASAL1	0	0	0	0	0	0	0	0	0	0	0	0	0	0	0	0	0	0	0	0	0	0	0	0	0	0	0	0	6848.6	0	0	0	0	0	0	0	0	0	0	0	0	0	0	0	0	0	0
O95336	6-phosphogluconolactonase	PGLS	0	0	0	0	0	0	0	0	0	0	0	0	0	0	0	0	0	0	0	0	0	0	0	0	0	0	0	0	0	0	0	0	0	0	0	0	0	0	0	0	0	0	0	0	0	33893	0
O95747	Serine/threonine-protein kinase OSR1	OXSR1	0	0	0	0	0	0	0	0	0	0	0	0	0	0	0	0	0	0	0	0	0	0	0	0	0	0	0	0	0	0	0	0	0	0	0	0	0	0	0	0	0	0	0	0	0	50870	0
O95810	Caveolae-associated protein 2	CAVIN2	0	0	0	0	0	0	0	0	0	0	0	0	0	0	0	0	0	0	0	0	0	0	0	0	0	0	0	0	0	0	0	0	0	0	0	0	0	0	0	0	0	0	0	66198	0	51384	57484
O95817	BAG family molecular chaperone regulator 3	BAG3	0	0	0	0	0	0	0	0	0	0	0	0	0	0	0	0	0	0	0	0	0	0	0	0	0	0	0	0	0	43303	0	0	0	0	0	0	0	0	0	0	0	0	0	0	0	0	0
O95833	Chloride intracellular channel protein 3	CLIC3	0	0	0	0	0	0	0	0	0	0	0	0	0	0	0	0	0	0	0	0	0	0	0	0	0	0	0	0	0	189380	0	0	0	0	0	0	0	0	0	0	0	0	0	0	0	0	0
O95865	Putative hydrolase DDAH2	DDAH2	0	0	0	0	0	0	0	0	0	0	0	0	0	0	0	0	0	0	0	0	0	0	0	0	0	0	0	0	0	0	0	0	0	0	0	0	0	0	0	0	0	0	0	0	0	72575	0
O95994	Anterior gradient protein 2 homolog	AGR2	0	0	0	0	0	0	0	0	0	0	0	0	0	0	0	0	0	0	0	0	0	0	0	0	0	0	0	0	204440	0	0	0	0	0	0	0	0	0	0	0	0	0	0	0	0	0	0
P00325	All-trans-retinol dehydrogenase [NAD(+)] ADH1B	ADH1B	0	0	0	0	0	0	0	0	0	0	0	0	0	0	0	0	0	0	0	0	0	0	0	0	0	0	23476	0	0	0	0	0	0	0	0	0	0	0	0	0	0	0	0	5450600	2017300	370760	1460100
P00338	L-lactate dehydrogenase A chain	LDHA	0	0	0	0	0	0	31778	30609	0	0	129960	0	131640	255420	0	4760000	0	0	0	0	448970	0	0	189740	41394	124550	0	186870	225600	2126700	333510	0	0	0	402480	0	16355	0	0	0	0	0	0	685550	450820	241330	305750
P00352	Aldehyde dehydrogenase 1A1	ALDH1A1	0	0	0	0	0	0	0	0	0	0	0	0	0	0	0	0	0	0	0	0	0	0	0	45535	0	30730	0	0	0	35434	26436	0	0	0	0	32591	0	0	0	0	0	0	0	872260	419880	889280	745550
P00367	Glutamate dehydrogenase 1, mitochondrial	GLUD1	0	0	0	0	0	0	0	0	0	0	0	0	0	0	0	0	0	0	0	0	0	0	0	0	0	0	0	0	0	0	0	0	0	0	0	0	0	0	0	0	0	0	0	0	0	15790	0
P00387	NADH-cytochrome b5 reductase 3	CYB5R3	0	0	0	0	0	0	0	0	0	0	0	0	0	0	0	0	0	0	0	0	0	0	0	0	0	0	0	0	33798	0	0	0	0	0	0	0	0	0	0	0	0	0	0	66087	0	77476	511080
P00390	Glutathione reductase, mitochondrial	GSR	0	0	0	0	0	0	0	0	0	0	0	0	0	0	0	0	0	0	0	0	0	0	0	0	0	0	0	0	0	0	0	0	0	0	0	0	0	0	0	0	0	0	0	51287	0	0	0
P00395	Cytochrome c oxidase subunit 1	MT-CO1	0	0	0	0	0	0	0	0	0	0	0	0	0	0	0	0	0	0	0	0	20404	0	0	0	0	0	0	0	0	0	0	0	0	0	25212	0	0	0	0	0	0	0	0	0	0	0	0
P00403	Cytochrome c oxidase subunit 2	MT-CO2	0	0	0	0	0	0	0	0	0	0	0	0	0	0	0	0	0	0	0	0	0	0	0	0	0	0	0	0	0	0	0	0	0	0	0	0	0	0	0	0	0	0	0	0	0	0	0
P00441	Superoxide dismutase [Cu-Zn]	SOD1	0	0	0	0	0	91279	87794	0	0	19636	0	26250	76564	86260	0	0	0	66021	56883	0	33112	0	0	0	0	0	287910	35143	548050	45802	46905	0	0	41068	0	0	0	0	0	37697	0	0	0	66363	49076	0	124950
P00450	Ceruloplasmin	CP	0	0	0	0	0	0	0	0	0	0	0	0	0	0	0	0	0	0	0	0	0	0	0	0	0	0	0	0	0	0	0	0	0	0	0	0	0	0	0	0	0	0	0	1168400	967080	1550800	223520
P00488	Coagulation factor XIII A chain	F13A1	0	0	0	0	0	0	0	0	0	0	0	0	0	0	0	0	0	0	0	0	0	0	0	0	0	0	0	0	0	0	0	0	0	0	0	0	0	0	0	0	0	0	0	415600	33704	4696300	709060
P00491	Purine nucleoside phosphorylase	PNP	0	0	0	0	0	63310	98912	271070	5995.3	230710	105590	22559	283660	146140	0	0	0	27924	119110	0	0	0	0	0	0	0	209840	241400	2253900	1470100	0	74029	57728	0	0	0	170830	0	0	0	0	0	0	28306	0	0	0
P00505	Aspartate aminotransferase, mitochondrial	GOT2	0	0	0	0	0	0	0	0	0	0	0	0	0	0	0	0	0	0	0	0	100010	248570	0	0	0	0	0	0	169710	54788	90715	0	0	0	19069	0	0	0	0	0	0	0	0	39654	0	51462	0
P00558	Phosphoglycerate kinase 1	PGK1	0	0	0	0	0	0	0	60390	0	0	74917	0	100090	44706	0	3558600	0	0	0	0	0	0	0	38798	0	0	0	38405	436780	1325700	15804	0	0	0	15929	19601	61708	0	0	0	0	0	0	1440800	521380	356130	241510
P00568	Adenylate kinase isoenzyme 1	AK1	0	0	0	0	0	0	0	0	0	0	0	0	0	0	0	1706500	0	0	0	0	75807	8304.5	0	0	0	20127	0	0	67748	0	0	0	0	0	175240	0	0	0	0	0	0	0	0	19920	55669	90269	0
P00738	Haptoglobin	HP	0	0	0	0	0	0	0	0	0	0	0	0	114370	0	0	0	0	0	0	0	0	0	0	0	137780	0	0	0	0	0	0	0	0	0	0	0	0	0	0	0	0	0	0	2076400	1244300	13410000	537880
P00746	Complement factor D	CFD	0	0	0	0	0	0	0	0	0	0	0	0	0	0	0	0	0	0	0	0	0	0	0	0	0	0	0	0	0	0	0	0	0	0	0	0	0	0	0	0	0	0	0	113020	0	0	0
P00747	Plasminogen	PLG	0	0	0	0	0	0	0	0	0	0	0	0	0	0	0	0	0	0	0	0	0	0	0	0	0	0	0	0	0	0	0	0	0	0	0	0	0	0	0	0	0	0	0	47540	0	0	0
P00751	Complement factor B	CFB	0	0	0	0	0	0	0	0	0	0	0	0	0	0	0	0	0	0	0	0	0	0	0	0	0	0	0	0	0	0	0	0	0	0	0	0	0	0	0	0	0	0	0	708630	403540	1769000	246470
P00915	Carbonic anhydrase 1	CA1	0	0	0	0	0	0	0	0	0	0	0	0	0	0	0	0	0	0	0	0	0	0	0	0	430930	0	0	0	0	0	0	0	0	0	0	0	0	0	0	0	0	0	0	7890100	5161600	6136800	6936200
P00918	Carbonic anhydrase 2	CA2	0	0	0	0	0	0	0	0	0	0	0	0	0	0	0	0	0	0	0	0	0	0	0	0	0	0	0	0	0	0	0	0	0	0	0	0	0	0	0	0	0	0	0	1630900	1108200	277050	266440
P01008	Antithrombin-III	SERPINC1	0	0	0	0	0	0	0	0	0	0	0	0	0	0	0	0	0	0	0	0	0	0	0	0	0	0	0	0	0	0	0	0	0	0	0	0	0	0	0	0	0	0	0	1159400	207010	1679000	1196200
P01009	Alpha-1-antitrypsin	SERPINA1	0	0	0	0	0	0	21624	0	0	0	0	0	255890	0	0	113880	0	75670	0	0	0	0	0	277320	244890	0	0	0	32514	0	0	0	0	0	0	0	0	0	0	0	0	0	0	10709000	10138000	46517000	10849000
P01011	Alpha-1-antichymotrypsin	SERPINA3	0	0	0	0	0	0	0	0	0	0	0	0	0	0	0	0	0	0	0	0	0	0	0	50268	0	0	0	0	736900	0	0	0	0	0	0	0	0	0	0	0	0	0	0	363900	437730	8237800	1958700
P01019	Angiotensinogen	AGT	0	0	0	0	0	0	0	0	0	0	0	0	0	0	0	0	0	0	0	0	0	0	0	0	0	0	0	0	0	0	0	0	0	0	0	0	0	0	0	0	0	0	0	468550	68484	17753	0
P01023	Alpha-2-macroglobulin	A2M	0	0	234000	0	0	0	0	0	0	0	0	0	0	0	0	0	0	0	0	0	0	0	18789	51389	579160	0	15883	0	56142	35637	17201	0	0	0	26117	76885	0	0	0	0	0	0	0	5667900	1474300	8909800	7527600
P01024	Complement C3	C3	0	0	97512	0	0	0	0	0	73202	0	0	0	0	0	0	0	0	0	0	0	0	0	167740	300000	634670	577340	0	389570	262780	699730	78360	0	21566	37486	0	558320	0	0	0	0	0	0	0	7237700	2135000	48073000	15593000
P01031	Complement C5	C5	0	0	0	0	0	0	0	0	0	0	0	0	0	0	0	0	0	0	0	0	0	0	0	0	0	0	0	0	0	0	0	0	0	0	0	0	0	0	0	0	0	0	0	0	0	316330	0
P01036	Cystatin-S	CST4	0	0	0	0	0	0	0	0	0	0	0	0	0	0	0	408270	0	0	89895	33420	0	30619	0	0	0	0	0	538070	0	0	0	24285	0	0	0	0	0	0	0	0	0	17197	0	0	0	0	0
P01040	Cystatin-A	CSTA	335440	259540	0	192750	43616	3593000	8126500	3786800	444550	3515100	2464300	1721800	3694700	3460000	106990	1438300	2142900	3435500	2347500	1108800	1237800	2136800	1884000	918510	598070	2205300	8211100	6049000	22082000	24254000	2778900	2424400	2954100	1710400	903270	3683400	7251800	578730	1717900	1781900	327100	629140	696470	0	0	0	0
P01042	Kininogen-1	KNG1	0	0	0	0	0	0	0	0	0	0	0	0	0	0	0	0	0	0	0	0	0	0	0	0	59753	0	0	0	0	0	0	0	0	0	0	0	0	0	0	0	0	0	0	442290	135460	0	0
P01591	Immunoglobulin J chain	JCHAIN	0	0	0	0	0	0	0	18473	0	0	0	41388	496360	76737	0	143670	0	41456	69060	83294	0	0	26923	0	0	0	44847	0	0	0	0	0	0	0	0	0	14457	20953	0	0	0	25446	0	0	0	0	0
P01619	Immunoglobulin kappa variable 3-20	IGKV3-20	0	15984	0	0	0	0	0	0	0	0	0	0	66470	0	0	0	0	0	0	0	0	0	171100	409670	108080	0	50229	0	104670	0	75734	161680	0	0	0	106190	0	0	0	0	0	0	0	324840	0	486710	241690
P01624	Immunoglobulin kappa variable 3-15	IGKV3-15	0	0	897700	0	0	0	0	0	0	0	0	0	64984	0	0	0	0	0	0	0	55277	0	238890	632140	355290	127090	81310	0	421820	184500	181100	241930	93596	0	0	103400	0	0	0	0	0	0	0	173580	106900	0	0
P01833	Polymeric immunoglobulin receptor	PIGR	0	0	0	0	0	0	0	0	32786	0	0	0	536380	0	0	0	0	0	0	0	0	0	0	0	0	0	0	0	0	0	41329	0	0	0	0	0	0	0	0	0	0	22524	0	0	0	0	0
P01834	Immunoglobulin kappa constant	IGKC	0	0	0	0	0	213450	452570	955890	21623	325850	408670	200040	2608300	404110	0	192900	67733	301430	357730	144640	127850	135250	831690	1465600	797860	183380	401000	1104500	1905100	1934100	1106900	813770	355150	383010	27505	1321200	279610	103870	134160	75765	0	88760	64704	22792000	12999000	62471000	18484000
P01857	Immunoglobulin heavy constant gamma 1	IGHG1	29360	0	1660600	0	0	26724	12602	273160	0	538850	251490	72097	690390	229550	0	25804	0	91249	369490	0	91463	53326	711930	2154900	1586600	712040	160650	136010	3155800	824940	1142900	1106300	308070	145540	90443	260970	246320	0	186930	0	0	34048	0	16682000	7196800	28797000	5325500
P01859	Immunoglobulin heavy constant gamma 2	IGHG2	0	0	0	0	0	0	0	0	0	47467	0	12161	67411	45147	0	0	0	0	52071	0	0	0	0	0	0	0	0	43850	27652	0	48952	0	0	0	0	29625	0	0	0	0	0	0	0	2235500	33803	3123800	2612800
P01860	Immunoglobulin heavy constant gamma 3	IGHG3	0	0	0	0	0	0	0	0	0	0	0	0	0	0	0	0	0	0	0	0	0	0	0	0	0	0	0	0	0	0	0	0	0	0	0	0	0	0	0	0	0	0	0	8820000	1430200	533720	0
P01861	Immunoglobulin heavy constant gamma 4	IGHG4	0	0	0	0	0	0	0	0	0	0	0	0	0	0	0	0	0	0	0	0	0	0	0	0	0	0	0	0	0	0	0	0	0	0	0	0	0	0	0	0	0	0	0	969090	315970	1020200	335630
P01871	Immunoglobulin heavy constant mu	IGHM	0	0	0	0	0	0	0	0	0	0	0	0	0	0	0	0	0	0	0	0	0	0	0	37106	0	0	0	0	0	0	0	0	0	0	0	0	0	0	0	0	0	0	0	2417200	757590	1601400	184740
P01876	Immunoglobulin heavy constant alpha 1	IGHA1	0	24852	29267	0	0	0	57550	0	257640	81108	282880	307780	3030600	205320	0	441480	0	229510	138710	438280	92192	16699	157660	134600	249600	102130	294910	0	50063	1422300	696140	641640	91772	111640	0	720000	113060	68109	0	31179	0	382530	45036	2438300	963460	330150	29002
P01877	Immunoglobulin heavy constant alpha 2	IGHA2	0	0	0	0	0	0	0	0	0	0	0	0	427010	0	0	0	0	38567	0	0	0	0	0	26489	0	0	0	0	0	0	28184	0	0	0	0	0	29841	0	0	0	0	88404	0	0	0	0	0
P01889	HLA class I histocompatibility antigen, B alpha chain	HLA-B	0	0	0	0	0	0	0	0	0	0	0	0	0	0	0	0	0	0	0	0	0	0	0	0	0	0	0	0	0	0	0	0	0	0	0	0	0	0	0	0	0	0	0	0	0	204210	0
P02042	Hemoglobin subunit delta	HBD	0	0	0	0	0	0	0	0	0	0	0	0	0	0	0	0	0	0	0	0	0	0	0	0	430840	40938	0	0	40082	0	49807	0	0	0	0	207030	0	0	0	0	0	0	0	1878800	308510	3588600	2041000
P02144	Myoglobin	MB	0	0	0	0	0	0	0	0	0	0	0	0	0	0	0	135200	0	0	0	28055	680460	179550	0	0	0	176690	0	0	0	0	0	0	0	0	573040	0	0	0	0	0	0	0	0	0	0	0	0
P02452	Collagen alpha-1(I) chain	COL1A1	0	114000	1575500	0	0	0	0	0	860950	0	0	0	0	0	40940	0	0	0	0	0	3196300	7418900	26559000	45851000	84072000	37264000	12061000	33310000	18312000	39799000	37547000	34023000	16855000	9616000	18967000	56310000	6519000	249960	199320	18631	260520	0	445570	40794000	13345000	138840000	78266000
P02461	Collagen alpha-1(III) chain	COL3A1	1294000	0	2609500	0	20032	0	0	0	1048800	0	0	0	0	0	0	0	0	0	0	0	1979600	0	10746000	14680000	0	0	4952700	10622000	80960	10407000	10744000	13961000	7000900	4719800	5176800	20749000	0	104890	415740	0	133050	0	91059	3181500	1104200	20644000	3724500
P02462	Collagen alpha-1(IV) chain;Arresten	COL4A1	0	0	0	0	0	0	0	0	0	0	0	0	0	0	0	0	0	0	0	0	0	0	0	0	0	0	0	0	0	0	0	0	0	0	0	0	0	0	0	0	0	0	0	0	0	46420	109700
P02511	Alpha-crystallin B chain	CRYAB	0	0	0	0	0	0	0	0	0	0	0	0	0	0	0	725120	0	0	0	0	0	0	0	0	0	0	0	0	447020	603150	0	0	0	0	0	0	0	0	0	0	0	0	0	0	0	0	1039400
P02545	Prelamin-A/C;Lamin-A/C	LMNA	0	0	32473	0	0	0	0	650510	26276	77467	132320	0	162990	476250	0	0	0	17919	47553	0	26654	43524	144630	2150300	310070	1859900	416680	795710	3545800	4251300	1009300	193220	107980	499990	178320	238020	272030	0	73857	0	0	0	0	3263600	1135300	6013900	6042300
P02549	Spectrin alpha chain, erythrocytic 1	SPTA1	0	0	0	0	0	0	0	0	0	0	0	0	0	0	0	0	0	0	0	0	0	0	0	0	0	0	0	0	0	0	0	0	0	0	0	0	0	0	0	0	0	0	0	39848	124920	54993	43379
P02585	Troponin C, skeletal muscle	TNNC2	0	0	0	0	0	0	0	0	0	0	0	0	0	0	0	4361800	0	0	0	0	0	0	0	0	0	0	0	0	0	0	0	0	0	0	0	0	0	0	0	0	0	0	0	0	0	0	0
P02647	Apolipoprotein A-I	APOA1	0	0	0	0	0	0	0	0	0	0	0	0	200590	0	0	0	0	0	0	0	0	0	0	122150	49662	0	0	0	80141	0	66751	0	0	0	0	100470	0	0	0	0	0	0	0	9620700	3831600	27638000	7932900
P02649	Apolipoprotein E	APOE	0	0	0	0	0	0	0	0	0	0	0	0	0	0	0	0	0	0	0	0	0	0	0	0	0	747510	0	0	0	0	0	0	0	0	0	0	0	0	0	0	0	0	0	337300	48539	2775000	649810
P02652	Apolipoprotein A-II	APOA2	0	0	0	0	0	0	0	0	0	0	0	0	0	0	0	0	0	0	0	0	0	0	0	0	0	0	0	0	0	0	0	0	0	0	0	0	0	0	0	0	0	0	0	59714	0	156320	0
P02656	Apolipoprotein C-III	APOC3	0	0	0	0	0	0	0	0	0	0	0	0	0	0	0	0	0	0	90884	0	0	0	0	0	0	0	0	0	0	0	0	0	0	0	0	0	0	0	0	58355	0	0	0	0	0	0	0
P02671	Fibrinogen alpha chain	FGA	0	0	0	0	0	0	0	0	0	0	0	0	0	0	0	0	0	0	0	0	27210	0	0	168820	713170	185040	0	77600	3588500	31536	99665	490470	0	121390	62633	694450	0	0	0	0	0	0	0	3440900	1608500	3625600	1001400
P02675	Fibrinogen beta chain	FGB	0	0	0	0	0	0	0	0	0	0	0	0	81256	0	0	0	0	0	0	0	215220	0	0	185510	161620	53141	0	71276	9768900	302520	0	0	0	0	0	1265200	0	0	0	0	0	0	0	5939200	1136400	2036400	215870
P02679	Fibrinogen gamma chain	FGG	0	0	0	0	0	0	0	0	0	0	0	0	42027	0	0	33822	0	0	0	0	42044	32447	0	0	408850	0	0	0	1069500	0	163580	534820	44551	73503	0	516090	31767	0	0	0	0	0	0	3167600	1494400	6745500	3046900
P02724	Glycophorin-A	GYPA	0	0	0	0	0	0	0	0	0	0	0	0	0	0	0	0	0	0	0	0	0	0	0	0	0	0	0	0	0	0	0	0	0	0	0	0	0	0	0	0	0	0	0	218330	160930	0	0
P02730	Band 3 anion transport protein	SLC4A1	0	0	0	0	0	0	0	0	0	0	0	0	0	0	0	0	0	0	0	0	0	0	0	711390	3024000	4378900	428680	97748	3875100	2925200	0	2475200	1952100	1618600	47684	4421200	0	118030	0	0	0	0	0	1961000	1448900	2053500	2293600
P02743	Serum amyloid P-component	APCS	0	0	1236000	0	0	0	0	0	352970	0	0	0	0	0	0	0	0	0	0	0	0	0	3145000	1345500	454350	12671000	0	327690	0	0	1015200	0	1380300	1006400	926590	0	0	0	96682	0	0	0	0	2774000	1472300	274560	7640200
P02747	Complement C1q subcomponent subunit C	C1QC	0	0	0	0	0	0	0	0	0	0	0	0	0	0	0	0	0	0	0	0	0	0	0	0	0	0	0	0	0	0	0	0	0	0	0	0	0	0	0	0	0	0	0	219540	0	332840	67824
P02748	Complement component C9	C9	0	0	0	0	0	0	0	0	0	0	0	0	0	0	0	0	0	0	0	0	0	0	0	0	0	0	0	0	0	0	0	0	0	0	0	0	0	0	0	0	0	0	0	47895	180350	0	0
P02749	Beta-2-glycoprotein 1	APOH	0	0	0	0	0	0	0	0	0	0	0	0	0	0	0	0	0	0	0	0	0	0	0	0	0	59275	0	0	0	0	0	0	0	0	0	0	0	0	0	0	0	0	0	528280	534220	0	0
P02751	Fibronectin	FN1	0	0	0	0	0	0	0	0	0	0	0	0	0	0	0	0	0	0	0	0	0	0	0	84102	83900	191120	0	0	13363	0	0	59395	0	0	0	136550	0	0	0	0	0	0	0	197830	33189	9797800	2244300
P02760	Protein AMBP	AMBP	0	0	0	0	0	0	0	0	0	0	0	0	0	0	0	0	0	0	0	0	0	0	0	1108300	0	1526800	0	0	0	488280	0	0	314000	0	786790	0	54509	0	0	0	0	0	0	90889	78829	0	592070
P02763	Alpha-1-acid glycoprotein 1	ORM1	0	0	0	0	0	0	0	0	0	0	0	0	0	0	0	0	0	0	0	0	0	0	0	0	0	0	0	0	0	0	0	0	0	0	0	0	0	0	0	0	0	0	0	272020	424270	4071300	118010
P02765	Alpha-2-HS-glycoprotein	AHSG	0	0	0	0	0	0	0	0	0	0	0	0	0	0	0	0	0	0	0	0	0	0	0	0	0	0	0	0	0	0	0	0	0	0	0	0	0	0	0	0	0	0	0	233170	94855	343630	0
P02766	Transthyretin	TTR	0	0	0	0	0	0	0	0	0	0	0	0	0	0	0	0	0	0	0	0	0	0	0	0	0	0	0	0	0	0	0	0	0	0	0	0	0	0	0	0	0	0	0	700670	275330	6109300	2300100
P02774	Vitamin D-binding protein	GC	0	0	0	0	0	0	0	0	0	0	0	0	0	0	0	0	0	0	0	0	0	0	0	0	0	0	0	0	0	0	0	0	0	0	0	0	0	0	0	0	0	0	0	308170	10578	144090	0
P02786	Transferrin receptor protein 1	TFRC	0	0	0	0	0	0	0	0	0	0	0	0	0	0	0	0	0	0	0	0	0	0	0	0	0	0	0	0	81119	0	0	0	0	0	0	0	0	0	0	0	0	0	0	0	0	0	0
P02787	Serotransferrin	TF	0	0	19709	0	0	0	0	0	0	0	0	31398	162660	0	0	0	0	34438	0	0	0	60289	0	231960	1236200	56229	0	0	431140	309190	525260	294860	86019	0	69033	340300	0	0	0	0	0	0	0	21023000	10502000	4955200	2439900
P02788	Lactotransferrin	LTF	0	0	0	0	0	0	166730	104230	124170	422350	244140	176980	3968800	212810	0	668400	26535	518060	541760	501610	0	0	33172	0	0	58221	139620	610880	0	28949	2581100	984050	43062	0	0	62366	305810	21058	21469	0	0	1057100	0	266890	0	0	0
P02790	Hemopexin	HPX	0	0	0	0	0	0	0	0	0	0	0	0	0	0	0	0	0	0	0	0	0	0	0	0	0	0	0	0	0	0	0	0	0	0	0	0	0	0	0	0	0	0	0	2758900	883130	2975800	3301700
P02792	Ferritin light chain	FTL	0	0	0	0	0	0	0	0	0	0	0	0	0	0	0	0	0	0	0	0	0	0	0	0	0	0	0	0	0	0	0	0	0	0	0	0	0	0	0	0	0	0	0	0	0	8187700	0
P02794	Ferritin heavy chain	FTH1	0	0	0	0	0	0	0	0	0	0	0	0	0	0	0	0	0	0	0	0	0	0	0	0	0	0	0	0	0	0	0	0	0	0	0	0	0	0	0	0	0	0	0	0	0	394950	0
P02808	Statherin	STATH	0	0	0	0	0	0	0	0	0	0	0	0	762470	0	0	118190	0	0	0	0	0	0	0	0	0	0	0	0	0	0	0	0	0	0	0	0	0	0	0	0	0	192420	0	0	0	0	0
P02810	Salivary acidic proline-rich phosphoprotein 1/2	PRH1	0	0	0	0	0	0	0	0	0	0	87172	0	0	0	0	4812400	0	0	363550	54627	0	0	0	0	0	40146	0	1216900	0	0	0	0	0	0	0	0	0	0	0	0	0	0	0	0	0	0	0
P03905	NADH-ubiquinone oxidoreductase chain 4	MT-ND4	0	0	0	0	0	0	0	0	0	0	0	0	0	0	0	0	0	0	0	0	0	0	0	0	0	0	0	0	0	0	0	0	0	0	44326	0	0	0	0	0	0	0	0	0	0	0	0
P04003	C4b-binding protein alpha chain	C4BPA	0	0	0	0	0	0	0	0	0	0	0	0	0	0	0	0	0	0	0	0	0	0	0	0	52863	0	0	0	0	0	0	0	0	0	0	33980	0	0	0	0	0	0	0	57984	0	0	0
P04004	Vitronectin	VTN	0	0	0	0	31235	0	0	0	0	0	0	0	0	0	0	0	0	0	0	0	0	0	0	0	0	1330100	0	0	0	166370	0	0	674390	0	0	0	0	0	0	0	0	0	0	0	0	1235700	2971400
P04040	Catalase	CAT	0	0	15477	32120	0	517070	563480	714220	150920	1681000	862890	366120	887030	1534500	6259.5	426840	468850	1584000	1478200	312120	392940	205730	332470	100220	0	504850	3407700	1464500	847250	1116400	471090	343160	766330	627460	133630	440200	1565400	181400	334900	508950	118210	161310	101900	1316900	584680	1103600	585950
P04062	Lysosomal acid glucosylceramidase	GBA1	0	0	0	0	0	0	0	0	0	0	0	0	0	0	0	0	0	26965	0	0	0	0	0	0	0	0	33519	39196	140030	124160	0	0	0	0	0	0	36783	0	0	0	0	0	0	0	0	0	0
P04075	Fructose-bisphosphate aldolase A	ALDOA	0	0	0	0	0	46444	59252	434860	11737	33600	243340	96522	325000	218660	0	32054000	34217	97855	78423	44076	1503300	1028100	45323	206670	21730	755520	114860	323510	503640	5060800	262570	40009	50372	84742	2122100	134540	1005800	19646	45076	53185	0	36685	0	1021300	262720	304100	80303
P04080	Cystatin-B	CSTB	0	0	0	0	0	0	10810	0	0	0	3630100	0	425200	0	0	89566	0	28907	0	584570	50968	0	0	0	0	0	0	247780	1576100	502160	0	0	0	47915	0	0	0	0	37762	0	0	27685	0	0	0	0	0
P04083	Annexin A1	ANXA1	0	0	0	0	0	0	67228	36640	0	0	6719600	0	994080	125010	0	0	0	230960	0	1245000	116960	0	0	152350	16477	81358	43724	1160900	4031000	1137600	237910	257060	18730	71550	0	143700	114200	0	153640	0	0	185760	0	816310	109690	3239700	5919700
P04114	Apolipoprotein B-100	APOB	0	0	0	0	0	0	0	0	0	0	0	0	0	0	0	0	0	0	0	0	0	0	0	0	0	0	0	0	0	0	0	0	0	0	0	0	0	0	0	0	0	0	0	2041800	411930	1719500	3657000
P04179	Superoxide dismutase [Mn], mitochondrial	SOD2	0	0	0	0	0	0	0	0	0	0	0	0	0	0	0	36145	0	0	0	0	0	0	0	0	0	0	0	0	97855	239720	0	0	0	0	0	0	0	0	0	0	0	0	0	0	0	0	0
P04196	Histidine-rich glycoprotein	HRG	0	0	0	0	0	0	0	0	0	0	0	0	0	0	0	0	0	0	0	0	0	0	0	0	0	7182.3	0	0	0	0	0	0	0	0	0	29673	0	0	0	0	0	0	0	97827	0	264450	166390
P04216	Thy-1 membrane glycoprotein	THY1	0	0	0	0	0	0	0	0	0	0	0	0	0	0	0	0	0	0	0	0	0	0	0	0	0	0	0	0	0	0	0	0	0	0	0	0	0	0	0	0	0	0	0	556360	0	130010	0
P04217	Alpha-1B-glycoprotein	A1BG	0	0	0	0	0	0	0	0	0	0	0	0	0	0	0	0	0	0	0	0	0	0	0	0	0	0	0	0	0	0	0	0	0	0	0	0	0	0	0	0	0	0	0	395960	0	128840	0
P04259	Keratin, type II cytoskeletal 6B	KRT6B	0	0	0	0	0	0	909080	819900	0	729510	76178	581460	1932000	1558600	0	486310	419100	402420	586900	0	0	0	0	461670	0	0	0	1182700	0	2921000	807910	460300	672970	0	0	0	0	0	0	375030	222930	0	0	0	0	0	0
P04275	von Willebrand factor	VWF	0	0	0	0	0	0	0	0	0	0	0	0	0	0	0	0	0	0	0	0	0	0	0	0	0	0	0	0	0	0	0	0	0	0	0	0	0	0	0	0	0	0	0	67168	0	180340	0
Q02383	Semenogelin-2	SEMG2	0	0	0	0	0	0	0	0	0	0	0	0	0	0	0	0	30029	0	0	0	0	0	0	0	0	0	0	0	0	0	0	0	0	0	0	0	0	0	0	0	0	0	0	0	0	0	0
P04280	Basic salivary proline-rich protein 1	PRB1	0	0	0	0	0	0	0	0	0	0	0	0	136800	0	0	0	0	0	0	0	0	0	0	0	0	0	0	0	0	0	0	0	0	0	0	0	0	0	0	0	0	0	0	0	0	0	0
P04406	Glyceraldehyde-3-phosphate dehydrogenase	GAPDH	30903	0	75816	21181	0	981070	1009100	2679700	290370	1779500	1360300	499850	2470500	2500100	144230	23492000	689500	1782300	2143800	350900	1182700	1305800	470980	835120	521720	1171100	4756000	2235900	64350000	15778000	1223300	544820	554550	394230	1167500	501990	2777800	410010	976950	1049400	115580	407220	461430	3420000	757380	3112300	2395100
P04439	HLA class I histocompatibility antigen, A alpha chain	HLA-A	0	0	0	0	0	0	0	0	0	0	0	0	0	0	0	0	0	0	0	0	0	0	0	0	0	0	0	0	0	0	0	0	0	0	0	0	0	0	0	0	0	0	0	0	0	96443	86509
P04632	Calpain small subunit 1	CAPNS1	0	0	0	0	0	0	0	0	0	0	0	0	0	0	0	0	0	0	0	0	0	0	0	0	0	0	0	0	0	0	0	0	0	0	0	0	0	0	0	0	0	0	0	9965.7	0	0	0
P04792	Heat shock protein beta-1	HSPB1	0	0	0	0	0	50162	161410	1280600	0	320380	2001000	120360	1272900	1352300	0	1838200	127260	208610	113040	273020	348860	108950	102030	242230	245110	179860	204500	1586100	13895000	12105000	128100	441360	51429	273750	268020	440300	230400	52370	248040	85788	71355	163150	0	371560	38989	492760	685280
P04843	Dolichyl-diphosphooligosaccharide--protein glycosyltransferase subunit 1	RPN1	0	0	0	0	0	0	0	0	0	0	0	0	0	0	0	0	0	0	0	0	0	0	0	0	0	34890	0	0	70203	303000	50599	0	0	0	0	0	0	0	0	0	0	0	0	50274	24080	0	0
P04844	Dolichyl-diphosphooligosaccharide--protein glycosyltransferase subunit 2	RPN2	0	0	0	0	0	0	0	0	0	0	0	0	0	0	0	0	0	0	0	0	0	0	0	0	0	0	0	0	82813	63625	0	0	0	0	0	0	0	0	0	0	0	0	0	0	0	115560	167980
P04899	Guanine nucleotide-binding protein G(i) subunit alpha-2	GNAI2	0	0	0	0	0	0	0	0	0	0	0	0	0	0	0	0	0	0	0	0	0	0	0	0	0	0	0	0	0	0	56047	0	0	0	0	0	0	0	0	0	0	0	0	684700	585730	1480800	499220
Q93077	Histone H2A type 1-C	H2AC6	894930	0	5458000	0	66521	0	24188	0	1704500	0	456510	179770	1865700	0	0	369170	0	0	0	0	768180	1572800	4546800	11897000	11217000	13104000	5637900	7167900	7806800	7229500	10519000	12527000	6599000	5006300	6043800	9571400	1831800	0	1016200	0	615760	212890	0	6557300	2343100	16971000	7898800
P05023	Sodium/potassium-transporting ATPase subunit alpha-1	ATP1A1	0	0	0	0	0	0	0	0	0	0	0	0	0	0	0	0	0	0	0	0	0	0	0	0	0	0	0	0	37951	0	0	0	0	0	76653	0	0	0	0	0	0	0	0	104420	0	0	57704
P05026	Sodium/potassium-transporting ATPase subunit beta-1	ATP1B1	0	0	0	0	0	0	0	0	0	0	0	0	0	0	0	0	0	0	0	0	0	0	0	0	0	0	0	0	1491500	0	0	0	0	0	0	0	0	0	0	0	0	0	0	0	0	0	0
P05089	Arginase-1	ARG1	0	167020	146570	0	0	556710	869260	2582500	25366	2015400	1249500	622030	929170	2293900	26819	1052300	1239300	2837000	2803300	480600	331340	1015200	982580	325690	174670	631280	3811000	1977300	2228600	7461000	885770	876380	1053600	947140	530620	1338700	2433200	484450	457550	768200	210280	410120	113530	0	0	0	0
P05090	Apolipoprotein D	APOD	0	0	0	0	0	0	0	0	0	0	0	0	0	0	0	0	0	29933000	0	0	0	0	0	0	0	0	0	0	677420	0	0	0	0	0	0	0	0	0	0	0	0	0	0	0	0	0	0
P05091	Aldehyde dehydrogenase, mitochondrial	ALDH2	0	0	0	0	0	0	0	0	0	0	0	0	0	0	0	52961	0	0	0	0	0	0	0	0	51329	0	0	0	0	122140	0	0	0	0	0	0	0	0	0	0	0	0	0	914610	904490	343660	1665900
P05109	Protein S100-A8	S100A8	0	17748	120210	0	0	450560	967730	3419500	70653	3275800	3966800	730960	4624200	3751700	398680	1735700	476250	1245900	1403000	1961700	1096600	756790	550210	0	598640	3193000	1136900	4647400	38747000	51790000	18161000	1082900	1007100	1168900	886810	255130	1657700	292860	942070	608880	220330	425790	675220	0	0	374240	0
P05120	Plasminogen activator inhibitor 2	SERPINB2	0	0	0	0	0	0	0	35149	0	51066	20121	0	0	102120	0	0	0	46096	55353	0	0	0	0	0	0	0	0	0	75267	173350	0	0	0	0	0	0	0	0	0	0	0	0	0	0	0	0	0
P05141	ADP/ATP translocase 2	SLC25A5	0	0	0	0	0	0	0	0	0	0	0	0	0	0	0	0	0	0	0	0	0	0	0	0	0	0	0	0	96353	0	0	0	0	0	0	0	0	0	0	0	0	0	0	0	56743	0	0
P05155	Plasma protease C1 inhibitor	SERPING1	0	0	0	0	0	0	0	0	0	0	0	0	0	0	0	0	0	0	0	0	0	0	0	0	0	0	0	0	0	0	0	0	0	0	0	0	0	0	0	0	0	0	0	153510	0	606210	296010
P05164	Myeloperoxidase	MPO	0	0	0	0	0	0	0	0	0	0	0	0	551500	0	0	1188700	0	0	0	0	0	0	0	0	0	0	0	0	0	0	180800	0	0	0	0	0	0	0	0	0	0	0	0	0	0	0	0
P05166	Propionyl-CoA carboxylase beta chain, mitochondrial	PCCB	0	0	0	0	0	0	0	0	0	0	0	0	0	0	0	0	0	0	0	0	0	0	0	0	0	0	0	0	0	0	0	0	0	0	0	0	0	0	0	0	0	0	0	0	23460	0	0
P05186	Alkaline phosphatase, tissue-nonspecific isozyme	ALPL	0	0	0	0	0	0	0	0	0	0	0	0	0	0	0	0	0	257400	0	0	0	0	0	0	0	0	0	0	0	0	0	0	0	0	0	0	0	0	0	0	0	0	0	0	0	0	0
P05387	Large ribosomal subunit protein P2	RPLP2	0	0	0	0	0	0	0	0	0	0	0	0	0	0	0	0	0	0	0	0	0	0	0	64446	0	0	0	46621	0	912470	0	0	0	0	0	0	0	0	0	0	0	0	0	35346	0	245030	0
P05388	Large ribosomal subunit protein uL10	RPLP0	0	0	0	0	0	0	0	0	0	0	0	0	0	0	0	0	0	0	0	0	0	0	0	0	0	0	0	0	177630	67471	0	0	0	0	0	0	0	0	0	0	0	0	0	219390	61792	1824500	718140
P05413	Fatty acid-binding protein, heart	FABP3	0	0	0	0	0	0	0	0	0	0	0	0	0	0	0	222830	0	0	115070	0	0	0	0	0	0	0	0	0	0	0	0	0	0	0	0	0	0	0	0	114590	0	0	0	0	0	0	0
P05546	Heparin cofactor 2	SERPIND1	0	0	0	0	0	0	0	0	0	0	0	0	0	0	0	0	0	0	0	0	0	0	0	0	0	0	0	0	0	0	0	0	0	0	0	0	0	0	0	0	0	0	0	487060	88348	0	38237
P05783	Keratin, type I cytoskeletal 18	KRT18	38673	0	0	0	0	0	0	0	0	451310	0	409980	0	375060	0	0	0	288380	0	0	0	0	0	103610	0	0	0	0	0	0	0	0	0	0	0	0	0	0	0	0	0	0	0	311010	0	0	72096
P05976	Myosin light chain 1/3, skeletal muscle isoform	MYL1	0	0	34884	0	0	0	0	124150	0	0	0	0	0	0	0	18958000	0	0	0	0	3101700	3084500	0	819200	0	3763600	0	241450	0	0	0	0	0	0	8112200	0	0	0	0	0	0	0	0	0	0	0	0
P05997	Collagen alpha-2(V) chain	COL5A2	0	0	0	0	0	0	0	0	0	0	0	0	0	0	0	0	0	0	0	0	0	0	24135	39426	0	68031	0	19322	0	0	0	0	86324	0	0	0	0	0	0	0	0	0	0	0	0	478060	136040
P06280	Alpha-galactosidase A	GLA	0	0	0	0	0	0	0	0	0	0	0	0	0	0	0	0	0	0	0	0	0	0	0	0	0	0	0	0	205630	0	0	0	0	0	0	0	0	0	0	0	0	0	0	0	0	0	0
P06310	Immunoglobulin kappa variable 2-30	IGKV2-30	0	0	0	0	0	0	0	0	0	0	0	0	0	0	0	0	0	0	0	0	0	0	0	0	0	0	0	0	0	0	0	0	0	0	0	0	0	0	0	0	0	0	0	105960	142970	0	0
P06312	Immunoglobulin kappa variable 4-1	IGKV4-1	0	0	0	0	0	0	0	0	0	0	0	0	0	0	0	0	0	0	0	0	0	0	0	0	0	0	0	0	0	0	0	0	0	0	0	0	0	0	0	0	0	0	0	467670	176150	0	0
P06454	Prothymosin alpha	PTMA	0	0	0	0	0	0	0	0	0	0	0	0	0	0	0	0	0	0	0	0	0	0	0	0	0	0	0	0	0	0	0	0	0	0	0	0	0	0	0	0	0	0	0	39776	0	974000	77276
P06576	ATP synthase subunit beta, mitochondrial	ATP5F1B	0	0	0	0	0	0	0	0	34543	0	0	0	0	0	0	815900	0	0	0	0	73118	145900	0	104710	74504	748540	0	66930	265650	1615100	89234	109820	0	0	160480	100150	0	0	0	0	0	0	0	254020	34134	1558100	840490
P06702	Protein S100-A9	S100A9	0	61226	59145	43730	0	2826800	3535200	17113000	64883	6308600	12823000	1789400	11680000	7810600	368390	4059900	1529000	3404900	3296800	3322500	3108000	2215700	4235700	970680	2099400	6463700	3078700	12847000	229960000	136220000	33466000	3981300	3931200	2614300	2595900	4596300	5628100	656660	2243200	1717400	609800	983140	1690200	53432	100300	55702	0
P06727	Apolipoprotein A-IV	APOA4	0	0	0	0	0	0	0	0	0	0	0	0	0	0	0	0	0	0	0	0	0	0	0	0	0	0	0	0	0	0	0	0	0	0	0	0	0	0	0	0	0	0	0	294900	389650	566350	85895
P06732	Creatine kinase M-type	CKM	0	0	0	0	0	0	0	248240	0	0	0	0	50669	0	0	50409000	69293	0	0	0	449910	2232100	0	580360	0	330140	0	0	0	3629700	390120	0	0	0	915110	74392	2281500	0	0	0	0	0	0	0	0	0	0
P06733	Alpha-enolase	ENO1	0	0	0	0	0	23722	52288	387480	0	66200	352530	0	777890	287250	13697	7006400	0	0	118530	33350	111900	508630	132900	515170	15649	79643	377390	417680	855120	9813900	180820	207710	148850	23324	1193700	0	843040	0	34137	0	0	0	0	1008400	112910	1893200	1713100
P06744	Glucose-6-phosphate isomerase	GPI	0	0	0	0	0	0	0	0	0	0	0	0	0	0	0	1349600	0	0	0	0	0	0	0	0	0	0	0	0	181860	148870	0	0	0	0	0	0	0	0	0	0	0	0	0	1298100	575910	580880	618240
P06748	Nucleophosmin	NPM1	0	0	0	0	0	0	0	48584	0	0	0	0	50393	0	0	0	0	50399	0	0	0	0	0	0	0	0	0	0	265560	652440	0	0	0	0	0	0	0	0	0	0	0	0	0	0	0	26843	39391
P06753	Tropomyosin alpha-3 chain	TPM3	0	0	0	0	0	0	30136	120090	0	112770	0	0	57374	61957	0	3220500	0	42217	0	0	551260	309060	31332	0	0	55039	0	224520	900820	145920	30258	0	52649	0	329330	32085	0	0	0	0	0	0	0	0	0	0	0
P06858	Lipoprotein lipase	LPL	0	0	0	0	0	0	0	0	0	0	0	0	0	31712	0	0	0	0	782500	0	0	0	0	0	0	0	0	121370	0	0	0	0	0	0	0	0	0	0	0	82769	0	0	0	0	0	0	0
P06865	Beta-hexosaminidase subunit alpha	HEXA	0	0	0	0	0	0	0	0	0	0	0	0	0	0	0	0	0	0	0	0	0	0	0	0	0	0	0	0	127300	0	0	0	0	0	0	0	0	0	0	0	0	0	0	0	0	0	0
P33778	Histone H2B type 1-B	H2BC3	0	0	0	0	0	0	0	0	0	0	0	0	106050	0	0	0	0	0	0	0	0	0	0	0	0	0	0	0	0	0	0	0	0	0	0	0	0	0	0	0	0	0	0	0	0	0	103610
P07099	Epoxide hydrolase 1	EPHX1	0	0	0	0	0	0	0	0	0	0	0	0	0	0	0	0	0	0	0	0	0	0	0	100430	0	48514	207220	30480	16818	32505	469090	36476	0	0	34403	74836	0	0	0	0	0	0	0	418080	281040	91939	32128
P07108	Acyl-CoA-binding protein	DBI	0	0	0	0	0	0	0	0	0	0	0	0	0	0	0	0	0	0	0	0	0	0	0	0	0	0	0	0	0	66839	0	0	0	0	0	0	0	0	0	0	0	0	0	0	0	0	0
P07195	L-lactate dehydrogenase B chain	LDHB	0	0	0	0	0	0	0	0	0	0	0	0	0	0	0	0	0	0	0	0	0	0	0	0	0	0	0	0	49761	0	61478	0	0	0	0	0	0	0	0	0	0	0	0	1667600	961600	503410	363330
P07203	Glutathione peroxidase 1	GPX1	0	0	0	0	0	0	0	0	0	0	0	0	0	0	0	0	0	0	0	0	0	0	0	0	0	0	0	0	0	0	0	0	0	0	0	0	0	0	0	0	0	0	0	0	0	298890	0
P07225	Vitamin K-dependent protein S	PROS1	0	0	0	0	0	0	0	0	0	0	0	0	0	0	0	0	0	0	0	0	0	0	0	0	0	0	0	0	0	0	0	0	0	0	0	0	0	0	0	0	0	0	0	0	0	33321	28987
P07237	Protein disulfide-isomerase	P4HB	0	0	0	0	0	0	0	0	0	0	40951	0	0	0	0	0	0	0	0	0	0	0	0	0	0	0	0	67331	69717	259640	0	0	0	0	0	0	0	0	0	0	0	0	0	90450	0	2274100	122700
P07305	Histone H1.0	H1-0	0	0	0	0	0	0	0	0	0	0	0	0	0	0	0	0	0	0	0	0	0	0	0	154800	300750	158870	0	0	337990	0	46586	0	91800	0	152900	0	0	0	0	0	0	0	0	1276300	953650	0	71978
P07339	Cathepsin D	CTSD	18016	0	0	0	0	76307	185560	540840	0	291620	82455	0	230720	327920	0	216290	26593	1826400	238110	34516	0	8789.7	16034	0	0	0	112700	116850	20341000	3755300	1555300	0	96417	41824	0	16160	118200	21355	47480	0	17951	66057	36832	0	196170	474420	44637
P07355	Annexin A2	ANXA2	0	38848	10751	0	0	1299200	3324100	3481700	40619	2863700	3381400	884160	3449400	3557100	0	1079900	1127900	2208400	3212600	862580	968970	973130	1683200	2996200	1245600	2760100	5093300	5185500	74184000	13131000	4385300	2470600	2416200	2116600	1199300	2003600	3544400	483810	949260	952600	219550	461090	692370	7053300	3348500	9275900	14585000
P07384	Calpain-1 catalytic subunit	CAPN1	0	0	0	0	0	67501	31008	45995	0	242770	129610	0	205080	86070	0	0	23466	139320	43226	40629	54569	0	69085	0	0	0	250760	67878	2181400	724560	140520	42700	0	0	0	0	0	28311	0	104330	0	0	0	0	0	0	0
P07437	Tubulin beta chain	TUBB	0	0	0	0	0	0	0	27400	0	0	0	0	0	0	0	0	0	0	0	0	0	0	0	0	0	0	0	0	142070	0	0	0	0	0	0	0	0	0	0	0	0	0	0	197790	0	2006100	734080
P07451	Carbonic anhydrase 3	CA3	0	0	0	0	0	0	0	0	0	0	0	0	0	0	0	5400100	0	0	0	0	255120	3864500	0	20293	0	33972	0	0	0	49969	0	0	0	0	4017500	0	0	0	0	0	0	0	0	37712	27749	0	0
P07476	Involucrin	IVL	0	0	0	0	0	0	0	34992	0	0	138700	0	0	114120	0	0	0	0	0	0	0	0	0	0	0	0	0	95188	2464600	760510	18084	0	0	0	0	0	0	0	0	0	0	0	0	0	0	0	0
P07585	Decorin	DCN	0	0	0	0	0	0	0	0	0	0	0	0	0	0	0	0	0	0	0	0	0	0	44566	4287100	50191	52029	0	80643	63024	59957	0	0	26951	0	0	1955500	0	0	0	0	0	0	0	29679000	19058000	1396300	4001400
P07686	Beta-hexosaminidase subunit beta	HEXB	0	0	0	0	0	0	0	0	0	54878	0	0	0	32187	0	0	0	0	0	0	0	0	0	0	0	0	31990	0	1154300	0	0	0	0	0	0	0	27293	0	0	0	0	0	0	0	0	0	0
P07737	Profilin-1	PFN1	0	0	0	0	0	0	0	19225	0	0	33382	0	54467	0	0	0	0	0	0	0	0	0	0	0	0	0	0	60921	728990	334100	0	0	0	0	0	0	0	0	0	0	0	0	0	521260	233580	1878500	460690
P07814	Bifunctional glutamate/proline--tRNA ligase	EPRS1	0	0	0	0	0	0	0	0	0	0	0	0	0	0	0	0	0	0	0	0	0	0	0	0	0	0	0	0	18876	24263	0	0	0	0	0	0	0	0	0	0	0	0	0	0	0	0	0
P07858	Cathepsin B	CTSB	0	0	0	0	0	0	0	0	0	0	0	0	0	0	0	0	0	0	0	0	0	0	0	0	0	0	0	0	2131000	61038	0	0	0	0	0	0	0	0	0	0	0	0	0	0	0	139560	0
P07900	Heat shock protein HSP 90-alpha	HSP90AA1	0	0	0	0	0	0	0	0	0	0	0	10934	0	0	0	160520	0	0	0	0	0	0	0	0	11885	0	0	0	0	697380	0	0	0	0	0	0	0	0	0	0	0	0	0	256590	27199	914000	229690
P07954	Fumarate hydratase, mitochondrial	FH	0	0	0	0	0	0	0	0	0	0	0	0	0	0	0	73914	0	0	0	0	13289	0	0	0	0	0	0	0	0	0	0	0	0	0	0	0	0	0	0	0	0	0	0	0	0	220430	86106
P08123	Collagen alpha-2(I) chain	COL1A2	5460300	1203100	12992000	256410	298420	0	0	0	10561000	0	0	0	0	0	349700	0	0	0	0	0	10857000	21552000	64203000	101680000	89376000	78767000	46050000	55833000	57260000	74351000	73419000	76808000	38657000	28609000	48211000	69368000	12718000	1555700	5067700	1159300	3609100	1225100	1199400	15830000	6157800	49037000	40201000
P08133	Annexin A6	ANXA6	0	0	0	0	0	0	0	0	0	0	0	0	0	0	0	59462	0	0	0	0	0	0	21478	0	88680	0	0	52871	0	65088	0	0	0	0	42395	55980	46847	0	0	0	0	0	0	333200	0	1744400	1796800
P61586	Transforming protein RhoA	RHOA	0	0	0	0	0	0	0	0	0	0	0	0	0	0	0	0	0	0	0	0	0	0	0	0	0	0	0	0	54162	0	0	0	0	0	0	0	0	0	0	0	0	0	0	0	0	0	0
P08237	ATP-dependent 6-phosphofructokinase, muscle type	PFKM	0	0	0	0	0	0	0	0	0	0	0	0	0	0	0	2894800	0	0	0	0	0	0	0	0	0	0	0	0	0	0	0	0	0	0	22917	0	0	0	0	0	0	0	0	0	0	0	42386
P08238	Heat shock protein HSP 90-beta	HSP90AB1	0	0	0	0	0	0	0	24291	0	0	78881	27774	23095	0	0	281370	0	0	0	0	29493	0	0	0	0	0	0	37365	882160	2818500	0	0	0	0	0	52035	0	0	0	0	0	0	0	1807500	416500	1877100	1127800
P08246	Neutrophil elastase	ELANE	0	0	0	0	0	0	0	0	0	0	40742	0	330000	0	0	55171	0	0	0	0	42555	0	0	0	0	0	0	18055	0	0	75769	0	0	0	0	0	0	0	0	0	0	0	0	0	0	0	0
P08294	Extracellular superoxide dismutase [Cu-Zn]	SOD3	0	0	0	0	0	0	0	0	0	0	0	0	0	0	0	0	0	0	0	0	0	0	0	0	0	0	0	0	0	0	0	0	0	0	0	0	0	0	0	0	0	0	0	199930	0	30277	239170
P08311	Cathepsin G	CTSG	0	0	0	0	0	0	0	0	0	0	0	0	174830	0	0	0	0	0	0	0	0	0	0	0	0	39438	0	0	0	0	0	0	0	0	0	0	0	0	0	0	0	0	0	9439.6	0	357140	104870
P08559	Pyruvate dehydrogenase E1 component subunit alpha, somatic form, mitochondrial	PDHA1	0	0	0	0	0	0	0	0	0	0	0	0	0	0	0	0	0	0	0	0	0	35979	0	25234	0	33574	0	0	0	0	32582	0	0	0	0	0	0	0	0	0	0	0	0	0	0	0	0
P08571	Monocyte differentiation antigen CD14	CD14	0	0	0	0	0	0	0	0	0	0	0	0	0	0	0	0	0	0	0	0	0	0	0	0	0	0	0	0	0	0	0	0	0	0	0	0	0	0	0	0	0	0	0	0	0	90234	0
P08572	Collagen alpha-2(IV) chain;Canstatin	COL4A2	0	0	0	0	0	0	0	0	0	0	0	0	0	0	0	0	0	0	0	0	0	0	0	0	0	0	0	0	0	0	0	0	0	0	0	0	0	0	0	0	0	0	0	152800	176380	203240	58647
P08590	Myosin light chain 3	MYL3	0	0	0	0	0	0	0	0	0	0	0	0	0	0	0	3021600	0	0	0	0	1919800	1817300	0	218610	0	748070	0	0	0	0	0	0	0	0	645910	0	0	0	0	0	0	0	0	0	0	0	0
P08603	Complement factor H	CFH	0	0	0	0	0	0	0	0	0	0	0	0	0	0	0	0	0	0	0	0	0	0	0	0	58782	108450	0	0	55172	76493	0	0	73487	0	0	0	0	0	0	0	0	0	0	495520	134960	44318	87787
P08648	Integrin alpha-5	ITGA5	0	0	0	0	0	0	0	0	0	0	0	0	0	0	0	0	0	0	0	0	0	0	0	0	0	0	0	0	0	0	0	0	0	0	0	0	0	0	0	0	0	0	0	0	0	41832	0
P08670	Vimentin	VIM	6306400	563030	1436900	0	0	0	208000	22366	420660	1066000	0	0	528990	917920	0	357840	103020	364800	471080	0	57564	208810	5709300	9587800	2323600	6305600	8715700	1146600	6485100	823590	9474200	1846800	2535300	1801000	1516500	2273600	1505400	0	101310	0	0	33257	27169	2527000	1100900	23373000	12979000
P08754	Guanine nucleotide-binding protein G(i) subunit alpha-3	GNAI3	0	0	0	0	0	0	0	0	0	0	0	0	0	0	0	0	0	0	0	0	0	0	0	0	0	0	0	0	0	0	0	0	0	0	0	0	0	0	0	0	0	0	0	0	0	99568	0
P08758	Annexin A5	ANXA5	0	0	0	0	0	0	0	0	53737	0	0	0	0	0	0	0	0	0	0	0	0	0	0	1067300	127150	285350	483930	61930	1991300	433240	2653600	407020	0	244440	321030	463330	0	0	0	0	0	0	0	1388900	292770	1271900	1294200
P08842	Steryl-sulfatase	STS	0	0	0	0	0	0	0	0	0	0	0	0	0	34556	0	0	0	0	25626	0	0	0	0	0	0	0	0	0	39029	0	0	0	0	0	0	0	0	0	0	0	0	0	0	0	0	0	0
P08865	Small ribosomal subunit protein uS2	RPSA	0	0	0	0	0	0	0	0	0	0	0	0	0	0	0	0	0	0	0	0	0	0	0	0	0	0	0	19934	31627	848040	0	0	0	0	0	0	0	0	0	0	0	0	0	0	0	97303	30958
P09110	3-ketoacyl-CoA thiolase, peroxisomal	ACAA1	0	0	0	0	0	0	0	0	0	0	0	0	0	0	0	0	0	0	0	0	0	0	0	26372	0	0	0	0	0	0	44028	0	0	0	0	0	0	0	0	0	0	0	0	0	0	0	0
P09211	Glutathione S-transferase P	GSTP1	0	0	0	0	0	0	0	102430	34870	0	603200	0	770720	45060	0	0	0	45050	0	0	0	0	49775	51473	131810	112910	55522	292740	3659900	3490400	60165	62918	83916	0	96794	0	108440	0	0	0	0	0	0	210060	77514	252520	0
P09228	Cystatin-SA	CST2	0	0	0	0	0	0	0	0	0	0	0	0	0	0	0	138090	0	0	0	0	0	0	0	0	0	0	0	52840	0	0	0	0	0	0	0	0	0	0	0	0	0	0	0	0	0	0	0
P09382	Galectin-1	LGALS1	0	0	0	0	0	0	0	0	0	0	0	0	0	0	0	0	0	0	0	0	0	0	0	0	0	0	0	0	0	0	0	0	0	0	0	0	0	0	0	0	0	0	0	216850	0	1136700	273360
P09429	High mobility group protein B1	HMGB1	0	0	0	0	0	0	0	0	0	0	0	0	0	0	0	0	0	0	0	0	0	0	0	0	0	0	0	0	0	0	0	0	0	0	0	0	0	0	0	0	0	0	0	1068000	313430	0	0
P09455	Retinol-binding protein 1	RBP1	0	0	0	0	0	0	0	0	0	0	0	0	0	0	0	0	0	0	0	0	0	0	0	0	0	0	0	0	246290	0	0	0	0	0	0	0	0	0	0	0	0	0	0	0	0	0	0
P09466	Glycodelin	PAEP	0	0	0	0	0	0	0	0	0	0	911360	0	0	0	0	0	0	0	0	0	0	0	0	0	0	0	0	0	0	0	0	0	0	0	0	0	0	0	0	0	0	0	0	0	0	0	0
P09493	Tropomyosin alpha-1 chain	TPM1	0	0	0	0	0	0	0	0	0	0	0	0	0	0	0	6653600	0	0	0	39697	952350	521530	0	577250	0	809290	0	15353	249690	0	0	0	0	0	1805500	0	0	0	0	0	0	0	0	0	0	0	0
P09525	Annexin A4	ANXA4	0	0	0	0	0	0	0	0	0	0	0	0	0	0	0	0	0	0	0	0	0	0	0	0	0	0	0	0	668630	56207	0	0	0	0	0	0	0	0	0	0	0	0	0	249820	103980	118660	132710
P09543	2,3-cyclic-nucleotide 3-phosphodiesterase	CNP	0	0	0	0	0	0	0	0	0	0	0	0	0	0	0	0	0	0	0	0	0	0	0	0	0	0	0	0	0	0	0	0	0	0	0	0	0	0	0	0	0	0	0	75659	47959	0	0
P09601	Heme oxygenase 1	HMOX1	0	0	0	0	0	0	0	0	0	0	0	0	0	0	0	0	0	0	0	0	0	0	0	0	0	0	0	0	106900	26095	0	0	0	0	0	0	0	0	0	0	0	0	0	0	0	0	0
P09622	Dihydrolipoyl dehydrogenase, mitochondrial	DLD	0	0	0	0	0	0	0	0	0	0	0	0	0	0	0	0	0	0	0	0	0	0	0	0	0	0	0	0	55799	0	0	0	0	0	0	0	0	0	0	0	0	0	0	0	54586	0	0
P09651	Heterogeneous nuclear ribonucleoprotein A1	HNRNPA1	0	0	0	0	0	0	0	0	0	0	0	0	0	0	0	0	0	0	0	0	0	0	0	0	0	0	0	0	180670	245410	0	0	0	0	0	0	0	0	0	0	0	0	0	436660	53167	418330	35064
P09668	Pro-cathepsin H	CTSH	0	0	0	0	0	0	0	0	0	12789	0	0	0	0	0	0	0	22536	0	0	0	0	0	0	0	0	0	0	370940	0	0	0	0	0	0	0	0	0	0	0	0	0	0	0	0	0	0
P09871	Complement C1s subcomponent	C1S	0	0	0	0	0	0	0	0	0	0	0	0	0	0	0	0	0	0	0	0	0	0	0	0	0	0	0	0	0	0	0	0	0	0	0	0	0	0	0	0	0	0	0	51772	0	0	0
P09874	Poly [ADP-ribose] polymerase 1	PARP1	0	0	0	0	0	0	0	0	0	0	0	0	0	0	0	0	0	0	0	0	0	0	0	0	0	0	0	0	0	0	0	0	0	0	0	0	0	0	0	0	0	0	0	54636	0	0	0
P09960	Leukotriene A-4 hydrolase	LTA4H	0	0	0	0	0	0	0	0	0	0	0	0	0	0	0	0	0	0	0	0	0	0	0	0	0	0	0	0	25679	64010	0	0	0	0	0	0	0	0	0	0	0	0	0	109210	0	76430	0
P09972	Fructose-bisphosphate aldolase C	ALDOC	0	0	0	0	0	0	0	0	0	0	0	0	24941	0	0	5668100	0	0	0	0	0	0	0	0	0	0	0	0	18486	1385600	47615	0	0	0	56865	0	0	0	0	0	0	0	0	0	0	105650	93374
P0C0L5	Complement C4-B	C4B	0	0	0	0	0	0	0	0	0	0	0	0	0	0	0	0	0	0	0	0	0	0	0	51912	28858	0	0	0	0	0	0	0	0	0	0	0	0	0	0	0	0	0	0	1167800	355440	2489700	3810700
Q71UI9	Histone H2A.V	H2AZ2	0	0	0	0	0	0	0	0	0	0	0	0	0	0	0	0	0	0	0	0	0	0	0	0	0	0	0	0	0	0	0	0	0	0	0	0	0	0	0	0	0	0	0	109390	79763	0	118040
P0CG48	Polyubiquitin-C	UBC	0	12499	0	0	0	289500	2344200	457830	34355	2463700	1497200	605290	2274200	2394500	146050	1980600	1531800	2299500	1893600	783210	856280	1451400	716700	826670	920100	1577700	3519500	2510400	11252000	14542000	2479400	1603400	2371400	1644600	910710	1850900	2432400	449450	886300	774220	541190	308770	627690	1773900	507190	4387600	6309500
P0DMV8	Heat shock 70 kDa protein 1A	HSPA1A	0	0	0	0	0	0	0	0	0	0	286320	26539	117410	56678	0	551060	0	0	0	0	0	0	0	0	49663	0	0	89556	293840	1793600	0	0	0	0	0	0	0	0	0	0	0	0	0	2327000	682730	739070	1415100
P0DOY2	Immunoglobulin lambda constant 2	IGLC2	0	0	0	0	0	68548	187220	0	0	46406	58217	21183	1027800	104860	0	0	0	0	121150	0	0	0	0	146230	173480	0	43952	291470	216180	174410	102270	64408	0	40083	0	52749	53344	7701.4	48835	0	0	25866	0	8766700	5079600	7069200	2169000
P0DP25	Calmodulin-3	CALM3	0	0	0	0	0	0	0	16448	0	0	0	0	53435	0	17101	0	0	0	0	0	0	0	0	0	0	0	0	168190	1842800	2873200	0	0	0	0	0	76262	0	0	0	0	0	0	0	0	0	870660	49099
P0DP57	Secreted Ly-6/uPAR domain-containing protein 2	SLURP2	0	0	0	0	0	0	0	0	0	0	0	0	57161	0	0	0	0	0	0	0	0	0	0	0	0	0	0	16721	0	46495	0	0	0	0	0	0	0	0	0	0	0	0	0	0	0	0	0
P0DUB6	Alpha-amylase 1A	AMY1A	0	0	0	0	0	0	0	0	0	0	62585	0	0	0	0	3145400	27436	0	388540	22793	0	0	0	0	0	0	0	219160	0	0	0	0	0	0	0	0	119010	0	0	0	0	0	0	0	0	0	0
P10163	Basic salivary proline-rich protein 4	PRB4	0	0	0	0	0	0	0	0	0	0	0	0	208020	0	0	0	0	0	0	0	0	0	0	0	0	0	0	0	0	0	0	0	0	0	0	0	0	0	0	0	0	0	0	0	0	0	0
P10253	Lysosomal alpha-glucosidase	GAA	0	0	0	0	0	0	0	0	0	0	0	0	0	0	0	0	0	0	0	0	0	0	0	0	0	0	0	0	452050	0	0	0	0	0	0	0	0	0	0	0	0	0	0	0	0	0	0
P10301	Ras-related protein R-Ras	RRAS	0	0	0	0	0	0	0	0	0	0	0	0	0	0	0	0	0	0	0	0	0	0	0	0	0	0	0	0	0	0	49393	0	0	0	0	0	0	0	0	0	0	0	0	53625	0	0	24316
P10321	HLA class I histocompatibility antigen, C alpha chain	HLA-C	0	0	0	0	0	0	0	0	0	0	0	0	0	0	0	0	0	0	0	0	0	0	0	0	0	0	0	0	0	0	0	0	0	0	0	0	0	0	0	0	0	0	0	0	0	336250	0
P10412	Histone H1.4	H1-4	0	0	179950	0	0	0	0	0	0	0	0	0	0	0	0	0	0	0	0	0	0	64075	427570	3355000	6746400	4734200	2620900	410190	4346600	2958900	415350	3794000	3565400	1710500	2093700	2347700	0	0	0	0	0	0	0	13020000	8092900	2848200	865710
P10599	Thioredoxin	TXN	14090	38590	18006	0	0	896580	862020	1520400	214700	2747100	1077600	605740	2173800	2184300	0	502830	821360	2221800	1658900	439020	645420	962760	1273400	508030	620850	1232600	6017300	2677300	5605800	4364800	1789400	1485600	1281700	1454200	697000	1324900	2130500	232770	597390	488510	217590	461210	267740	93319	112900	0	0
P10619	Lysosomal protective protein	CTSA	0	0	0	0	0	0	71134	47291	0	43308	0	0	0	0	0	0	0	0	0	0	0	0	0	0	0	0	15725	0	886390	0	0	0	0	0	0	0	0	0	0	0	0	0	0	0	0	0	0
P10620	Microsomal glutathione S-transferase 1	MGST1	0	0	0	0	0	0	0	0	0	0	0	0	0	0	0	0	0	0	0	0	0	0	0	61517	0	0	0	0	45516	0	45624	0	0	0	0	0	0	0	0	0	0	0	0	0	0	0	112660
P10643	Complement component C7	C7	0	0	0	0	0	0	0	0	0	0	0	0	0	0	0	0	0	0	0	0	0	0	0	0	0	0	0	0	0	0	0	0	0	0	0	0	0	0	0	0	0	0	0	0	0	198610	87871
P10768	S-formylglutathione hydrolase	ESD	0	0	0	0	0	0	0	0	0	0	0	0	0	0	0	0	0	0	0	0	0	0	0	0	0	0	0	0	0	0	0	0	0	0	0	0	0	0	0	0	0	0	0	122230	0	0	0
P10809	60 kDa heat shock protein, mitochondrial	HSPD1	0	0	0	0	0	0	0	0	0	0	0	0	0	0	0	0	0	0	0	0	0	0	0	0	0	0	0	0	0	174750	0	0	0	0	0	0	0	0	0	0	0	0	0	159530	81290	44937	0
P10909	Clusterin	CLU	0	0	0	0	0	0	0	0	0	0	0	0	0	0	0	0	0	50634	0	0	0	0	19943	0	116710	395710	0	0	0	0	0	26509	0	0	100980	60144	0	0	0	0	0	0	0	459570	0	396210	250990
P10916	Myosin regulatory light chain 2	MYL2	0	0	0	0	0	0	0	0	0	0	0	0	0	0	0	97977	0	0	0	0	297600	200260	0	47692	0	131670	0	0	0	0	0	0	0	0	0	0	0	0	0	0	0	0	0	0	0	0	0
P11021	Endoplasmic reticulum chaperone BiP	HSPA5	0	0	0	0	0	41747	52228	58743	0	178530	50036	0	187260	185730	0	0	0	77927	95096	32595	50514	0	0	0	0	0	47468	0	1484600	3900400	116120	72559	37267	45769	0	0	21120	0	62356	73005	0	0	0	2104900	422400	5620100	1243700
P11047	Laminin subunit gamma-1	LAMC1	0	0	0	0	0	0	0	0	0	0	0	0	0	0	0	0	0	0	0	0	0	0	0	0	0	0	0	0	0	0	99154	0	0	0	29680	0	0	0	0	0	0	0	0	49460	56005	141780	252680
P11055	Myosin-3	MYH3	0	0	0	0	0	0	0	0	0	0	0	0	0	0	0	511850	0	0	0	0	3132200	3079000	0	1582100	0	2722700	0	0	0	0	0	0	0	0	5132500	0	0	0	0	0	0	0	0	0	0	0	0
P11142	Heat shock cognate 71 kDa protein	HSPA8	0	0	0	0	0	12358	0	136170	0	62358	269510	190210	161030	149790	0	2081100	0	0	0	0	61700	105620	0	18496	91445	38994	0	546270	2118100	3260700	69921	0	0	39303	64635	140860	0	0	0	0	0	0	0	1920500	480020	3270500	2015100
P11166	Solute carrier family 2	SLC2A1	0	0	0	0	0	0	0	0	0	0	0	0	0	0	0	0	0	0	0	0	0	0	0	311520	1272500	1801400	46537	0	1197400	452990	0	847880	756440	241310	0	1052700	0	0	0	0	0	0	0	42647	90327	0	0
P11216	Glycogen phosphorylase, brain form	PYGB	0	0	0	0	0	0	0	0	0	0	0	0	0	0	0	0	0	0	0	0	0	0	0	0	0	0	0	0	88981	0	0	0	0	0	0	0	0	0	0	0	0	0	0	0	0	0	0
P11217	Glycogen phosphorylase, muscle form	PYGM	0	0	0	0	0	0	0	0	0	0	0	0	0	0	0	20168000	0	0	0	0	310840	583850	0	399000	0	214230	0	0	0	201780	0	0	0	0	1071000	36548	629310	0	0	0	0	0	0	0	0	0	0
P11234	Ras-related protein Ral-B	RALB	0	0	0	0	0	0	0	0	0	0	0	0	0	0	0	0	0	0	0	0	0	0	0	0	0	0	0	0	0	0	0	0	0	0	0	0	0	0	0	0	0	0	0	120770	33170	0	0
P11277	Spectrin beta chain, erythrocytic	SPTB	0	0	0	0	0	0	0	0	0	0	0	0	0	0	0	0	0	0	0	0	0	0	0	0	0	0	0	0	0	23421	0	0	0	0	0	0	0	0	0	0	0	0	0	0	39196	200870	87514
P11279	Lysosome-associated membrane glycoprotein 1	LAMP1	0	0	0	0	0	0	0	26398	0	0	0	0	0	0	0	0	0	0	0	0	0	0	0	0	0	0	0	48451	637260	67430	0	0	0	0	0	0	0	0	0	0	0	0	0	0	0	0	0
P11498	Pyruvate carboxylase, mitochondrial	PC	0	0	0	0	0	0	0	0	0	0	0	0	0	0	0	0	0	0	0	0	0	0	0	0	0	0	0	0	0	0	0	0	0	0	0	0	0	0	0	0	0	0	0	0	0	0	0
P11586	C-1-tetrahydrofolate synthase, cytoplasmic	MTHFD1	0	0	0	0	0	0	0	0	0	0	0	0	0	0	0	0	0	0	0	0	0	0	0	0	0	0	0	0	0	0	0	0	0	0	0	0	0	0	0	0	0	0	0	36867	7146.5	99448	244940
P11766	Alcohol dehydrogenase class-3	ADH5	0	0	0	0	0	0	0	0	0	0	0	0	0	0	0	0	0	0	0	0	0	0	0	0	0	0	0	0	0	0	0	0	0	0	0	0	0	0	0	0	0	0	0	139570	44696	0	170720
P11940	Polyadenylate-binding protein 1	PABPC1	0	0	0	0	0	0	0	0	0	0	0	0	0	0	0	0	0	0	0	0	0	0	0	0	0	0	0	0	36969	176450	0	0	0	0	0	0	0	0	0	0	0	0	0	0	0	0	0
P12081	Histidine--tRNA ligase, cytoplasmic	HARS1	0	0	0	0	0	0	0	0	0	0	0	0	30281	0	0	0	0	0	29832	0	0	0	0	0	0	0	23784	0	0	253260	0	0	0	0	0	0	0	0	0	0	0	0	0	0	0	0	0
P12109	Collagen alpha-1(VI) chain	COL6A1	0	0	461860	0	0	0	0	0	0	0	0	0	0	0	0	0	0	0	0	0	16814	0	2926200	7705900	657560	4076400	538530	61213	193030	1675200	564390	138690	66029	12243	1434800	278070	10143	0	0	0	0	0	0	11046000	2447900	12662000	24807000
P12110	Collagen alpha-2(VI) chain	COL6A2	0	0	1399000	0	0	0	0	0	263090	0	0	0	0	0	0	0	0	0	0	0	191640	0	2651500	5462200	1408600	2472000	859880	661360	734440	2216000	2316400	359470	168430	407090	3462700	1937600	77919	0	0	0	0	0	0	2759500	629760	5156100	21004000
P12111	Collagen alpha-3(VI) chain	COL6A3	8006.5	19578	1646600	0	0	0	0	0	1123600	0	0	0	0	0	0	0	0	0	0	0	407260	411540	9426200	22394000	5389000	10087000	1259100	1958300	2407100	4632800	4962100	3388500	1711700	1097100	7316400	5628900	944190	0	52091	0	0	0	0	36346000	18453000	42541000	86743000
P12235	ADP/ATP translocase 1	SLC25A4	0	0	0	0	0	0	0	0	0	0	0	0	0	0	0	104060	0	0	0	0	0	0	0	0	0	37805	0	0	0	0	0	0	0	0	219090	0	0	0	0	0	0	0	0	0	0	0	0
P12236	ADP/ATP translocase 3	SLC25A6	0	0	0	0	0	0	0	0	0	0	0	0	0	0	0	196430	0	0	0	0	0	0	0	0	0	307790	0	0	267450	326130	0	0	0	0	59694	0	0	0	0	0	0	0	0	101360	149460	142790	131590
P12273	Prolactin-inducible protein	PIP	0	0	0	0	0	0	389090	0	419320	400580	72996	72372	1128500	554900	28230	573430	94933	15949000	491470	88543	51445	484970	882320	29992	59937	48553	413940	250840	875630	55682	249580	291320	286280	134300	36713	171580	386730	230620	241350	74176	66761	116450	97893	0	0	0	0
P12277	Creatine kinase B-type	CKB	0	0	0	0	0	0	0	0	0	0	0	0	0	0	0	0	0	0	0	0	0	0	0	0	0	0	0	55818	68303	0	0	0	0	0	0	0	0	0	0	0	0	0	0	0	0	0	0
P12429	Annexin A3	ANXA3	0	0	0	0	0	0	0	0	0	0	0	0	0	0	0	0	0	0	0	0	0	0	0	17444	0	0	0	21380	5248400	29704	0	48104	0	0	0	0	0	0	0	0	0	0	0	508930	78244	0	372280
P12532	Creatine kinase U-type, mitochondrial	CKMT1A	0	0	0	0	0	0	0	0	0	0	0	0	0	0	0	62484	0	0	0	0	0	0	0	0	0	0	44392	0	4603400	0	0	0	0	0	0	0	0	0	0	0	0	0	0	0	0	0	0
P12814	Alpha-actinin-1	ACTN1	0	0	0	0	0	0	0	0	0	0	31380	0	126860	54455	0	344160	0	0	0	0	0	0	0	0	27929	68538	36466	40486	7502300	2167500	104810	21851	0	0	0	0	0	0	0	0	0	0	0	265700	193200	1451100	344080
P12830	Cadherin-1	CDH1	0	0	0	0	0	0	0	0	0	0	0	0	0	0	0	0	0	0	0	0	0	0	0	0	0	0	0	0	567820	0	0	0	0	0	0	0	0	0	0	0	0	0	0	0	0	0	0
P12882	Myosin-1	MYH1	0	0	20548	0	0	0	21067	2280600	0	0	0	0	0	0	0	203290000	0	0	0	0	15718000	10038000	0	9147700	0	14457000	0	34497	0	0	71156	0	0	0	37765000	0	0	0	0	0	0	0	0	0	0	0	0
P12883	Myosin-7	MYH7	0	55303	0	0	0	0	133140	640250	0	0	0	0	0	0	0	3768500	0	0	0	0	24524000	13222000	0	7140000	0	13224000	0	0	0	0	76322	0	0	0	19725000	0	0	0	0	0	0	0	0	0	0	0	0
P12955	Xaa-Pro dipeptidase	PEPD	0	0	0	0	0	0	0	0	0	0	0	0	0	0	0	0	0	0	0	0	0	0	0	0	0	0	0	0	0	0	0	0	0	0	0	0	0	0	0	0	0	0	0	0	0	0	0
P12956	X-ray repair cross-complementing protein 6	XRCC6	0	0	0	0	0	0	0	0	0	0	0	0	0	0	0	0	0	0	0	0	0	0	0	0	0	0	0	0	0	65542	0	0	0	0	0	0	0	0	0	0	0	0	0	221150	0	235660	45103
P13473	Lysosome-associated membrane glycoprotein 2	LAMP2	0	0	0	0	0	0	0	0	0	0	0	0	0	0	0	0	0	0	0	0	0	0	0	0	0	0	0	0	549350	47028	0	0	0	0	0	0	29816	0	0	0	0	0	0	0	0	0	0
P13489	Ribonuclease inhibitor	RNH1	0	0	0	0	0	0	0	0	0	0	0	0	0	0	0	0	0	0	0	0	0	0	0	0	0	0	0	0	48783	259860	12824	0	0	0	0	0	0	0	0	0	0	0	0	169750	0	0	0
P13535	Myosin-8	MYH8	0	0	0	0	0	0	0	15620	0	0	0	0	0	0	0	5184000	0	0	0	0	0	0	0	0	0	0	0	0	0	0	0	0	0	0	0	0	0	0	0	0	0	0	0	0	0	0	0
P13639	Elongation factor 2	EEF2	0	0	0	0	0	27639	21704	58658	0	169010	212060	0	166550	50094	0	0	0	0	82835	0	0	0	0	0	0	0	49248	303250	266550	1689800	0	0	0	7851.3	15141	0	134700	0	0	0	0	0	0	286450	0	109150	0
P13667	Protein disulfide-isomerase A4	PDIA4	0	0	0	0	0	0	0	0	0	0	0	0	0	0	0	0	0	0	0	0	0	0	0	0	0	0	0	0	0	37231	0	0	0	0	0	0	0	0	0	0	0	0	0	755130	0	555920	0
P13693	Translationally-controlled tumor protein	TPT1	0	0	0	0	0	0	0	0	0	0	0	0	0	0	0	33746	0	0	0	0	0	0	0	0	0	0	0	0	123800	226010	0	0	0	0	0	0	0	0	0	0	0	0	0	0	0	0	0
P13796	Plastin-2	LCP1	0	0	0	0	0	0	0	0	0	0	0	0	99794	0	0	0	0	0	0	0	0	0	0	0	0	0	0	0	0	0	0	0	0	0	0	0	0	0	0	0	0	0	0	92536	0	0	0
P13797	Plastin-3	PLS3	0	0	0	0	0	0	0	0	0	0	0	0	0	0	0	0	0	0	0	0	0	0	0	0	0	0	0	0	20127	347170	0	0	0	0	0	0	0	0	0	0	0	0	0	175770	0	225170	25651
P13798	Acylamino-acid-releasing enzyme	APEH	0	0	0	0	0	0	0	0	0	0	0	0	0	0	0	0	0	0	0	0	0	0	0	0	0	0	0	0	525910	19684	0	0	0	0	0	0	0	0	0	0	0	0	0	0	0	0	0
P13804	Electron transfer flavoprotein subunit alpha, mitochondrial	ETFA	0	0	0	0	0	0	0	0	0	0	0	0	0	0	0	0	0	0	0	0	0	0	0	0	0	0	0	0	0	0	0	0	0	0	0	0	0	0	0	0	0	0	0	90649	56119	25693	0
P13805	Troponin T, slow skeletal muscle	TNNT1	0	0	0	0	0	0	0	0	0	0	0	0	0	0	0	0	0	0	0	0	361350	131700	0	0	0	0	0	0	0	0	0	0	0	0	145270	0	0	0	0	0	0	0	0	0	0	0	0
P13866	Sodium/glucose cotransporter 1	SLC5A1	0	0	0	0	0	0	0	0	0	0	0	0	0	0	0	0	0	0	0	0	0	0	0	0	0	0	0	0	99551	0	0	0	0	0	0	0	0	0	0	0	0	0	0	0	0	0	0
P13929	Beta-enolase	ENO3	0	0	0	0	0	0	0	37698	0	0	0	0	0	0	0	9825700	0	0	0	0	0	0	0	0	0	0	0	46473	0	257600	0	0	0	0	76946	0	25201	0	0	0	0	0	0	0	0	53047	0
P14324	Farnesyl pyrophosphate synthase	FDPS	0	0	0	0	0	0	0	0	0	0	0	0	0	0	0	0	0	0	0	0	0	0	0	0	0	0	0	0	0	23749	0	0	0	0	0	0	0	0	0	0	0	0	0	0	0	0	0
P14384	Carboxypeptidase M	CPM	0	0	0	0	0	0	0	0	0	0	0	0	0	0	0	0	0	0	0	0	0	0	0	0	0	0	0	0	0	132440	0	0	0	0	0	0	0	0	0	0	0	0	0	0	0	0	0
P14543	Nidogen-1	NID1	0	0	0	0	0	0	0	0	0	0	0	0	0	0	0	0	0	0	0	0	0	0	0	0	0	0	0	0	0	0	51272	0	0	0	0	0	0	0	0	0	0	0	0	33650	63075	0	139400
P14618	Pyruvate kinase PKM	PKM	0	0	0	0	0	0	28250	12085	0	42029	202240	0	487770	183330	0	13672000	19336	67784	0	27303	94308	22658	0	31339	0	0	19200	169450	1038300	6757000	18967	0	95848	0	62140	0	45674	0	0	0	0	0	0	206910	0	2220500	905180
P14625	Endoplasmin	HSP90B1	0	0	0	0	0	0	0	0	0	0	0	0	0	0	0	0	0	0	0	0	0	0	0	0	0	0	0	0	0	198260	0	0	0	0	0	0	0	0	0	0	0	0	0	858120	219650	2700400	970550
P14649	Myosin light chain 6B	MYL6B	0	0	0	0	0	0	0	0	0	0	0	0	0	0	0	0	0	0	0	0	40171	33800	0	0	0	0	0	0	0	0	0	0	0	0	102000	0	0	0	0	0	0	0	0	0	0	0	0
P14678	Small nuclear ribonucleoprotein-associated proteins B and B	SNRPB	0	0	0	0	0	0	0	0	0	0	0	0	0	0	0	0	0	0	0	0	0	0	0	23226	0	0	0	0	30886	121230	0	0	0	0	0	0	0	0	0	0	0	0	0	0	0	0	0
P14735	Insulin-degrading enzyme	IDE	0	0	0	0	0	0	0	0	0	0	0	0	0	0	0	0	0	0	0	0	0	0	0	0	0	0	0	0	1912800	5541800	0	0	0	0	0	0	88419	0	0	0	0	0	0	0	0	0	0
P14866	Heterogeneous nuclear ribonucleoprotein L	HNRNPL	0	0	0	0	0	0	0	0	0	0	0	0	0	0	0	0	0	0	0	0	0	0	0	0	0	0	0	0	0	0	0	0	0	0	0	0	0	0	0	0	0	0	0	81173	0	0	0
P14923	Junction plakoglobin	JUP	59018	97084	1857400	274900	0	4314600	3552200	9947100	1279300	9929000	6912000	3254900	11935000	13777000	448760	3841400	5964200	7709400	10833000	2376500	1949200	4115400	3927800	2143200	2573000	3072100	11944000	21452000	32432000	13801000	3220500	3479300	6356500	6403600	3939200	4036700	14884000	1218700	3133900	2722400	966750	1827200	2147000	0	52302	0	0
P15088	Mast cell carboxypeptidase A	CPA3	0	0	0	0	0	0	0	0	0	0	0	0	0	0	0	0	0	0	0	0	0	0	0	640020	0	0	0	0	0	0	0	0	0	0	0	0	0	0	0	0	0	0	0	510440	58356	37790	297300
P15090	Fatty acid-binding protein, adipocyte	FABP4	0	0	0	0	0	0	0	0	0	0	0	0	0	0	0	0	0	0	0	0	0	0	0	0	0	0	0	0	363860	0	0	0	0	0	0	0	0	0	0	0	0	0	0	2777900	2326300	949510	15890000
P15104	Glutamine synthetase	GLUL	0	0	0	0	0	0	0	0	0	0	0	0	0	0	0	0	0	0	0	0	0	0	0	0	0	0	0	0	3969500	1364100	0	0	0	0	0	0	0	0	0	0	0	0	0	0	0	0	0
Q8IYD1	Eukaryotic peptide chain release factor GTP-binding subunit ERF3B	GSPT2	0	0	0	0	0	0	0	0	0	0	0	0	0	0	0	0	0	0	0	0	0	0	0	0	0	0	0	0	0	19997	0	0	0	0	0	0	0	0	0	0	0	0	0	0	0	0	0
P15259	Phosphoglycerate mutase 2	PGAM2	0	0	0	0	0	0	0	0	0	0	0	0	0	0	0	681860	0	0	0	0	0	0	0	0	0	0	0	0	0	0	0	0	0	0	0	0	0	0	0	0	0	0	0	0	0	0	0
P15289	Arylsulfatase A;Arylsulfatase A component B;Arylsulfatase A component C	ARSA	0	0	0	0	0	0	0	0	0	0	0	0	0	0	0	0	0	0	0	0	0	0	0	0	0	0	0	0	12047	0	0	0	0	0	0	0	0	0	0	0	0	0	0	0	0	0	0
P15309	Prostatic acid phosphatase;PAPf39	ACP3	0	0	0	0	0	0	0	0	0	0	0	0	0	0	0	0	0	0	0	0	0	0	0	0	0	0	0	0	2104100	352540	37954	7691.7	0	0	0	0	0	0	0	0	0	0	0	0	0	0	0
P15311	Ezrin	EZR	0	0	0	0	0	0	0	0	0	0	0	0	0	0	0	0	0	0	0	0	0	0	0	67273	0	0	0	0	104280	56892	0	0	0	0	0	0	0	0	0	0	0	0	0	89807	0	137890	729490
P15502	Elastin	ELN	0	0	0	0	0	0	0	0	0	0	0	0	0	0	0	0	0	0	0	0	0	0	0	58941	0	0	0	217890	0	0	0	0	465600	33621	0	0	0	0	479700	0	0	0	0	0	0	0	0
P15531	Nucleoside diphosphate kinase A	NME1	0	0	0	0	0	0	0	0	0	0	0	0	0	0	0	0	0	0	0	0	0	0	0	0	0	0	0	30420	28321	128510	0	0	0	0	0	0	0	0	0	0	0	0	0	0	0	0	70211
P15559	NAD(P)H dehydrogenase [quinone] 1	NQO1	0	0	0	0	0	0	0	0	0	0	0	0	0	0	0	0	0	0	0	0	0	0	0	0	0	0	0	0	0	0	26228	0	0	0	0	0	0	0	0	0	0	0	0	0	0	0	0
P15586	N-acetylglucosamine-6-sulfatase	GNS	0	0	0	0	0	0	0	0	0	0	0	0	0	0	0	0	0	0	0	0	0	0	0	0	0	0	0	0	222470	0	0	0	0	0	0	0	0	0	0	0	0	0	0	0	0	0	0
P15924	Desmoplakin	DSP	156420	259420	2735200	1239300	184800	13352000	25349000	55732000	1593300	42174000	30585000	9907100	34452000	43339000	1057100	13625000	15761000	23238000	28413000	9144600	8689700	13984000	9213500	8304500	4046100	11033000	29201000	50330000	78953000	51319000	11015000	9351800	17612000	17931000	9918600	8113300	34371000	3747700	11042000	12175000	2658100	5089300	4752700	0	0	0	0
P16070	CD44 antigen	CD44	0	0	0	0	0	0	0	0	0	0	0	0	0	0	0	0	0	0	0	0	0	0	0	0	0	67689	0	0	0	0	0	0	0	6116.9	34897	0	0	0	0	0	0	0	0	0	0	0	0
P16104	Histone H2AX	H2AX	0	0	0	0	0	0	0	0	0	0	0	0	0	0	0	0	0	0	0	0	0	0	0	0	0	0	0	0	0	0	0	0	0	0	0	0	0	0	0	0	0	0	0	0	0	10576	20028
P16152	Carbonyl reductase [NADPH] 1	CBR1	0	0	0	0	0	0	0	0	0	0	0	0	0	0	0	0	0	0	0	0	0	0	0	0	0	0	0	0	0	347240	0	0	0	0	0	0	0	0	0	0	0	0	0	0	0	164260	0
P16157	Ankyrin-1	ANK1	0	0	0	0	0	0	0	0	0	0	0	0	0	0	0	0	0	0	0	0	0	0	0	0	0	0	0	0	0	0	0	0	0	0	0	64844	0	0	0	0	0	0	0	232430	195600	321800	445960
P16219	Short-chain specific acyl-CoA dehydrogenase, mitochondrial	ACADS	0	0	0	0	0	0	0	0	0	0	0	0	0	0	0	0	0	0	0	0	0	0	0	0	0	0	0	0	0	0	0	0	0	0	0	0	0	0	0	0	0	0	0	0	0	0	78068
P16284	Platelet endothelial cell adhesion molecule	PECAM1	0	0	0	0	0	0	0	0	0	0	0	0	0	0	0	0	0	0	0	0	0	0	0	0	0	0	0	0	0	0	0	0	0	0	0	0	0	0	0	0	0	0	0	67328	0	28099	0
P16401	Histone H1.5	H1-5	0	0	0	0	0	0	0	0	0	0	0	0	13130	0	0	0	0	0	0	0	0	0	50923	130670	14951	331840	88262	10857	298400	0	130120	890590	0	30868	25537	123940	0	0	0	0	0	0	0	406160	21948	520780	0
P16402	Histone H1.3	H1-3	0	0	0	0	0	0	0	0	0	0	0	0	0	0	0	0	0	0	0	0	0	0	0	0	281150	63960	19862	0	72116	0	0	354280	0	0	0	0	0	0	0	0	0	0	0	537890	240350	0	0
P16403	Histone H1.2	H1-2	58901	0	0	0	0	0	0	0	0	0	0	0	0	0	0	0	0	0	0	0	0	0	182030	671790	1077400	742960	371410	503620	1134700	0	894450	1430800	780050	0	1905500	0	0	0	0	0	0	0	0	1478900	849200	0	0
P16452	Protein 4.2	EPB42	0	0	0	0	0	0	0	0	0	0	0	0	0	0	0	0	0	0	0	0	0	0	0	0	0	29833	0	0	0	0	0	0	0	0	0	0	0	0	0	0	0	0	0	604500	402060	0	359000
P16671	Platelet glycoprotein 4	CD36	0	0	0	0	0	0	0	0	0	0	0	0	0	0	0	0	0	0	0	0	0	0	0	0	0	0	0	0	0	0	53907	0	0	0	0	0	0	0	0	0	0	0	0	607130	264290	0	97089
P17050	Alpha-N-acetylgalactosaminidase	NAGA	0	0	0	0	0	0	0	0	0	0	0	0	0	0	0	0	0	0	0	0	0	0	0	0	0	0	0	0	325560	0	0	0	0	0	0	0	0	0	0	0	0	0	0	0	0	0	0
P17066	Heat shock 70 kDa protein 6	HSPA6	0	0	0	0	0	0	0	63383	0	0	83207	40663	70948	43961	0	235780	0	0	0	28827	0	46194	0	0	0	48003	0	61023	643220	612370	44705	43747	75265	0	0	0	40271	0	20221	0	0	0	0	70258	0	0	0
P17174	Aspartate aminotransferase, cytoplasmic	GOT1	0	0	0	0	0	0	0	14606	0	0	0	0	0	0	0	571550	0	0	0	0	0	0	0	0	0	0	0	0	35536	177840	0	0	0	0	0	0	0	0	0	0	0	0	0	0	0	0	45278
P17302	Gap junction alpha-1 protein	GJA1	0	0	0	0	0	0	0	0	0	0	0	0	0	0	0	0	0	0	0	0	0	0	0	0	0	0	0	0	187260	0	0	0	0	0	0	0	0	0	0	0	0	0	0	0	0	0	0
P17540	Creatine kinase S-type, mitochondrial	CKMT2	0	0	0	0	0	0	0	0	0	0	0	0	0	0	0	369020	0	0	0	0	0	33435	0	0	0	46201	0	0	0	0	0	0	0	0	76190	0	0	0	0	0	0	0	0	0	0	0	0
P17655	Calpain-2 catalytic subunit	CAPN2	0	0	0	0	0	0	0	0	0	0	0	0	0	0	0	0	0	0	0	0	0	0	0	0	0	0	0	0	68657	0	0	0	0	0	0	0	0	0	0	0	0	0	0	0	0	0	26266
P17661	Desmin	DES	0	0	0	0	0	0	0	0	0	0	0	0	0	0	0	4281300	0	0	0	0	660310	380020	0	99324	0	388330	0	0	0	0	0	0	59655	0	6417800	0	0	0	0	0	0	0	0	0	0	715660	0
P17858	ATP-dependent 6-phosphofructokinase, liver type	PFKL	0	0	0	0	0	0	0	11488	0	0	0	0	0	0	0	0	0	0	0	0	0	0	0	0	0	0	0	0	36825	0	0	0	0	0	0	0	0	0	0	0	0	0	0	0	36667	0	70092
P17900	Ganglioside GM2 activator	GM2A	0	0	0	0	0	0	20921	29724	0	50332	0	0	45048	68336	0	0	0	181820	36989	22354	28905	0	0	0	0	0	110070	46033	1516400	367720	222260	0	62077	0	0	0	19722	0	0	0	0	0	0	0	0	0	0
P17931	Galectin-3	LGALS3	0	0	0	0	0	0	41245	26989	0	0	106890	0	129100	60817	0	0	0	0	0	0	0	0	0	0	0	0	55720	19412	500060	0	0	0	0	0	0	0	11244	0	0	0	0	0	0	0	0	0	0
P17980	26S proteasome regulatory subunit 6A	PSMC3	0	0	0	0	0	0	0	0	0	0	0	0	0	0	0	0	0	0	0	0	0	0	0	0	0	0	0	0	0	36381	0	0	0	0	0	0	0	0	0	0	0	0	0	0	0	0	0
P18085	ADP-ribosylation factor 4	ARF4	0	0	0	0	0	0	0	0	0	0	0	0	0	0	0	0	0	0	0	0	0	0	0	0	0	0	0	0	43005	77584	0	0	0	0	0	0	0	0	0	0	0	0	0	0	0	0	0
P18124	Large ribosomal subunit protein uL30	RPL7	0	0	0	0	0	0	0	0	0	0	0	0	0	0	0	0	0	0	0	0	0	0	0	163380	95290	55136	0	0	0	0	106870	61409	0	27253	121010	18349	0	0	0	0	0	0	0	260930	11659	0	0
P18206	Vinculin	VCL	0	0	0	0	0	25046	19163	83999	0	84346	32053	0	78568	67486	0	0	0	65234	39061	0	0	10203	0	0	0	0	158230	58705	3577800	157380	55897	0	0	0	0	0	16980	0	0	0	0	0	0	341360	389710	756340	1178100
P18510	Interleukin-1 receptor antagonist protein	IL1RN	0	0	0	0	0	0	0	0	0	0	70918	0	0	0	0	0	0	0	0	0	0	0	0	0	0	0	0	0	124140	55101	0	0	0	0	0	0	0	0	0	0	0	0	0	0	0	0	0
P18669	Phosphoglycerate mutase 1	PGAM1	0	0	0	0	0	0	0	0	0	0	0	0	0	0	0	2045500	0	0	0	0	82101	124260	0	0	0	0	0	0	157220	290350	0	0	0	0	202400	0	0	0	0	0	0	0	0	0	0	570430	518830
P19237	Troponin I, slow skeletal muscle	TNNI1	0	0	0	0	0	0	0	0	0	0	0	0	0	0	0	0	0	0	0	0	2028800	0	0	0	0	0	0	0	0	0	0	0	0	0	2102700	0	0	0	0	0	0	0	0	0	0	0	0
P19338	Nucleolin	NCL	0	0	0	0	0	0	0	0	0	0	0	0	0	0	0	0	0	0	0	0	0	0	0	0	0	0	0	0	0	0	0	0	0	0	0	0	0	0	0	0	0	0	0	175830	85464	102130	0
P19652	Alpha-1-acid glycoprotein 2	ORM2	0	0	0	0	0	0	0	0	0	0	0	0	0	0	0	0	0	0	0	0	0	0	0	0	23725	0	0	0	0	0	0	0	0	0	0	0	0	0	0	0	0	0	0	22539	0	185740	0
P19823	Inter-alpha-trypsin inhibitor heavy chain H2	ITIH2	0	0	0	0	0	0	0	0	0	0	0	0	0	0	0	0	0	0	0	0	0	0	0	0	0	0	0	0	0	0	0	0	0	0	0	0	0	0	0	0	0	0	0	460380	21181	1666700	458120
P19827	Inter-alpha-trypsin inhibitor heavy chain H1	ITIH1	0	0	0	0	0	0	0	0	0	0	0	0	0	0	0	0	0	0	0	0	0	0	0	0	24624	0	0	0	0	0	0	0	0	0	0	0	0	0	0	0	0	0	0	430210	226160	379220	38264
P19971	Thymidine phosphorylase	TYMP	0	0	0	0	0	0	0	0	0	0	0	0	0	0	0	0	0	0	0	0	0	0	0	0	0	0	0	0	227500	1159100	0	0	0	0	0	0	0	0	0	0	0	0	0	0	0	0	0
P20020	Plasma membrane calcium-transporting ATPase 1	ATP2B1	0	0	0	0	0	0	0	0	0	0	0	0	0	0	0	0	0	0	0	0	0	0	0	0	0	0	0	0	0	0	0	0	0	0	0	0	0	0	0	0	0	0	0	0	0	0	0
P20073	Annexin A7	ANXA7	0	0	0	0	0	0	0	17841	0	0	0	0	0	29052	0	0	0	0	0	0	0	0	0	0	0	0	0	0	93746	52065	0	0	0	0	0	0	0	0	0	0	0	0	0	85863	0	0	0
P20340	Ras-related protein Rab-6A	RAB6A	0	0	0	0	0	0	0	0	0	0	0	0	0	0	0	161210	0	0	0	0	0	0	0	0	0	0	0	0	186250	138720	0	0	0	0	0	0	36981	0	0	0	0	0	0	181890	0	0	162440
P20618	Proteasome subunit beta type-1	PSMB1	0	0	0	0	0	57663	0	17764	0	98158	0	0	39811	0	0	0	0	29675	73089	0	0	0	0	0	0	40871	38715	0	1448800	247160	0	76784	0	0	0	0	47886	0	0	0	0	0	0	0	0	0	0
P20700	Lamin-B1	LMNB1	0	0	0	0	0	0	0	0	0	0	0	0	0	0	0	0	0	0	0	0	0	0	0	0	0	0	0	0	0	67460	0	0	0	0	0	0	0	0	0	0	0	0	0	222940	0	187320	69840
P20774	Mimecan	OGN	0	0	0	0	0	0	0	0	35510	0	0	0	0	0	0	0	0	0	0	0	79035	0	377650	1896800	642320	409260	391230	0	1174800	1298400	0	34361	0	0	369170	1352000	39303	0	89968	0	0	0	0	4526600	494630	112350	1530900
P20810	Calpastatin	CAST	0	0	0	0	0	0	0	0	0	0	0	0	0	0	0	0	0	0	0	0	0	0	0	0	0	0	0	0	24787	0	0	0	0	0	0	0	0	0	0	0	0	0	0	0	0	0	0
P20908	Collagen alpha-1(V) chain	COL5A1	0	0	0	0	0	0	0	0	0	0	0	0	0	0	0	0	0	0	0	0	0	0	0	705040	999820	555260	0	0	0	0	0	0	0	0	0	0	0	0	0	0	0	0	0	0	0	48311	0
P20929	Nebulin	NEB	0	0	0	0	0	0	0	0	0	0	0	0	0	0	0	6903700	0	0	0	0	132230	0	0	0	0	0	0	0	0	0	0	0	0	0	102910	0	0	0	0	0	0	0	0	0	0	0	0
P20933	N(4)-(beta-N-acetylglucosaminyl)-L-asparaginase	AGA	0	0	0	0	0	23516	47093	47941	0	0	0	0	0	69556	0	0	0	59109	0	0	0	0	0	0	0	0	0	52001	96242	0	0	0	0	0	0	0	51939	0	0	0	0	0	0	0	0	0	0
P60891	Ribose-phosphate pyrophosphokinase 1	PRPS1	0	0	0	0	0	0	0	0	0	0	0	0	0	0	0	0	0	0	0	0	0	0	0	0	0	0	0	0	0	0	0	0	0	0	0	0	0	0	0	0	0	0	0	34328	0	0	0
P21281	V-type proton ATPase subunit B, brain isoform	ATP6V1B2	0	0	0	0	0	0	0	0	0	0	0	0	0	0	0	0	0	0	0	0	0	0	0	0	0	0	0	0	324700	203370	0	0	0	0	0	0	0	0	0	0	0	0	0	0	0	0	0
P21291	Cysteine and glycine-rich protein 1	CSRP1	0	0	0	0	0	0	0	0	0	0	0	0	0	0	0	0	0	0	0	0	0	0	0	0	46415	0	0	0	212500	0	0	0	0	0	0	0	0	0	0	0	0	0	0	175710	78333	108920	0
P21333	Filamin-A	FLNA	0	0	0	0	0	0	0	0	0	0	0	0	12659	0	0	216750	0	0	0	0	16042	0	0	117000	0	76771	0	0	3031100	233370	0	0	0	0	71137	0	0	0	0	0	0	0	0	1785400	1534900	3560300	1412200
P21397	Amine oxidase [flavin-containing] A	MAOA	0	0	0	0	0	0	0	0	0	0	0	0	0	0	0	0	0	0	0	0	0	0	0	0	0	0	0	0	0	0	127390	0	0	0	0	0	0	0	0	0	0	0	0	0	113940	0	40538
P21399	Cytoplasmic aconitate hydratase	ACO1	0	0	0	0	0	0	0	0	0	0	0	0	0	0	0	0	0	0	0	0	0	0	0	0	0	0	0	0	0	0	0	0	0	0	0	0	0	0	0	0	0	0	0	104260	0	0	240880
P21589	5-nucleotidase	NT5E	0	0	0	0	0	0	0	0	0	0	0	0	0	0	0	0	0	0	0	0	0	0	0	0	0	0	0	0	0	0	0	0	0	0	0	0	0	0	0	0	0	0	0	18843	0	0	0
P21675	Transcription initiation factor TFIID subunit 1	TAF1	0	0	0	0	0	0	0	0	0	0	0	0	0	0	0	0	0	0	0	0	0	0	0	0	0	0	0	0	0	0	0	0	0	0	0	0	0	0	0	0	0	0	0	0	0	0	186690
P21695	Glycerol-3-phosphate dehydrogenase [NAD(+)], cytoplasmic	GPD1	0	0	0	0	0	0	0	0	0	0	0	0	0	0	0	909730	0	0	0	0	0	0	0	0	0	0	53864	0	122330	0	0	0	0	0	39291	0	0	0	0	0	0	0	0	417990	174170	102850	1642300
P21796	Voltage-dependent anion-selective channel protein 1	VDAC1	0	0	0	0	0	0	0	0	0	0	0	0	0	0	0	113560	0	0	0	0	0	0	0	0	0	0	0	0	958040	248630	0	0	0	0	0	0	0	0	0	0	0	0	0	0	71927	0	0
P21810	Biglycan	BGN	0	0	59684	0	0	0	0	0	0	0	0	0	0	0	0	0	0	0	0	0	0	35987	0	403180	87262	354280	21658	0	60811	422430	105720	87201	107650	0	137890	160560	0	0	0	0	0	0	0	2916500	4749500	814210	776650
P21817	Ryanodine receptor 1	RYR1	0	0	0	0	0	0	0	0	0	0	0	0	0	0	0	771010	0	0	0	0	0	0	0	0	0	0	0	0	0	0	0	0	0	0	0	0	0	0	0	0	0	0	0	0	0	0	0
P21980	Protein-glutamine gamma-glutamyltransferase 2	TGM2	0	0	0	0	0	0	0	0	0	0	0	0	0	0	0	0	0	0	0	0	0	0	0	16592	44657	22492	0	0	0	0	0	0	0	0	0	0	0	0	0	0	0	0	0	0	0	132750	0
P22087	rRNA 2-O-methyltransferase fibrillarin	FBL	0	0	0	0	0	0	0	0	0	0	0	0	0	0	0	0	0	0	0	0	0	0	0	0	0	0	0	0	0	0	0	0	0	0	0	0	0	0	0	0	0	0	0	157520	0	0	0
P22105	Tenascin-X	TNXB	0	0	0	0	0	0	0	0	0	0	0	0	0	0	0	0	0	0	0	0	0	0	0	0	0	75884	0	0	0	0	0	0	0	0	0	0	0	0	0	0	0	0	0	487680	0	1080300	3871900
P22234	Bifunctional phosphoribosylaminoimidazole carboxylase/phosphoribosylaminoimidazole succinocarboxamide synthetase	PAICS	0	0	0	0	0	0	0	0	0	0	0	0	0	0	0	0	0	0	0	0	0	0	0	0	0	0	15394	0	141900	153730	0	0	0	0	0	0	48467	0	0	0	0	0	0	0	0	0	0
P22314	Ubiquitin-like modifier-activating enzyme 1	UBA1	0	0	0	0	0	0	0	0	0	0	0	0	0	0	0	0	0	0	0	0	0	0	0	0	0	0	0	0	22536	78097	0	0	0	0	0	0	0	0	0	0	0	0	0	294930	0	618730	784070
P22352	Glutathione peroxidase 3	GPX3	0	0	0	0	0	0	0	0	0	0	0	0	0	0	0	0	0	0	0	0	0	0	0	0	0	39975	0	0	63010	0	0	0	0	0	0	0	0	0	0	0	0	0	0	128780	0	0	0
P22626	Heterogeneous nuclear ribonucleoproteins A2/B1	HNRNPA2B1	0	0	0	0	0	0	0	0	0	0	0	0	0	0	0	0	0	0	0	0	0	0	0	0	0	0	0	10242	127560	149170	0	0	0	0	0	0	0	0	0	0	0	0	0	875630	278670	731670	0
P22676	Calretinin	CALB2	0	0	0	0	0	0	0	0	0	0	0	0	0	0	0	0	0	0	0	0	0	0	0	0	0	0	0	0	366020	0	0	0	0	0	0	0	0	0	0	0	0	0	0	0	0	0	0
P22695	Cytochrome b-c1 complex subunit 2, mitochondrial	UQCRC2	0	0	0	0	0	0	0	0	0	0	0	0	0	0	0	0	0	0	0	0	0	0	0	0	0	0	0	0	0	51286	0	0	0	0	0	0	0	0	0	0	0	0	0	56412	73375	0	0
P22735	Protein-glutamine gamma-glutamyltransferase K	TGM1	0	0	0	0	0	195090	248030	309290	0	1320200	456560	169570	727510	1159600	0	219330	563980	1361900	935400	324810	212230	63667	305160	74901	93868	220930	1057800	1441500	3433700	2049700	604590	102060	449490	479900	135610	387280	1158500	26657	398280	326190	77964	233470	126900	0	0	0	0
P23141	Liver carboxylesterase 1	CES1	0	0	0	0	0	0	0	0	0	0	0	0	0	0	0	0	0	0	0	0	0	0	0	0	0	0	0	0	179970	0	395790	0	0	0	0	0	0	0	0	0	0	0	0	0	0	0	428410
P23246	Splicing factor, proline- and glutamine-rich	SFPQ	0	0	0	0	0	0	0	0	0	0	0	0	0	0	0	0	0	0	0	0	0	0	0	0	0	0	0	0	0	0	0	0	0	0	0	0	0	0	0	0	0	0	0	29316	0	92232	0
P23280	Carbonic anhydrase 6	CA6	0	0	0	0	0	0	0	0	0	0	0	0	0	0	0	74314	0	0	0	0	0	0	0	0	0	0	0	32314	12251	0	0	0	0	0	0	0	0	0	0	0	0	0	0	0	0	0	0
P23284	Peptidyl-prolyl cis-trans isomerase B	PPIB	0	0	0	0	0	0	0	0	0	0	0	0	0	0	0	0	0	0	0	0	0	0	0	0	0	0	0	0	0	0	0	0	0	0	0	0	0	0	0	0	0	0	0	878510	644840	104020	35954
P23381	Tryptophan--tRNA ligase, cytoplasmic	WARS1	0	0	0	0	0	0	0	0	0	0	0	0	0	0	0	0	0	0	0	0	0	0	0	0	0	0	0	0	0	0	0	0	0	0	0	0	0	0	0	0	0	0	0	135770	18353	34027	78942
P23396	Small ribosomal subunit protein uS3	RPS3	0	0	0	0	0	0	0	0	0	0	0	0	0	0	0	0	0	0	0	0	0	0	0	65576	0	53827	0	69048	151230	314230	50653	0	0	29580	0	0	0	0	0	0	0	0	0	0	0	405180	0
P23526	Adenosylhomocysteinase	AHCY	0	0	0	0	0	0	0	18869	0	0	0	0	0	0	0	0	0	0	0	0	0	23319	0	0	0	0	27487	0	0	243000	0	0	0	0	0	0	34408	0	0	0	0	0	0	0	0	38613	75567
P23528	Cofilin-1	CFL1	0	0	0	0	0	0	0	0	0	0	118140	0	273220	0	0	179940	0	0	0	0	0	0	0	0	0	0	0	0	1446100	518210	0	0	0	0	0	0	18183	0	0	0	0	0	0	411070	242740	576820	387970
P23946	Chymase	CMA1	0	0	0	0	0	0	0	0	0	0	0	0	0	0	0	0	0	0	0	0	0	0	0	72822	0	0	0	0	0	0	0	0	0	0	0	0	0	0	0	0	0	0	0	98267	0	0	615730
P24158	Myeloblastin	PRTN3	0	0	0	0	0	0	0	0	0	0	0	0	161590	0	0	71830	0	0	0	0	0	0	0	0	0	0	0	0	0	0	0	0	0	0	0	0	0	0	0	0	0	0	0	0	0	0	0
P24539	ATP synthase F(0) complex subunit B1, mitochondrial	ATP5PB	0	0	0	0	0	0	0	0	0	0	0	0	0	0	0	0	0	0	0	0	0	0	0	0	0	0	0	0	0	0	0	0	0	0	0	0	0	0	0	0	0	0	0	0	0	98035	83404
P24752	Acetyl-CoA acetyltransferase, mitochondrial	ACAT1	0	0	0	0	0	0	0	0	0	0	0	0	0	0	0	0	0	0	0	0	0	12290	0	0	0	18992	0	0	0	0	0	0	0	0	20906	0	0	0	0	0	0	0	0	116340	93286	0	0
P24821	Tenascin	TNC	0	0	0	0	0	0	0	0	0	0	0	0	0	0	0	0	0	0	0	0	0	0	0	0	0	80408	0	0	0	0	0	0	0	0	509900	0	0	0	0	0	0	0	0	0	0	0	0
P25311	Zinc-alpha-2-glycoprotein	AZGP1	0	26403	39149	0	0	564720	2249800	851170	59142	1630600	451090	488030	1295300	1111700	0	336720	869100	72826000	1199200	372510	314160	365290	510640	43013	73510	272740	1403400	447320	2770100	2132900	836600	143520	1609200	314540	260540	201400	908550	336180	210760	794370	65663	353340	252630	175790	0	1272900	0
P25705	ATP synthase subunit alpha, mitochondrial	ATP5F1A	0	0	0	0	0	0	0	0	15150	0	0	0	0	0	0	459840	0	0	0	0	0	0	22111	0	0	23400	0	20042	85772	314460	0	94130	0	0	29288	349040	0	0	0	0	0	0	0	329920	265400	769720	1086200
P25786	Proteasome subunit alpha type-1	PSMA1	0	0	0	0	0	0	0	0	0	0	25250	0	0	0	0	0	0	61052	0	0	0	0	0	0	0	0	53243	20592	1167500	0	27234	0	0	0	0	0	27113	0	0	0	0	0	0	0	0	0	0
P25787	Proteasome subunit alpha type-2	PSMA2	0	0	0	0	0	0	0	0	0	0	0	0	0	0	0	0	0	35021	0	0	0	0	0	0	0	0	0	0	662120	26678	0	0	0	0	0	0	0	0	0	0	0	0	0	0	0	0	46317
P25788	Proteasome subunit alpha type-3	PSMA3	0	0	0	0	0	0	51046	0	0	122520	0	0	48999	116960	0	0	48164	90404	100640	0	0	0	0	0	0	0	0	0	627560	0	0	0	0	0	0	0	66480	0	45768	0	0	0	0	0	0	0	0
P25789	Proteasome subunit alpha type-4	PSMA4	0	0	0	0	0	0	14903	11357	0	0	50517	0	0	156670	0	0	0	56995	0	0	0	0	0	0	0	0	68167	168460	771380	106770	17625	0	0	0	0	0	43416	0	0	0	0	0	0	0	0	0	0
P25815	Protein S100-P	S100P	0	0	0	0	0	0	0	0	0	0	0	12392	78711	47315	0	52097	0	32401	0	0	0	0	0	0	0	0	0	0	12462000	202600	165090	0	0	0	0	0	0	0	0	0	0	0	0	0	0	0	0
P26038	Moesin	MSN	0	0	0	0	0	0	0	0	0	0	0	0	0	0	0	0	0	0	0	0	0	0	0	0	21396	0	109630	55372	235160	0	0	0	0	0	60824	0	0	0	0	0	0	0	0	454460	138010	1558600	722590
P26373	Large ribosomal subunit protein eL13	RPL13	0	0	0	0	0	0	0	0	0	0	0	0	0	0	0	0	0	0	0	0	0	0	0	0	146440	0	0	0	0	83790	0	0	0	0	0	0	0	0	0	0	0	0	0	83222	0	63999	0
P26583	High mobility group protein B2	HMGB2	0	0	0	0	0	0	0	0	0	0	0	0	0	0	0	0	0	0	0	0	0	0	0	0	0	0	0	0	0	0	0	0	0	0	0	0	0	0	0	0	0	0	0	32357	0	45253	204170
P26599	Polypyrimidine tract-binding protein 1	PTBP1	0	0	0	0	0	0	0	0	0	0	0	0	0	0	0	0	0	0	0	0	0	0	0	0	0	0	0	0	0	172770	0	0	0	0	0	0	0	0	0	0	0	0	0	0	0	164140	0
P26640	Valine--tRNA ligase	VARS1	0	0	0	0	0	0	0	0	0	0	0	0	0	0	0	0	0	0	0	0	0	0	0	0	0	0	0	0	0	0	0	0	0	0	0	0	0	0	0	0	0	0	0	0	0	37998	0
P26641	Elongation factor 1-gamma	EEF1G	0	0	0	0	0	0	0	0	0	0	0	0	0	0	0	0	0	0	0	0	0	0	0	0	0	0	0	10591	110680	586710	0	0	0	0	0	0	0	0	0	0	0	0	0	67585	0	365390	0
P27105	Stomatin	STOM	0	0	0	0	0	0	0	0	0	0	0	0	0	0	0	0	0	0	0	0	0	0	0	22516	92039	13706	0	0	0	0	21584	0	0	0	0	0	0	0	0	0	0	0	0	68700	0	282990	329120
P27144	Adenylate kinase 4, mitochondrial	AK4	0	0	0	0	0	0	0	0	0	0	0	0	0	0	0	0	0	0	0	0	0	0	0	0	0	0	0	0	0	0	0	0	0	0	0	0	0	0	0	0	0	0	0	0	0	0	0
P27338	Amine oxidase [flavin-containing] B	MAOB	0	0	0	0	0	0	0	0	0	0	0	0	0	0	0	0	0	0	0	0	0	0	0	0	0	0	0	0	0	0	0	0	0	0	0	0	0	0	0	0	0	0	0	0	0	52108	150210
P27348	14-3-3 protein theta	YWHAQ	0	0	0	0	0	0	0	0	0	0	0	0	0	0	0	0	0	0	0	0	0	0	0	0	0	0	0	0	822050	304730	0	0	0	0	0	0	0	0	0	0	0	0	0	54011	0	0	0
P28482	Mitogen-activated protein kinase 1	MAPK1	0	0	0	0	0	0	0	0	0	0	0	0	0	0	0	0	0	0	0	0	0	0	0	0	0	0	0	0	0	5860.6	0	0	0	0	0	0	0	0	0	0	0	0	0	0	0	0	0
P27449	V-type proton ATPase 16 kDa proteolipid subunit c	ATP6V0C	24141	0	0	0	0	1193100	0	719210	0	1401400	1771000	338470	1435300	759270	0	836600	921970	1629600	1235900	93215	759740	1922100	1352700	909320	0	530920	2397300	0	742690	0	873630	6812900	0	2450000	942840	2411400	1124100	430640	565130	762540	841540	558080	809960	0	0	0	0
P27482	Calmodulin-like protein 3	CALML3	0	0	0	0	0	0	0	366460	0	34465	170510	0	260140	403980	0	22762	0	0	0	83110	15019	0	25949	0	30212	0	26523	303260	10565000	7206300	0	0	41774	33869	0	0	24678	0	0	0	0	0	0	0	0	0	0
P27487	Dipeptidyl peptidase 4	DPP4	0	0	0	0	0	0	0	0	0	0	0	0	0	0	0	0	0	0	0	0	0	0	0	0	0	0	0	0	0	0	0	0	0	0	0	0	0	0	0	0	0	0	0	74761	0	0	100990
P27695	DNA repair nuclease/redox regulator APEX1	APEX1	0	0	0	0	0	0	0	0	0	0	0	0	0	0	0	0	0	0	0	0	0	0	0	0	0	0	0	0	0	0	0	0	0	0	0	0	0	0	0	0	0	0	0	0	0	54674	0
P27797	Calreticulin	CALR	0	0	0	0	0	0	0	0	0	0	0	0	0	0	0	0	0	0	0	0	0	0	0	0	0	0	0	0	0	17977	0	0	0	0	0	0	0	0	0	0	0	0	0	32677	0	970100	21620
P27824	Calnexin	CANX	0	0	0	0	0	0	0	0	0	0	0	0	0	0	0	0	0	0	0	0	0	0	0	0	0	0	0	0	157250	119740	0	0	0	0	0	0	0	0	0	0	0	0	0	0	0	453410	111230
P28062	Proteasome subunit beta type-8	PSMB8	0	0	0	0	0	0	0	0	0	0	0	0	0	0	0	0	0	0	0	0	0	0	0	0	0	0	0	0	40772	39713	0	0	0	0	0	0	0	0	0	0	0	0	0	0	0	0	0
P28066	Proteasome subunit alpha type-5	PSMA5	0	0	0	0	0	17813	15563	27502	0	71436	0	0	35586	112190	0	0	0	141540	110710	0	0	42349	0	0	0	0	318600	91202	1655500	431300	0	0	0	0	0	0	0	0	0	0	0	0	0	0	0	0	0
P28070	Proteasome subunit beta type-4	PSMB4	0	0	0	0	0	0	0	0	0	0	32073	0	19772	60794	0	0	0	51420	47629	0	0	0	0	0	0	27319	88760	98976	1036500	244840	72005	0	0	0	0	0	30093	0	0	0	0	0	0	0	0	50559	0
P28072	Proteasome subunit beta type-6	PSMB6	0	0	0	0	0	60520	0	76260	0	35568	0	0	0	132640	0	0	0	109120	102940	0	0	0	0	0	0	0	196080	0	368250	86188	47884	0	0	0	0	0	30844	0	58497	34016	0	0	0	0	0	0	0
P28074	Proteasome subunit beta type-5	PSMB5	0	0	0	0	0	19436	30962	17459	0	142680	0	0	27295	72394	0	0	0	103840	46397	0	0	0	0	0	0	0	98434	28238	1754900	285510	45047	0	0	0	0	0	127510	0	0	0	0	0	0	0	0	0	0
P28838	Cytosol aminopeptidase	LAP3	0	0	0	0	0	0	0	0	0	0	0	0	0	0	0	0	0	0	0	0	0	0	0	0	0	0	0	0	0	0	0	0	0	0	0	0	0	0	0	0	0	0	0	48614	0	608140	0
P28906	Hematopoietic progenitor cell antigen CD34	CD34	0	0	0	0	0	0	0	0	0	0	0	0	0	0	0	0	0	0	0	0	0	0	0	0	0	0	0	0	0	0	0	0	0	0	0	0	0	0	0	0	0	0	0	138560	21816	0	0
P29033	Gap junction beta-2 protein	GJB2	0	0	0	0	0	0	0	0	0	0	0	0	0	0	0	0	0	0	0	0	0	0	0	0	0	0	0	0	104570	0	0	0	0	0	0	0	0	0	0	0	0	0	0	0	0	0	0
P29034	Protein S100-A2	S100A2	0	0	0	0	0	0	0	0	0	0	0	0	0	0	0	0	0	0	0	0	0	0	0	0	0	0	0	0	797240	0	0	0	0	0	0	0	0	0	0	0	0	0	0	0	0	0	0
P29373	Cellular retinoic acid-binding protein 2	CRABP2	0	0	0	0	0	0	0	0	0	0	0	0	0	0	0	0	0	0	0	0	0	0	0	0	0	0	0	0	1186400	304430	0	0	0	0	0	0	0	0	0	0	0	0	0	0	0	0	0
P29401	Transketolase	TKT	0	0	0	0	0	0	0	0	0	26616	21203	0	191660	0	0	0	0	0	24156	0	0	0	0	0	0	0	0	0	116280	225270	0	0	0	24461	0	0	0	0	0	0	0	0	0	538520	46964	758010	2427000
P29508	Serpin B3	SERPINB3	0	0	13811	0	0	254040	1280900	6470100	21859	1816500	1065000	526270	2550600	3171700	101470	1012500	588850	1345300	1637200	263150	531760	271060	901400	363270	76889	636690	248260	2256800	41092000	43581000	8636600	374600	750540	194370	319940	566410	2147200	188670	686830	756450	149000	304490	326250	0	0	0	0
P29692	Elongation factor 1-delta	EEF1D	0	0	0	0	0	0	0	0	0	0	0	0	0	0	0	0	0	0	0	0	0	0	0	0	0	0	0	0	52534	0	0	0	0	0	0	0	0	0	0	0	0	0	0	0	0	77379	60997
P29972	Aquaporin-1	AQP1	0	0	0	0	0	0	0	0	0	0	0	0	0	0	0	0	0	0	0	0	0	0	0	0	0	0	0	0	0	0	0	0	0	0	0	0	0	0	0	0	0	0	0	122830	0	0	0
P30043	Flavin reductase (NADPH)	BLVRB	0	0	0	0	0	0	0	0	0	0	0	0	0	0	0	0	0	0	0	0	0	0	0	0	0	0	0	0	0	0	0	0	0	0	0	0	0	0	0	0	0	0	0	186270	0	228100	243120
P30044	Peroxiredoxin-5, mitochondrial	PRDX5	0	0	0	0	0	0	0	0	0	0	0	0	0	0	0	0	0	0	0	0	0	0	0	0	0	0	0	0	0	0	0	0	0	0	0	0	0	0	0	0	0	0	0	0	0	416360	0
P30048	Thioredoxin-dependent peroxide reductase, mitochondrial	PRDX3	0	0	0	0	0	0	0	0	0	0	0	0	0	0	0	0	0	0	0	0	0	0	0	0	0	0	0	0	24194	0	0	0	0	0	0	0	0	0	0	0	0	0	0	0	0	0	48578
P30084	Enoyl-CoA hydratase, mitochondrial	ECHS1	0	0	0	0	0	0	0	0	0	0	0	0	0	0	0	0	0	0	0	0	0	0	0	0	0	0	0	0	0	0	0	0	0	0	0	0	0	0	0	0	0	0	0	139040	273860	0	0
P30085	UMP-CMP kinase	CMPK1	0	0	0	0	0	0	0	0	0	0	0	0	0	0	0	0	0	0	0	0	0	0	0	0	0	0	0	0	89458	0	0	0	0	0	0	0	0	0	0	0	0	0	0	0	0	0	0
P30086	Phosphatidylethanolamine-binding protein 1	PEBP1	0	0	0	0	0	0	0	21370	0	30529	44243	0	0	58519	0	646760	0	0	0	0	0	0	0	0	0	0	31597	0	0	981210	0	0	11934	0	0	0	36104	0	0	0	0	0	0	245900	22831	0	30221
P30101	Protein disulfide-isomerase A3	PDIA3	0	0	0	0	0	0	0	0	0	0	0	0	0	0	0	0	0	0	0	0	0	0	0	53417	0	70474	22997	0	54636	378340	97892	0	0	0	39016	93213	0	0	0	0	0	0	0	563610	239270	1026600	141930
P30740	Leukocyte elastase inhibitor	SERPINB1	0	0	0	0	0	0	11649	0	0	0	211970	0	121450	0	0	0	0	0	0	0	0	0	0	0	0	0	0	0	213960	76698	13887	0	0	0	0	0	0	0	0	0	0	0	0	102820	0	211290	0
P30837	Aldehyde dehydrogenase X, mitochondrial	ALDH1B1	0	0	0	0	0	0	0	0	0	0	0	0	0	0	0	0	0	0	0	0	0	0	0	0	0	0	0	0	0	0	0	0	0	0	0	0	0	0	0	0	0	0	0	76098	26394	0	0
P30838	Aldehyde dehydrogenase, dimeric NADP-preferring	ALDH3A1	0	0	0	0	0	0	0	0	0	0	0	0	113410	0	0	0	0	0	0	0	0	0	0	0	0	0	0	0	0	26216	0	0	0	0	0	0	0	0	0	0	0	0	0	0	0	0	0
P31025	Lipocalin-1	LCN1	0	0	41037	0	0	62222	235160	44079	3889300	128680	283300	297600	249780	216580	0	113030	239430	356140	211050	547900	0	0	0	0	76528	0	33485	531930	0	0	1695800	0	0	0	0	0	191070	206480	0	100740	32155	502740	206440	0	0	0	0
P31040	Succinate dehydrogenase [ubiquinone] flavoprotein subunit, mitochondrial	SDHA	0	0	0	0	0	0	0	0	0	0	0	0	0	0	0	57132	0	0	0	0	0	0	0	0	0	0	0	0	0	0	0	0	0	0	0	0	0	0	0	0	0	0	0	0	0	0	49552
P31151	Protein S100-A7	S100A7	0	0	0	0	0	567830	1014000	2689200	0	2175200	1343200	648740	1601900	1828900	0	1108900	112430	605220	1398400	919190	1267300	658680	916170	390950	334530	2334900	1874500	3573700	242000000	82495000	9336800	887410	966490	368980	199560	1172900	2101600	445710	352740	578060	81082	391720	568890	0	0	0	0
P31323	cAMP-dependent protein kinase type II-beta regulatory subunit	PRKAR2B	0	0	0	0	0	0	0	0	0	0	0	0	0	0	0	0	0	0	0	0	0	0	0	0	0	0	0	0	0	0	0	0	0	0	0	0	0	0	0	0	0	0	0	0	0	0	169580
P31415	Calsequestrin-1	CASQ1	0	0	0	0	0	0	0	0	0	0	0	0	0	0	0	1843200	0	0	0	0	38262	0	0	0	0	0	0	0	0	0	0	0	0	0	88656	0	0	0	0	0	0	0	0	0	0	0	0
P31937	3-hydroxyisobutyrate dehydrogenase, mitochondrial	HIBADH	0	0	0	0	0	0	0	0	0	0	0	0	0	0	0	0	0	0	0	0	0	0	0	0	0	0	0	0	0	0	0	0	0	0	0	0	0	0	0	0	0	0	0	114160	42636	0	28510
P31943	Heterogeneous nuclear ribonucleoprotein H	HNRNPH1	0	0	0	0	0	0	0	0	0	0	0	0	0	0	0	0	0	0	0	0	0	0	0	0	0	0	0	0	258780	378190	0	0	0	0	0	0	0	0	0	0	0	0	0	45590	0	167700	212020
P31944	Caspase-14	CASP14	0	79210	0	23307	0	3934900	3395400	2237300	92286	4210500	2378300	1539100	2730400	2669900	93850	1152300	1984600	4342500	3119500	955060	1220900	1825600	2029900	1032600	745520	1591800	12362000	4546700	13558000	8961000	14065000	2428700	2261500	2419000	384780	2742100	4563500	730220	2419600	1829600	218070	890860	626220	0	0	0	0
P31946	14-3-3 protein beta/alpha	YWHAB	0	0	0	0	0	0	0	0	0	0	0	0	0	0	0	0	0	0	0	0	0	0	0	0	0	0	0	0	0	423250	0	0	0	0	0	0	0	0	0	0	0	0	0	181020	22116	142540	96574
P31947	14-3-3 protein sigma	SFN	0	0	0	0	0	0	39990	109370	0	0	937410	51397	332980	0	0	0	0	0	0	0	0	0	0	0	0	0	0	245280	1749400	4683000	0	0	0	0	0	0	0	0	17412	0	0	22778	0	44817	0	0	0
P31949	Protein S100-A11	S100A11	0	0	0	0	0	13016	0	68526	0	0	138220	0	114430	0	0	0	0	0	44522	34885	0	0	0	0	0	0	0	0	1152300	249100	19758	0	0	0	0	0	10907	11150	46837	32765	0	28505	0	0	0	0	0
P32119	Peroxiredoxin-2	PRDX2	0	0	0	0	0	56103	153140	36981	0	184220	108570	50650	95433	215280	0	330670	0	219200	21642	67567	0	119890	8237.9	51385	0	195730	351510	400400	503300	536350	202100	0	173680	114110	24791	85596	104730	0	59881	54024	0	0	52993	939460	514140	578500	656410
P32455	Guanylate-binding protein 1	GBP1	0	0	0	0	0	0	0	0	0	0	0	0	0	0	0	0	0	0	0	0	0	0	0	0	0	0	0	0	0	0	0	0	0	0	0	0	0	0	0	0	0	0	0	0	0	96663	0
P32969	Large ribosomal subunit protein uL6	RPL9	0	0	0	0	0	0	0	0	0	0	0	0	0	0	0	0	0	0	0	0	0	0	0	0	0	0	0	0	0	68093	0	0	0	0	0	0	0	0	0	0	0	0	0	61256	0	0	0
P33121	Long-chain-fatty-acid--CoA ligase 1	ACSL1	0	0	0	0	0	0	0	0	0	0	0	0	0	0	0	0	0	0	0	0	0	0	0	0	0	0	31193	0	176100	0	159530	0	0	0	39377	61003	0	0	0	0	0	0	0	154290	75966	0	311460
P34932	Heat shock 70 kDa protein 4	HSPA4	0	0	0	0	0	0	0	0	0	0	0	0	0	0	0	0	0	0	0	0	0	0	0	0	0	0	0	0	0	0	0	0	0	0	0	0	0	0	0	0	0	0	0	52059	0	76400	0
P35030	Trypsin-3	PRSS3	98039	254360	39528	207120	113890	513460	0	304250	210790	833580	271370	97739	160320	62349	799960	135110	148840	101970	103460	133520	50984	167310	762720	69773	154670	62114	206820	156180	150980	226750	140120	239770	100190	145920	86000	163020	67965	89334	114770	157390	138810	119350	141460	19493	77399	0	0
P35221	Catenin alpha-1	CTNNA1	0	0	0	0	0	0	0	0	0	0	0	0	0	0	0	0	0	0	0	0	0	0	0	0	0	0	0	0	0	0	0	0	0	0	0	0	0	0	0	0	0	0	0	0	0	93730	0
P35232	Prohibitin 1	PHB1	0	0	0	0	0	0	0	0	0	0	0	0	0	0	0	0	0	0	0	0	0	0	0	0	0	0	0	0	0	0	0	0	0	0	0	0	0	0	0	0	0	0	0	0	0	333380	141190
P35237	Serpin B6	SERPINB6	0	0	0	0	0	0	0	0	0	0	0	0	0	36106	0	0	0	0	0	0	0	0	0	0	0	0	0	0	132150	0	0	0	0	0	0	0	0	0	0	0	0	0	0	81978	0	0	112560
P35241	Radixin	RDX	0	0	0	0	0	0	0	0	0	0	0	0	0	0	0	0	0	0	0	0	0	0	0	0	0	0	0	0	0	0	0	0	0	0	0	0	0	0	0	0	0	0	0	0	0	74153	0
P35268	Large ribosomal subunit protein eL22	RPL22	0	0	0	0	0	0	0	0	0	0	0	0	0	0	0	0	0	0	0	0	0	0	0	37331	0	0	0	0	636670	846070	49329	0	0	0	0	0	0	0	0	0	0	0	0	180570	25527	0	0
P35270	Sepiapterin reductase	SPR	0	0	0	0	0	0	0	0	0	0	0	0	0	0	0	14392	0	0	0	0	0	0	0	0	0	0	0	0	0	0	0	0	0	0	0	0	0	0	0	0	0	0	0	0	0	0	0
P35555	Fibrillin-1;Asprosin	FBN1	944350	91938	2413400	0	155770	0	0	0	356910	0	0	0	0	0	0	0	0	0	0	0	191180	0	0	2239400	398150	3006700	230340	0	1205200	303860	1702400	1514000	489290	707760	134820	0	225020	0	36062	0	0	0	0	309630	0	0	0
P35573	Glycogen debranching enzyme;4-alpha-glucanotransferase;Amylo-alpha-1,6-glucosidase	AGL	0	0	0	0	0	0	0	0	0	0	0	0	0	0	0	1491200	0	0	0	0	0	0	0	0	0	0	0	0	0	0	0	0	0	0	0	0	0	0	0	0	0	0	0	0	0	0	0
P35579	Myosin-9	MYH9	0	0	0	0	0	0	51297	207360	0	200510	216520	0	480710	175320	0	0	0	42157	45478	0	55584	41937	31797	109430	54793	88628	110150	145110	45366000	5161700	50528	145620	91978	113410	13328	113000	199240	0	58778	0	0	0	0	1282100	738320	9697700	3450600
P35580	Myosin-10	MYH10	0	0	0	0	0	0	0	0	0	0	0	0	0	0	0	0	0	0	0	0	0	0	0	0	0	0	0	0	339420	0	0	0	0	0	0	0	0	0	0	0	0	0	0	135560	89728	1051900	889060
P35606	Coatomer subunit beta	COPB2	0	0	0	0	0	0	0	0	0	0	0	0	0	0	0	0	0	0	0	0	0	0	0	0	0	0	51762	0	488400	313910	0	0	0	0	0	0	0	0	0	0	0	0	0	0	0	429550	0
P35609	Alpha-actinin-2	ACTN2	0	0	0	0	0	0	0	0	0	0	0	0	0	0	0	3897400	0	0	0	0	1618500	918990	0	539520	0	1145100	0	0	802860	166010	0	0	0	0	1637400	0	0	0	0	0	0	0	0	0	0	67606	0
P35611	Alpha-adducin	ADD1	0	0	0	0	0	0	0	0	0	0	0	0	0	0	0	0	0	0	0	0	0	0	0	0	0	0	0	0	0	0	0	0	0	0	0	0	0	0	0	0	0	0	0	13778	0	25557	0
P35625	Metalloproteinase inhibitor 3	TIMP3	0	0	0	0	0	0	0	0	0	0	0	0	0	0	0	0	0	0	0	0	0	0	0	0	0	1953800	0	0	0	0	0	0	0	128230	0	0	35507	0	0	0	0	0	0	0	0	0	1174700
P35637	RNA-binding protein FUS	FUS	0	0	0	0	0	0	0	0	0	0	0	0	0	0	0	0	0	0	0	0	0	0	0	0	0	0	0	0	0	0	0	0	0	0	0	0	0	0	0	0	0	0	0	130360	0	274040	0
P35638	DNA damage-inducible transcript 3 protein	DDIT3	0	0	0	0	0	0	0	0	0	0	0	0	0	0	0	0	0	0	0	0	360300	287000	0	462000	0	0	0	0	0	0	0	0	0	0	0	0	0	0	0	0	0	0	0	0	0	0	0
P35749	Myosin-11	MYH11	0	0	0	0	0	0	0	0	0	0	0	0	0	0	0	0	0	0	0	0	0	0	0	0	0	0	0	0	0	0	0	0	0	0	0	0	0	0	0	0	0	0	0	0	0	134280	330090
P35754	Glutaredoxin-1	GLRX	0	0	0	0	0	0	0	0	0	0	0	0	0	29113	0	0	0	0	0	0	0	0	0	0	0	0	109590	19805	273240	0	0	0	0	0	0	0	0	0	0	0	0	0	0	0	0	0	0
P36578	Large ribosomal subunit protein uL4	RPL4	0	0	0	0	0	0	0	0	0	0	0	0	0	0	0	0	0	0	0	0	0	0	0	0	29257	0	0	0	55621	36482	0	41923	0	0	0	0	0	0	0	0	0	0	0	116470	0	0	0
P36871	Phosphoglucomutase-1	PGM1	0	0	0	0	0	0	0	0	0	0	0	0	0	0	0	5693600	0	0	0	0	0	0	0	0	0	0	0	0	0	0	0	0	0	0	0	0	0	0	0	0	0	0	0	37492	0	0	0
P36952	Serpin B5	SERPINB5	0	0	0	0	0	0	0	12649	0	0	0	0	0	110620	0	0	0	0	0	0	0	0	0	0	10144	0	0	22390	332810	1576200	0	0	0	0	0	0	0	0	0	0	0	0	0	0	0	0	0
P36955	Pigment epithelium-derived factor	SERPINF1	0	0	0	0	0	0	0	0	0	0	0	0	0	0	0	0	0	0	0	0	0	0	0	0	0	0	0	0	0	0	0	0	0	0	0	0	0	0	0	0	0	0	0	58473	192590	28873	56633
P36957	Dihydrolipoyllysine-residue succinyltransferase component of 2-oxoglutarate dehydrogenase complex, mitochondrial	DLST	0	0	0	0	0	0	0	0	0	0	0	0	0	0	0	0	0	0	0	0	0	0	0	0	0	0	0	0	25345	0	0	0	0	0	0	0	0	0	0	0	0	0	0	102730	29310	0	0
P37802	Transgelin-2	TAGLN2	0	0	0	0	0	0	0	0	0	0	0	0	0	0	0	0	0	0	0	0	0	0	0	0	0	0	0	0	350200	50297	0	0	0	0	0	0	0	0	0	0	0	0	0	0	0	53516	100250
P37837	Transaldolase	TALDO1	0	0	0	0	0	0	16928	0	0	0	0	0	0	52391	0	0	0	0	0	0	0	0	0	0	0	0	75417	0	248390	90611	0	0	0	0	0	0	0	0	0	0	0	0	0	255210	70528	0	0
P37840	Alpha-synuclein	SNCA	0	0	0	0	0	0	0	0	0	0	0	0	0	0	0	0	0	0	0	0	0	0	0	0	0	0	0	0	0	0	0	0	0	0	0	0	0	0	0	0	0	0	0	0	0	78116	0
P38606	V-type proton ATPase catalytic subunit A	ATP6V1A	0	0	0	0	0	0	0	0	0	0	0	0	0	0	0	0	0	0	0	0	0	0	0	0	0	0	0	0	188180	212190	0	0	0	0	0	0	0	0	0	0	0	0	0	0	0	76866	0
P38646	Stress-70 protein, mitochondrial	HSPA9	0	0	0	0	0	0	0	0	0	0	0	0	0	0	0	0	0	0	0	0	0	0	0	0	0	0	0	0	0	45674	0	67129	0	0	0	0	0	0	0	0	0	0	0	146280	124810	257140	83624
P38919	Eukaryotic initiation factor 4A-III	EIF4A3	0	0	660690	0	0	0	0	0	0	0	0	0	0	0	0	0	0	0	0	0	0	0	0	0	0	0	0	0	0	0	0	0	0	0	0	0	0	0	0	0	0	0	0	0	12392	0	0
P39023	Large ribosomal subunit protein uL3	RPL3	0	0	0	0	0	0	0	0	0	0	0	0	0	0	0	0	0	0	0	0	0	0	0	0	0	0	0	0	0	0	0	0	0	0	0	0	0	0	0	0	0	0	0	32829	0	326420	69725
P39059	Collagen alpha-1(XV) chain	COL15A1	0	0	0	0	0	0	0	0	0	0	0	0	0	0	0	0	0	0	0	0	0	0	0	0	0	0	30488	0	0	0	0	0	0	0	75613	34954	0	0	0	0	0	0	0	35413	0	0	0
P39060	Collagen alpha-1(XVIII) chain	COL18A1	0	0	0	0	0	0	0	0	0	0	0	0	0	0	0	0	0	0	0	0	0	0	0	0	0	42487	0	0	0	0	232720	0	0	0	0	0	0	0	0	0	0	0	0	0	0	70931	180890
P39656	Dolichyl-diphosphooligosaccharide--protein glycosyltransferase 48 kDa subunit	DDOST	0	0	0	0	0	0	0	0	0	0	0	0	0	0	0	0	0	0	0	0	0	0	0	0	0	0	0	0	57081	278550	0	0	0	0	0	0	0	0	0	0	0	0	0	0	0	0	0
P40121	Macrophage-capping protein	CAPG	0	0	0	0	0	0	0	0	0	0	0	0	0	0	0	0	0	0	0	0	0	0	0	0	0	0	0	0	0	22249	0	0	0	0	0	0	0	0	0	0	0	0	0	75474	0	143770	106440
P40227	T-complex protein 1 subunit zeta	CCT6A	0	0	0	0	0	0	0	0	0	0	0	0	0	0	0	0	0	0	0	0	0	0	0	0	0	0	0	0	0	46390	0	0	0	0	0	0	0	0	0	0	0	0	0	60789	0	0	0
P40429	Large ribosomal subunit protein uL13	RPL13A	0	0	0	0	0	0	0	0	0	0	0	0	0	0	0	0	0	0	0	0	0	0	0	0	0	0	0	0	0	0	0	0	0	0	0	0	0	0	0	0	0	0	0	89603	0	0	0
P40616	ADP-ribosylation factor-like protein 1	ARL1	0	0	0	0	0	0	0	0	0	0	0	0	0	0	0	0	0	0	0	0	0	0	0	0	0	0	0	0	0	35370	0	0	0	0	0	0	0	0	0	0	0	0	0	0	0	0	0
P40925	Malate dehydrogenase, cytoplasmic	MDH1	0	0	0	0	0	0	0	0	0	0	0	0	0	0	0	93556	0	0	0	0	75920	0	0	0	0	0	0	0	0	235930	51790	0	0	0	67557	0	0	0	0	0	0	0	0	548820	151550	0	53122
P40926	Malate dehydrogenase, mitochondrial	MDH2	0	0	0	0	0	0	0	0	0	0	0	0	0	0	0	142150	0	0	0	0	0	0	0	0	0	0	0	0	65131	360890	0	0	0	0	30308	0	0	0	0	0	0	0	0	53882	28621	173250	0
P40939	Trifunctional enzyme subunit alpha, mitochondrial	HADHA	0	0	0	0	0	0	0	0	0	0	0	0	0	0	0	0	0	0	0	0	0	0	0	0	0	0	0	0	33446	0	0	0	0	0	0	0	0	0	0	0	0	0	0	195120	394790	414910	699430
P41091	Eukaryotic translation initiation factor 2 subunit 3	EIF2S3	0	0	0	0	0	0	0	0	0	0	0	0	0	0	0	0	0	0	0	0	0	0	0	0	0	0	0	0	0	0	0	0	0	0	0	0	0	0	0	0	0	0	0	0	0	0	0
P41218	Myeloid cell nuclear differentiation antigen	MNDA	0	0	0	0	0	0	0	0	0	0	0	0	0	0	0	0	0	0	0	0	0	0	0	0	0	0	0	0	0	0	0	0	0	0	0	0	0	0	0	0	0	0	0	0	0	84541	0
P42357	Histidine ammonia-lyase	HAL	0	0	25184	0	0	10852	0	7390.8	24830	36493	26266	0	37243	59824	0	0	0	130570	129860	0	0	0	56975	0	53457	0	132560	0	277310	2242800	28613	70683	0	0	0	0	203050	0	12304	0	0	0	0	0	0	0	0
P42566	Epidermal growth factor receptor substrate 15	EPS15	0	0	0	0	0	0	0	0	0	0	0	0	0	0	0	0	0	0	0	0	0	0	0	0	0	0	0	0	0	0	0	0	0	0	0	0	0	0	0	0	0	0	0	0	0	28190	0
P42704	Leucine-rich PPR motif-containing protein, mitochondrial	LRPPRC	0	0	0	0	0	0	0	0	0	0	0	0	0	0	0	0	0	0	0	0	0	0	0	0	0	0	0	0	0	0	0	0	0	0	0	0	0	0	0	0	0	0	0	0	0	0	0
P42765	3-ketoacyl-CoA thiolase, mitochondrial	ACAA2	0	0	0	0	0	0	0	0	0	0	0	0	0	0	0	0	0	0	0	0	0	0	0	0	0	0	0	0	0	0	0	0	0	0	0	0	0	0	0	0	0	0	0	261570	102170	192970	378560
P42766	Large ribosomal subunit protein uL29	RPL35	0	0	0	0	0	0	0	0	0	0	0	0	0	0	0	0	0	0	0	0	0	0	0	0	0	53527	0	0	0	0	0	0	0	0	0	0	0	0	0	0	0	0	0	0	0	0	0
P42785	Lysosomal Pro-X carboxypeptidase	PRCP	0	0	0	0	0	0	0	0	0	0	0	0	0	0	0	0	0	0	0	0	0	0	0	0	0	0	0	0	0	18677	0	0	0	0	0	0	0	0	0	0	0	0	0	0	0	0	0
P43034	Platelet-activating factor acetylhydrolase IB subunit beta	PAFAH1B1	0	0	0	0	0	0	0	0	0	0	0	0	0	0	0	0	0	0	0	0	0	0	0	0	0	0	0	0	550680	132590	0	0	0	0	0	0	0	0	0	0	0	0	0	64947	0	82283	51179
P43121	Cell surface glycoprotein MUC18	MCAM	0	0	0	0	0	0	0	0	0	0	0	0	0	0	0	0	0	0	0	0	0	0	0	0	0	0	0	0	0	0	0	0	0	0	0	0	0	0	0	0	0	0	0	0	34152	0	0
P43307	Translocon-associated protein subunit alpha	SSR1	0	0	0	0	0	0	0	0	0	0	0	0	0	0	0	0	0	0	0	0	0	0	0	0	0	0	0	0	277240	172780	0	0	0	0	0	0	0	0	0	0	0	0	0	0	0	0	0
P43490	Nicotinamide phosphoribosyltransferase	NAMPT	0	0	0	0	0	0	0	0	0	0	0	0	0	0	0	0	0	0	0	0	0	0	0	0	0	0	0	0	0	116010	0	0	0	0	0	0	0	0	0	0	0	0	0	0	0	93810	0
P45378	Troponin T, fast skeletal muscle	TNNT3	0	0	0	0	0	0	0	20080	0	0	0	0	0	0	0	1426800	0	0	0	0	105850	16273	0	0	0	0	0	0	0	0	0	0	0	0	287490	0	0	0	0	0	0	0	0	0	0	0	0
P45880	Voltage-dependent anion-selective channel protein 2	VDAC2	0	0	0	0	0	0	0	0	0	0	0	0	0	0	0	0	0	0	0	0	0	0	0	0	0	0	0	0	878580	69198	0	0	0	0	0	0	0	0	0	0	0	0	0	323700	212300	0	0
P45974	Ubiquitin carboxyl-terminal hydrolase 5	USP5	0	0	0	0	0	0	0	0	0	0	0	0	0	0	0	0	0	0	0	0	0	0	0	0	0	0	0	0	28214	45632	0	0	0	0	0	0	0	0	0	0	0	0	0	0	0	0	24532
P46776	Large ribosomal subunit protein uL15	RPL27A	0	0	0	0	0	0	0	0	0	0	0	0	0	0	0	0	0	0	0	0	0	0	0	179380	228070	0	0	0	0	0	140040	0	0	0	274870	0	0	0	0	0	0	0	0	89988	0	0	0
P46777	Large ribosomal subunit protein uL18	RPL5	0	0	0	0	0	0	0	0	0	0	0	0	0	0	0	0	0	0	0	0	0	0	0	0	0	0	0	0	0	0	0	0	0	0	0	0	0	0	0	0	0	0	0	202760	0	112570	0
P46781	Small ribosomal subunit protein uS4	RPS9	0	0	0	0	0	0	0	0	0	0	0	0	0	0	0	0	0	0	0	0	0	0	0	0	38244	45427	0	0	66828	0	27317	14226	0	0	0	0	0	0	0	0	0	0	0	0	0	82484	116520
P46782	Small ribosomal subunit protein uS7	RPS5	0	0	0	0	0	0	0	0	0	0	0	0	0	0	0	0	0	0	0	0	0	0	0	0	0	0	0	0	0	0	0	0	0	0	0	0	0	0	0	0	0	0	0	40062	0	73470	110790
P46940	Ras GTPase-activating-like protein IQGAP1	IQGAP1	0	0	0	0	0	0	0	0	0	0	0	0	0	0	0	0	0	0	0	0	0	0	0	0	0	22519	0	0	368950	693490	0	0	0	0	0	0	0	0	0	0	0	0	0	127540	0	460680	660010
P46976	Glycogenin-1	GYG1	0	0	0	0	0	0	0	0	0	0	0	0	0	0	0	0	0	0	0	0	50675	23325	0	0	0	0	0	0	0	0	0	0	0	0	0	0	0	0	0	0	0	0	0	0	0	0	0
P47755	F-actin-capping protein subunit alpha-2	CAPZA2	0	0	0	0	0	0	0	0	0	0	0	0	0	0	0	204600	0	0	0	0	0	0	0	0	0	0	0	0	0	0	0	0	0	0	0	0	0	0	0	0	0	0	0	0	0	42909	49409
P47756	F-actin-capping protein subunit beta	CAPZB	0	0	0	0	0	0	0	0	0	0	0	0	60483	0	0	335300	0	0	0	0	0	0	0	0	0	0	0	0	155420	0	0	0	0	0	0	0	0	0	0	0	0	0	0	0	0	269380	0
P47895	Retinaldehyde dehydrogenase 3	ALDH1A3	0	0	0	0	0	0	0	0	0	0	0	0	0	0	0	0	0	0	0	0	0	0	0	0	0	0	0	0	38241	0	0	0	0	0	0	0	0	0	0	0	0	0	0	71221	0	0	0
P47914	Large ribosomal subunit protein eL29	RPL29	0	0	0	0	0	0	0	0	0	0	0	0	0	0	0	0	0	0	0	0	0	0	0	0	0	0	0	0	0	0	0	0	0	0	0	0	0	0	0	0	0	0	0	117650	51451	0	0
P47929	Galectin-7	LGALS7	32853	9544.7	0	32926	11918	156870	341320	1409100	48084	394650	584070	355470	852900	2401600	0	0	84456	250910	118490	99771	154430	265730	86522	51078	464440	61761	197710	1546300	11380000	7204300	87471	103600	615140	658070	39457	258470	551880	86764	194840	0	65910	62635	107330	0	0	0	0
P47989	Xanthine dehydrogenase/oxidase	XDH	0	0	0	0	0	0	0	0	0	0	0	0	0	0	0	0	0	0	120790	0	0	0	0	0	0	0	0	0	0	0	0	0	0	0	0	0	0	0	0	31085	0	0	0	0	0	0	0
P48047	ATP synthase subunit O, mitochondrial	ATP5PO	0	0	0	0	0	0	0	0	0	0	0	0	0	0	0	0	0	0	0	0	0	0	0	0	0	0	0	0	0	0	0	0	0	0	0	0	0	0	0	0	0	0	0	0	30528	0	0
P48147	Prolyl endopeptidase	PREP	0	0	0	0	0	0	0	0	0	0	0	0	0	0	0	0	0	0	0	0	0	0	0	0	0	0	0	0	401470	89708	0	0	0	0	0	0	0	0	0	0	0	0	0	0	0	0	0
P48163	NADP-dependent malic enzyme	ME1	0	0	0	0	0	0	0	0	0	0	0	0	0	0	0	0	0	0	0	0	0	0	0	0	0	0	0	0	0	85350	0	0	0	0	0	0	0	0	0	0	0	0	0	0	0	0	0
P48382	DNA-binding protein RFX5	RFX5	0	0	0	0	0	0	0	0	0	4309700	0	0	0	0	0	5144300	13486000	0	0	0	0	20775000	0	18333000	0	0	28772000	33449000	22661000	0	0	0	33091000	9514000	0	0	25860000	0	0	0	0	0	0	0	0	0	0
P48444	Coatomer subunit delta	ARCN1	0	0	0	0	0	0	0	0	0	0	0	0	0	0	0	0	0	0	0	0	0	0	0	0	0	0	0	0	0	0	0	0	0	0	0	0	0	0	0	0	0	0	0	36035	0	27201	0
P48594	Serpin B4	SERPINB4	0	0	0	0	0	0	52997	39535	0	46138	165420	0	168600	120070	0	0	0	30816	0	30681	0	0	17172	0	0	0	0	495860	3410400	10742000	337630	0	0	0	0	0	82852	0	16854	0	0	0	0	0	0	0	0
P48637	Glutathione synthetase	GSS	0	0	0	0	0	0	0	0	0	0	0	0	0	0	0	0	0	0	0	0	0	0	0	0	0	0	0	0	204480	0	0	0	0	0	0	0	0	0	0	0	0	0	0	0	0	0	0
P48643	T-complex protein 1 subunit epsilon	CCT5	0	0	0	0	0	0	0	0	0	0	0	0	0	0	0	0	0	0	0	0	0	0	0	0	0	0	0	0	0	0	0	0	0	0	0	0	0	0	0	0	0	0	0	149770	0	0	0
P48735	Isocitrate dehydrogenase [NADP], mitochondrial	IDH2	0	0	0	0	0	0	0	0	0	0	0	0	0	0	0	33087	0	0	0	0	0	0	0	0	0	0	0	0	0	0	0	0	0	0	0	0	0	0	0	0	0	0	0	54930	0	246100	56376
P48788	Troponin I, fast skeletal muscle	TNNI2	0	0	0	0	0	0	0	0	0	0	0	0	0	0	0	829180	0	0	0	0	226020	116880	0	178480	0	270270	0	0	0	0	0	0	0	0	558500	0	0	0	0	0	0	0	0	0	0	0	0
P49189	4-trimethylaminobutyraldehyde dehydrogenase	ALDH9A1	0	0	0	0	0	0	0	30076	0	0	0	0	93389	0	0	0	0	0	0	0	0	0	0	0	0	0	0	75050	0	0	0	0	0	0	0	0	77060	0	0	0	0	0	0	0	0	0	97364
P49247	Ribose-5-phosphate isomerase	RPIA	0	0	0	0	0	0	0	0	0	0	0	0	0	0	0	0	0	0	0	0	0	0	0	0	0	0	0	0	141870	0	0	0	0	0	0	0	0	0	0	0	0	0	0	0	0	0	0
P49257	Protein ERGIC-53	LMAN1	0	0	0	0	0	0	0	0	0	0	0	0	0	0	0	0	0	0	0	0	0	0	0	0	0	0	0	0	0	0	0	0	0	0	0	0	0	0	0	0	0	0	0	78410	0	36138	0
P49321	Nuclear autoantigenic sperm protein	NASP	0	0	0	0	0	0	0	0	0	0	0	0	0	0	0	0	0	0	0	0	0	0	0	0	0	0	0	0	0	0	0	0	0	0	0	0	0	0	0	0	0	0	0	0	0	31347	0
P49327	Fatty acid synthase	FASN	0	0	0	0	0	0	0	0	0	0	0	0	0	0	0	0	0	0	0	0	0	0	0	0	48831	0	0	0	0	46905	0	0	0	0	0	0	0	0	0	0	0	0	0	90288	37902	0	694480
P49368	T-complex protein 1 subunit gamma	CCT3	0	0	0	0	0	0	90863	0	0	1028900	0	0	0	608950	0	0	0	0	0	0	0	0	0	0	447580	0	0	0	314450	0	186190	0	0	0	207300	0	0	0	0	0	0	0	0	40810	0	0	0
P49411	Elongation factor Tu, mitochondrial	TUFM	0	0	0	0	0	0	0	0	0	0	0	0	0	0	0	0	0	0	0	0	0	0	0	0	0	0	17878	0	0	0	0	0	0	0	0	0	0	0	0	0	0	0	0	0	0	0	39744
P49720	Proteasome subunit beta type-3	PSMB3	0	0	0	0	0	0	0	0	0	0	0	0	0	13512	0	0	0	20478	29066	0	0	0	0	0	0	0	93379	31740	1110000	491450	0	0	0	0	0	0	0	0	0	0	0	0	0	0	0	0	104460
P49721	Proteasome subunit beta type-2	PSMB2	0	0	0	0	0	0	0	0	0	25538	0	0	0	44516	0	0	0	0	21595	0	0	0	0	0	0	0	25180	0	220810	199040	22494	0	38749	0	0	0	48971	0	0	0	0	0	0	0	0	0	0
P49748	Very long-chain specific acyl-CoA dehydrogenase, mitochondrial	ACADVL	0	0	0	0	0	0	0	0	0	0	0	0	0	0	0	0	0	0	0	0	0	0	0	0	0	0	0	0	0	120290	0	0	0	0	0	0	0	0	0	0	0	0	0	63833	0	87746	497090
P49753	Acyl-coenzyme A thioesterase 2, mitochondrial	ACOT2	0	0	0	0	0	0	0	0	0	0	0	0	0	0	0	0	0	0	0	0	0	0	0	0	0	0	0	0	0	0	0	0	0	0	0	0	0	0	0	0	0	0	0	0	0	0	0
P49755	Transmembrane emp24 domain-containing protein 10	TMED10	0	0	0	0	0	0	0	0	0	0	0	0	0	0	0	0	0	0	0	0	0	0	0	0	0	0	0	0	709830	84737	0	0	0	0	0	0	0	0	0	0	0	0	0	0	0	95264	80541
P49862	Kallikrein-7	KLK7	0	0	0	0	0	46481	77903	56069	0	170060	54319	23707	83119	161500	0	0	65086	181510	145250	22327	0	51876	41095	0	66352	38829	487690	326610	573030	714640	42144	32195	0	31851	0	0	325880	0	38798	76922	0	0	0	0	0	0	0
P49903	Selenide, water dikinase 1	SEPHS1	0	0	0	0	0	0	0	0	0	0	0	0	0	0	0	0	0	0	0	0	0	0	0	0	0	0	0	0	0	0	0	0	0	0	0	0	0	0	0	0	0	0	0	0	0	32237	0
P50148	Guanine nucleotide-binding protein G(q) subunit alpha	GNAQ	0	0	0	0	0	0	0	0	0	0	0	0	0	0	0	0	0	0	0	0	0	0	0	0	0	0	0	0	0	0	0	0	0	0	0	0	0	0	0	0	0	0	0	0	26902	0	44164
P50395	Rab GDP dissociation inhibitor beta	GDI2	0	0	0	0	0	0	0	0	0	0	0	0	50319	36800	0	0	0	0	0	0	0	0	0	0	0	0	86577	0	21935	778470	0	0	0	0	0	0	0	0	0	0	0	0	0	14982	17747	77479	0
P50452	Serpin B8	SERPINB8	0	0	0	0	0	0	46455	40790	0	0	0	0	0	50421	0	0	0	0	32701	0	0	0	15304	0	0	0	0	0	47299	0	0	0	0	9363.5	0	0	45114	0	36627	0	0	0	0	0	0	0	0
P50454	Serpin H1	SERPINH1	0	0	0	0	0	0	0	0	0	0	0	0	0	0	0	0	0	0	0	0	0	0	0	0	0	0	0	0	0	0	0	0	0	0	0	0	0	0	0	0	0	0	0	241180	12640	3625000	243290
P50502	Hsc70-interacting protein	ST13	0	0	0	0	0	0	0	0	0	0	0	0	0	0	0	0	0	0	0	0	0	0	0	0	0	0	0	0	0	0	0	0	0	0	0	0	0	0	0	0	0	0	0	0	0	59929	0
P50897	Palmitoyl-protein thioesterase 1	PPT1	0	0	0	0	0	0	0	0	0	0	0	0	0	0	0	0	0	0	0	0	0	0	0	0	0	0	0	0	81116	0	0	0	0	0	0	0	0	0	0	0	0	0	0	0	0	0	0
P50990	T-complex protein 1 subunit theta	CCT8	0	0	0	0	0	0	0	0	0	0	0	0	0	0	0	0	0	0	0	0	0	0	0	0	0	0	0	0	0	36041	0	0	0	0	0	0	0	0	0	0	0	0	0	82799	85810	153560	0
P50991	T-complex protein 1 subunit delta	CCT4	0	0	0	0	0	0	0	0	0	0	0	0	0	0	0	0	0	0	0	0	0	0	0	0	0	0	0	0	0	0	0	0	0	0	0	0	0	0	0	0	0	0	0	36719	11674	409840	0
P50993	Sodium/potassium-transporting ATPase subunit alpha-2	ATP1A2	0	0	0	0	0	0	0	0	0	0	0	0	0	0	0	0	0	0	0	0	31568	0	0	0	0	0	0	0	0	0	0	0	0	0	176260	0	0	0	0	0	0	0	0	0	0	0	0
P50995	Annexin A11	ANXA11	0	0	0	0	0	0	0	0	0	0	0	0	0	0	0	13560	0	0	0	0	0	0	0	0	0	0	0	0	78865	36917	0	0	0	0	0	0	0	0	0	0	0	0	0	0	0	0	0
P51148	Ras-related protein Rab-5C	RAB5C	0	0	0	0	0	0	0	0	0	0	0	0	0	0	0	0	0	0	0	0	0	0	0	0	0	0	0	0	131370	100220	0	0	0	0	0	0	0	0	0	0	0	0	0	0	0	15521	59600
P51149	Ras-related protein Rab-7a	RAB7A	0	0	0	0	0	0	0	0	0	0	0	0	0	0	0	0	0	0	0	0	0	0	0	0	0	0	0	0	111650	689090	0	0	0	0	0	41147	0	0	0	0	0	0	0	54505	0	0	0
P51571	Translocon-associated protein subunit delta	SSR4	0	0	0	0	0	0	0	0	0	0	0	0	0	0	0	0	0	0	0	0	0	0	0	0	0	0	36028	0	155510	65268	0	9530.2	0	0	0	0	0	0	0	0	0	0	0	0	0	0	0
P51572	B-cell receptor-associated protein 31	BCAP31	0	0	0	0	0	0	0	0	0	0	0	0	0	0	0	0	0	0	0	0	0	0	0	0	0	0	0	0	168970	0	0	0	0	0	0	0	0	0	0	0	0	0	0	208550	103500	0	0
P51636	Caveolin-2	CAV2	0	0	0	0	0	0	0	0	0	0	0	0	0	0	0	0	0	0	0	0	0	0	0	0	0	0	0	0	0	0	0	0	0	0	0	0	0	0	0	0	0	0	0	0	46088	0	41978
P51648	Aldehyde dehydrogenase family 3 member A2	ALDH3A2	0	0	0	0	0	0	0	0	0	0	0	0	0	0	0	0	0	0	0	0	0	0	0	0	0	0	0	0	0	34382	0	0	0	0	0	0	0	0	0	0	0	0	0	1028500	0	0	0
P51659	Peroxisomal multifunctional enzyme type 2	HSD17B4	0	0	0	0	0	0	0	0	0	0	0	0	0	22091	0	0	0	19091	0	0	0	0	0	0	0	0	0	0	70311	260490	0	0	0	0	0	0	0	0	0	0	0	0	0	0	0	0	0
P51688	N-sulphoglucosamine sulphohydrolase	SGSH	0	0	0	0	0	0	0	0	0	0	0	0	0	0	0	0	0	0	0	0	0	0	0	0	0	0	0	0	41044	0	0	0	0	0	0	0	0	0	0	0	0	0	0	0	0	0	0
P51884	Lumican	LUM	0	0	186060	0	0	0	0	0	254880	0	0	0	0	0	0	0	0	0	0	0	203920	344270	929950	2707800	2011300	1701200	660120	522980	2007000	2679200	2004600	2671100	622320	457570	873280	3800800	132690	0	65931	0	0	0	0	7786000	4570800	3580600	2786400
P51888	Prolargin	PRELP	0	0	0	0	0	0	0	0	17683	0	0	0	0	0	0	0	0	0	0	0	0	0	121090	991430	269250	525060	137450	38411	525190	695480	264570	97364	0	42015	468950	100900	0	0	0	0	0	0	0	517890	202410	250810	373300
P51991	Heterogeneous nuclear ribonucleoprotein A3	HNRNPA3	0	0	0	0	0	0	0	0	0	0	0	0	0	0	0	0	0	0	0	0	0	0	0	0	0	0	0	0	18355	105760	0	0	0	0	0	0	0	0	0	0	0	0	0	237460	30131	427070	90772
P52179	Myomesin-1	MYOM1	0	0	0	0	0	0	0	0	0	0	0	0	0	0	0	1420400	0	0	0	0	42206	87271	0	0	0	0	0	0	0	0	0	0	0	0	148260	0	0	0	0	0	0	0	0	110780	0	0	0
P52209	6-phosphogluconate dehydrogenase, decarboxylating	PGD	0	0	0	0	0	0	0	0	0	0	0	0	35463	0	0	0	0	0	0	0	0	0	0	0	0	0	0	0	0	21289	0	0	0	0	0	0	0	0	0	0	0	0	0	151460	0	0	0
P52272	Heterogeneous nuclear ribonucleoprotein M	HNRNPM	0	0	0	0	0	0	0	0	0	0	0	0	0	0	0	0	0	0	0	0	0	0	0	0	0	0	0	0	65775	0	0	0	0	0	0	0	0	0	0	0	0	0	0	12848	0	562160	277360
P52565	Rho GDP-dissociation inhibitor 1	ARHGDIA	0	0	0	0	0	0	0	0	0	0	0	0	0	0	0	0	0	0	0	0	0	0	0	0	61597	0	0	0	78086	0	0	0	0	0	0	0	0	0	0	0	0	0	0	216040	0	0	941410
P52566	Rho GDP-dissociation inhibitor 2	ARHGDIB	0	0	0	0	0	0	0	0	0	0	0	0	0	0	0	0	0	0	0	0	0	0	0	0	0	0	0	0	0	0	0	0	0	0	0	0	0	0	0	0	0	0	0	85563	0	51640	0
P52597	Heterogeneous nuclear ribonucleoprotein F	HNRNPF	0	0	0	0	0	0	0	0	0	0	0	0	0	0	0	0	0	0	0	0	0	0	0	0	0	0	0	0	0	38014	0	0	0	0	0	0	0	0	0	0	0	0	0	23703	0	269060	0
P52907	F-actin-capping protein subunit alpha-1	CAPZA1	0	0	0	0	0	0	0	0	0	0	0	0	49574	0	0	273990	0	0	0	0	0	0	0	0	0	0	0	0	192340	683410	0	0	0	0	0	0	0	0	0	0	0	0	0	0	0	490590	0
P53004	Biliverdin reductase A	BLVRA	0	0	0	0	0	0	0	0	0	0	0	0	0	0	0	0	0	0	0	0	0	0	0	0	0	0	0	0	0	0	0	0	0	0	0	0	0	0	0	0	0	0	0	30486	0	46827	0
P53396	ATP-citrate synthase	ACLY	0	0	0	0	0	0	0	0	0	0	0	0	0	0	0	0	0	0	0	0	0	0	0	0	0	0	0	0	0	131760	0	0	0	0	0	0	0	0	0	0	0	0	0	0	0	0	0
P53597	Succinate--CoA ligase [ADP/GDP-forming] subunit alpha, mitochondrial	SUCLG1	0	0	0	0	0	0	0	0	0	0	0	0	0	0	0	0	0	0	0	0	0	0	0	0	0	0	0	0	0	0	0	0	0	0	0	0	0	0	0	0	0	0	0	0	0	0	67247
P53618	Coatomer subunit beta	COPB1	0	0	0	0	0	0	0	0	0	0	0	0	0	0	0	0	0	0	0	0	0	0	0	0	0	0	0	0	0	0	0	0	0	0	0	0	0	0	0	0	0	0	0	132660	0	23479	22991
P53621	Coatomer subunit alpha	COPA	0	0	0	0	0	0	0	0	0	0	0	0	0	0	0	0	0	0	0	0	0	0	0	0	0	0	0	0	0	0	0	0	0	0	0	0	0	0	0	0	0	0	0	0	0	72655	0
P53634	Dipeptidyl peptidase 1	CTSC	0	0	0	0	0	0	9592.5	0	0	91960	23848	0	0	0	0	0	0	0	0	0	0	0	0	0	0	0	0	0	1558700	0	0	0	0	0	0	0	0	0	0	0	0	0	0	0	0	0	0
P53985	Monocarboxylate transporter 1	SLC16A1	0	0	0	0	0	0	0	0	0	0	0	0	0	0	0	0	0	0	0	0	0	0	0	0	0	0	0	0	0	0	0	0	0	0	0	0	0	0	0	0	0	0	0	27696	0	0	0
P53999	Activated RNA polymerase II transcriptional coactivator p15	SUB1	0	0	0	0	0	0	0	0	0	0	0	0	0	0	0	0	0	0	0	0	0	0	0	0	0	0	0	0	0	197830	0	0	0	0	0	0	0	0	0	0	0	0	0	0	0	0	0
P54296	Myomesin-2	MYOM2	0	0	0	0	0	0	0	0	0	0	0	0	0	0	0	4407000	0	0	0	0	293760	30309	0	78810	0	157370	0	0	0	0	0	0	0	0	84184	0	0	0	0	0	0	0	0	0	0	0	0
P54707	Potassium-transporting ATPase alpha chain 2	ATP12A	0	0	0	0	0	0	0	0	0	0	0	0	0	0	0	0	0	0	0	0	0	0	0	0	0	0	0	0	2502000	0	0	0	0	0	0	0	0	0	0	0	0	0	0	45805	0	0	0
P54826	Growth arrest-specific protein 1	GAS1	0	0	0	0	0	0	0	0	0	775690	0	269400	0	0	0	0	410700	374680	0	0	0	297720	0	0	0	0	0	0	0	0	0	0	0	0	0	0	0	48436	102520	0	0	151670	0	0	0	0	0
P54920	Alpha-soluble NSF attachment protein	NAPA	0	0	0	0	0	0	0	0	0	0	0	0	0	0	0	0	0	0	0	0	0	0	0	0	0	0	0	0	0	69690	0	0	0	0	0	0	0	0	0	0	0	0	0	0	0	0	0
P55072	Transitional endoplasmic reticulum ATPase	VCP	0	0	0	0	0	0	0	0	0	0	0	0	0	0	0	0	0	0	0	0	0	0	0	0	0	0	0	0	174420	1720100	0	0	0	0	0	0	0	0	0	0	0	0	0	158350	106600	1358400	638710
P55084	Trifunctional enzyme subunit beta, mitochondrial	HADHB	0	0	0	0	0	0	0	0	0	0	0	0	0	0	0	0	0	0	0	0	0	0	0	0	0	0	0	0	0	0	0	0	0	0	45883	0	0	0	0	0	0	0	0	102740	0	0	60256
P55268	Laminin subunit beta-2	LAMB2	0	0	0	0	0	0	0	0	0	0	0	0	0	0	0	0	0	0	0	0	0	0	0	0	0	0	0	0	0	0	256380	0	0	0	35926	0	0	0	0	0	0	0	0	26871	0	0	31983
P55786	Puromycin-sensitive aminopeptidase	NPEPPS	0	0	0	0	0	0	0	0	0	0	0	0	0	0	0	56299	0	0	0	0	0	0	0	0	0	0	0	0	351740	322780	0	0	0	0	0	0	25892	0	0	0	0	0	0	0	0	63611	46693
P55809	Succinyl-CoA:3-ketoacid coenzyme A transferase 1, mitochondrial	OXCT1	0	0	0	0	0	0	0	0	0	0	0	0	0	0	0	0	0	0	0	0	0	0	0	0	0	0	0	0	0	0	0	0	0	0	0	0	0	0	0	0	0	0	0	0	0	0	0
P56134	ATP synthase subunit f, mitochondrial	ATP5MF	0	0	0	0	0	0	0	0	0	0	0	0	0	0	0	0	0	0	0	0	0	0	0	0	0	0	0	0	0	0	0	0	0	0	0	0	0	0	0	0	0	0	0	0	0	28228	0
P56537	Eukaryotic translation initiation factor 6	EIF6	0	0	0	0	0	0	0	7690.7	0	0	0	0	0	17579	0	0	0	0	0	0	0	0	0	0	0	0	14218	18592	41872	35023	0	0	0	0	0	0	15270	0	0	0	0	0	0	0	0	0	0
P57088	Transmembrane protein 33	TMEM33	0	0	0	0	0	0	0	0	0	0	0	0	0	0	0	0	0	0	0	0	0	0	0	0	0	0	0	0	0	47157	0	0	0	0	0	15016	0	0	0	0	0	0	0	0	0	0	0
P58107	Epiplakin	EPPK1	0	0	0	0	0	0	0	92571	0	0	0	0	0	0	0	0	0	0	0	0	0	0	0	0	0	0	0	0	1288800	1437300	0	0	0	0	0	0	0	0	0	0	0	0	0	0	0	0	0
P59666	Neutrophil defensin 3	DEFA3	0	0	0	0	0	0	0	0	0	0	0	0	0	0	0	0	0	0	0	0	0	0	0	0	0	0	0	0	0	0	0	0	0	0	0	0	0	0	0	0	0	0	0	0	0	424310	456010
P59998	Actin-related protein 2/3 complex subunit 4	ARPC4	0	0	0	0	0	0	0	0	0	0	0	0	0	0	0	0	0	0	0	0	0	0	18131	0	0	0	0	0	135380	516020	0	61815	0	0	0	0	0	0	0	0	0	0	0	0	0	226580	0
P60033	CD81 antigen	CD81	0	0	0	0	0	0	0	0	0	0	0	0	0	0	0	0	0	0	0	0	0	0	0	0	0	0	0	0	0	0	0	0	0	0	0	0	0	0	0	0	0	0	0	189150	0	0	0
P60174	Triosephosphate isomerase	TPI1	0	0	0	0	0	0	0	193870	0	209740	224750	44053	112150	97236	0	2695800	34500	68428	38623	0	0	43542	0	0	0	0	129900	161210	164750	3171800	0	0	0	0	33496	0	0	0	51909	32688	0	0	0	1250000	712480	2666900	397850
P60660	Myosin light polypeptide 6	MYL6	0	0	0	0	0	0	0	0	0	0	0	0	54067	0	0	0	0	0	0	0	86223	117280	0	74667	0	118180	0	0	519760	289580	0	0	0	0	0	0	0	0	0	0	0	0	0	0	0	688890	81669
P60709	Actin, cytoplasmic 1	ACTB	0	0	0	0	0	0	0	0	0	0	0	0	0	0	0	0	0	0	0	0	0	0	0	0	0	0	0	0	0	0	0	0	0	0	0	0	0	0	0	0	0	0	0	32925	137790	0	0
P60842	Eukaryotic initiation factor 4A-I	EIF4A1	0	0	0	0	0	0	0	0	0	0	0	0	29968	0	0	58161	0	0	0	0	0	0	0	27165	70095	46210	0	0	967040	1667900	47845	0	0	0	35707	26017	0	0	0	0	0	0	0	40170	0	0	0
P60866	Small ribosomal subunit protein uS10	RPS20	0	0	0	0	0	0	0	0	0	0	0	0	0	0	0	0	0	0	0	0	0	0	0	0	0	0	0	25769	74844	21167	0	0	0	0	0	0	0	0	0	0	0	0	0	0	0	131910	35467
P60900	Proteasome subunit alpha type-6	PSMA6	0	0	0	0	0	12331	0	0	0	76514	0	35456	32726	244630	0	54232	0	156910	42515	36281	0	0	0	0	0	18046	0	85519	2625800	161240	0	0	0	0	0	0	71126	17769	34988	43604	0	0	0	24388	0	62622	0
P60903	Protein S100-A10	S100A10	0	0	0	0	0	0	0	0	0	0	28110	0	0	0	0	0	0	0	0	0	0	0	0	0	0	0	0	0	303530	0	17733	0	0	0	0	0	0	0	0	0	0	0	0	0	0	0	0
P60953	Cell division control protein 42 homolog	CDC42	0	0	0	0	0	0	0	0	0	0	0	0	0	0	0	0	0	0	0	0	0	0	0	0	0	0	0	0	0	0	0	0	0	0	0	0	0	0	0	0	0	0	0	0	0	0	95604
P60981	Destrin	DSTN	0	0	0	0	0	0	0	0	0	0	0	0	0	0	0	0	0	0	0	0	0	0	0	0	0	0	0	0	34391	57739	0	0	0	0	0	0	0	0	0	0	0	0	0	0	0	0	0
P60983	Glia maturation factor beta	GMFB	0	0	0	0	0	0	0	0	0	0	0	0	0	0	0	0	0	0	0	0	0	0	0	0	0	0	0	0	0	0	0	0	0	0	0	0	0	0	0	0	0	0	0	0	0	89952	0
P60985	Keratinocyte differentiation-associated protein	KRTDAP	0	0	0	0	0	0	0	0	0	0	0	0	0	0	0	0	0	0	0	0	0	0	0	0	0	0	0	0	35741	0	0	0	0	0	0	0	0	0	0	0	0	0	0	0	0	0	0
P61006	Ras-related protein Rab-8A	RAB8A	0	0	0	0	0	0	0	0	0	0	0	0	0	0	0	0	0	0	0	0	0	0	0	0	0	0	0	0	0	0	0	0	0	0	0	0	0	0	0	0	0	0	0	28297	9184.9	29564	0
P61019	Ras-related protein Rab-2A	RAB2A	0	0	0	0	0	0	0	0	0	0	0	0	0	0	0	0	0	0	0	0	0	0	0	0	0	0	0	0	64460	17175	0	0	0	0	0	0	0	0	0	0	0	0	0	130020	37150	0	37237
P61106	Ras-related protein Rab-14	RAB14	0	0	0	0	0	0	0	0	0	0	0	0	17956	0	0	0	0	0	0	0	0	0	0	0	0	0	0	0	156920	179450	0	0	0	0	0	0	0	0	0	0	0	0	0	51982	16303	0	0
P61158	Actin-related protein 3	ACTR3	0	0	0	0	0	0	0	0	0	0	0	0	0	0	0	0	0	0	0	0	0	0	0	0	0	0	0	0	0	417710	0	0	0	0	0	0	0	0	0	0	0	0	0	0	0	0	0
P61160	Actin-related protein 2	ACTR2	0	0	0	0	0	0	0	0	0	0	0	0	0	0	0	0	0	0	0	0	0	0	0	0	0	0	0	0	77583	155740	0	0	0	0	0	0	0	0	0	0	0	0	0	36615	0	97282	0
P61204	ADP-ribosylation factor 3	ARF3	0	0	0	0	0	0	0	0	0	0	0	0	0	0	0	0	0	0	0	0	0	0	0	0	0	0	0	0	541430	364070	0	0	0	0	0	0	0	0	0	0	0	0	0	0	0	646710	457370
P61221	ATP-binding cassette sub-family E member 1	ABCE1	0	0	0	0	0	0	0	0	0	188420	0	0	0	81098	0	0	0	45402	64158	0	0	0	0	0	0	0	0	0	0	0	0	0	0	0	0	0	0	0	0	0	0	0	0	0	0	0	0
P61224	Ras-related protein Rap-1b	RAP1B	0	0	0	0	0	0	0	0	0	0	0	0	0	0	0	0	0	0	0	0	0	0	0	0	0	0	0	0	0	0	0	0	0	0	0	0	0	0	0	0	0	0	0	333500	172600	0	0
P61247	Small ribosomal subunit protein eS1	RPS3A	0	0	0	0	0	0	0	0	0	0	0	0	0	0	0	0	0	0	0	0	0	0	0	0	0	0	0	0	0	0	0	0	0	0	0	0	0	0	0	0	0	0	0	182240	83141	124010	95530
P61254	Large ribosomal subunit protein uL24	RPL26	0	0	0	0	0	0	0	0	0	0	0	0	0	0	0	0	0	0	0	0	0	0	0	0	0	0	0	20234	0	0	0	0	0	0	0	0	0	0	0	0	0	0	0	35651	0	0	0
P61313	Large ribosomal subunit protein eL15	RPL15	0	0	0	0	0	0	0	0	0	0	0	0	0	0	0	0	0	0	0	0	0	0	0	0	213220	0	0	0	0	0	0	0	95384	0	0	0	0	0	0	0	0	0	0	0	0	40333	0
P61513	Large ribosomal subunit protein eL43	RPL37A	0	0	0	0	0	0	0	0	0	0	0	0	0	0	0	0	0	0	0	0	0	0	0	0	0	0	0	0	0	103270	0	0	0	0	0	0	0	0	0	0	0	0	0	0	0	0	0
P61604	10 kDa heat shock protein, mitochondrial	HSPE1	0	0	0	0	0	0	0	0	0	0	0	0	0	0	0	0	0	0	0	0	0	0	0	0	0	0	0	0	40688	0	0	0	0	0	0	0	0	0	0	0	0	0	0	0	0	74683	0
P61626	Lysozyme C	LYZ	35260	0	0	13136	0	294030	93790	218130	1091300	328210	166280	421800	2288500	384260	0	561490	73524	138580	0	271190	173720	128020	236650	197930	57140	264490	646110	660520	307650	312330	3016400	456850	392320	364280	181530	369780	762090	136530	129350	67155	100590	424750	79358	0	0	0	0
P61803	Dolichyl-diphosphooligosaccharide--protein glycosyltransferase subunit DAD1	DAD1	17667	0	0	0	0	0	0	0	0	0	0	0	0	0	0	0	0	0	0	0	0	0	0	0	43932	128050	12070	74508	415880	90928	0	51632	48829	21730	75390	0	0	0	0	0	0	0	0	0	0	0	0
P61923	Coatomer subunit zeta-1	COPZ1	0	0	0	0	0	0	0	0	0	0	0	0	0	0	0	0	0	0	0	0	0	0	0	0	0	0	0	0	0	0	0	0	0	0	0	0	0	0	0	0	0	0	0	0	0	34814	0
P61978	Heterogeneous nuclear ribonucleoprotein K	HNRNPK	0	0	0	0	0	0	0	0	0	0	0	0	0	0	0	0	0	0	0	0	0	0	0	0	0	0	0	0	0	21830	0	0	0	0	0	0	0	0	0	0	0	0	0	0	12946	378170	65013
P61981	14-3-3 protein gamma	YWHAG	0	0	0	0	0	0	0	0	0	0	0	0	0	0	0	91956	0	0	0	0	0	13501	0	0	51462	36214	0	0	412580	263640	33742	0	0	0	113410	0	0	0	0	0	0	0	0	0	0	553010	0
P62081	Small ribosomal subunit protein eS7	RPS7	0	0	0	0	0	0	0	0	0	0	0	0	0	0	0	0	0	0	0	0	0	0	0	0	0	0	0	0	25023	25115	0	0	0	0	0	0	0	0	0	0	0	0	0	0	0	0	30615
P62241	Small ribosomal subunit protein eS8	RPS8	0	0	0	0	0	0	0	0	0	0	0	0	0	0	0	0	0	0	0	0	0	0	30839	98535	73596	0	0	0	201420	218470	0	48255	0	0	0	0	0	0	0	0	0	0	0	644840	129080	0	0
P62244	Small ribosomal subunit protein uS8	RPS15A	0	0	0	0	0	0	0	0	0	0	0	0	0	0	0	0	0	0	0	0	0	0	0	0	0	0	0	0	165110	201620	0	0	0	0	0	0	0	0	0	0	0	0	0	0	0	0	0
P62249	Small ribosomal subunit protein uS9	RPS16	0	0	0	0	0	0	0	0	0	0	0	0	0	0	0	0	0	0	0	0	0	0	0	0	0	0	0	19818	0	0	0	0	0	0	0	0	0	0	0	0	0	0	0	0	0	0	0
P62258	14-3-3 protein epsilon	YWHAE	0	0	0	0	0	0	0	14779	0	0	0	0	0	0	0	161480	0	0	0	0	0	0	0	0	0	0	0	0	325750	884210	0	0	0	0	0	0	0	0	0	0	0	0	0	383250	298590	411690	186570
P62263	Small ribosomal subunit protein uS11	RPS14	0	0	0	0	0	0	0	0	0	0	0	0	0	0	0	0	0	0	0	0	0	0	0	0	0	0	0	0	0	0	0	0	0	0	0	0	0	0	0	0	0	0	0	123460	0	145260	0
P62280	Small ribosomal subunit protein uS17	RPS11	0	0	0	0	0	0	0	0	0	0	0	0	0	0	0	0	0	0	0	0	0	0	0	0	0	0	0	0	242250	86414	0	0	0	0	0	0	0	0	0	0	0	0	0	50197	15819	0	0
P62304	Small nuclear ribonucleoprotein E	SNRPE	0	0	0	0	0	0	0	0	0	0	0	0	0	0	0	0	0	0	0	0	0	0	0	0	0	0	0	0	130370	73964	0	0	0	0	0	0	0	0	0	0	0	0	0	0	0	18169	0
P62314	Small nuclear ribonucleoprotein Sm D1	SNRPD1	0	0	0	0	0	0	0	0	0	0	0	0	0	0	0	0	0	0	0	0	0	0	0	0	0	0	0	0	0	24139	0	0	0	0	0	0	0	0	0	0	0	0	0	0	0	0	0
P62328	Thymosin beta-4;Hemoregulatory peptide AcSDKP	TMSB4X	0	0	0	0	0	0	0	0	0	0	0	0	109560	0	0	0	0	0	0	0	0	0	0	0	0	0	0	0	0	0	0	0	0	0	0	0	0	0	0	0	0	0	0	0	0	859300	92070
P62424	Large ribosomal subunit protein eL8	RPL7A	0	0	0	0	0	0	0	0	0	0	0	0	0	0	0	0	0	0	0	0	0	0	0	33684	0	0	0	0	0	28827	0	0	0	0	45789	0	0	0	0	0	0	0	0	111340	0	306240	0
P67775	Serine/threonine-protein phosphatase 2A catalytic subunit alpha isoform	PPP2CA	0	0	0	0	0	0	0	0	0	0	0	0	0	0	0	0	0	0	0	0	0	0	0	0	0	0	0	0	24307	44926	0	0	0	0	0	0	0	0	0	0	0	0	0	0	0	0	0
P62736	Actin, aortic smooth muscle	ACTA2	0	1310300	0	0	14836	179550	324860	6329300	18369	361250	1953300	1145200	3747000	399020	47266	218690000	434260	138720	165740	2123000	30221000	43302000	59946	27993000	1034600	35904000	1145400	5073400	28576000	22685000	5818800	1679700	1522500	1528200	62201000	549300	91732	23146	261360	68698	0	44196	57499	16989000	9064900	25052000	13983000
P62750	Large ribosomal subunit protein uL23	RPL23A	0	0	0	0	0	0	0	0	0	0	0	0	0	0	0	0	0	0	0	0	0	0	0	0	0	0	0	0	0	0	0	0	0	0	0	0	0	0	0	0	0	0	0	68102	0	290810	0
P62753	Small ribosomal subunit protein eS6	RPS6	0	0	0	0	0	0	0	0	0	0	0	0	0	0	0	0	0	0	0	0	0	0	0	0	0	0	0	0	0	139410	0	0	0	0	0	0	0	0	0	0	0	0	0	151970	0	139020	0
P62805	Histone H4	H4C1	455070	336310	3124200	0	23101	0	16930	0	2792100	0	1075300	488390	3501600	0	118180	466850	216950	0	0	50911	444160	1484900	6655200	16371000	9774300	14601000	6324400	8712700	10205000	10367000	10531000	14158000	6878500	6207600	9682800	11036000	2843000	73966	1812000	0	561810	282380	0	6126500	1573800	26414000	16125000
P62820	Ras-related protein Rab-1A	RAB1A	0	0	0	0	0	0	0	0	0	0	0	0	0	0	0	0	0	0	0	0	0	0	0	0	0	0	0	0	531350	0	0	0	0	0	0	0	0	0	0	0	0	0	0	96570	36022	414230	31680
P62826	GTP-binding nuclear protein Ran	RAN	0	0	0	0	0	0	0	0	0	0	0	0	0	0	0	0	0	0	0	0	0	0	0	0	0	0	0	0	0	21656	0	0	0	0	0	0	0	0	0	0	0	0	0	727750	459740	90714	0
P62829	Large ribosomal subunit protein uL14	RPL23	0	0	0	0	0	0	0	0	0	0	0	0	0	0	0	0	0	0	0	0	0	0	0	0	0	0	0	0	0	0	0	0	0	0	0	0	0	0	0	0	0	0	0	0	0	237410	0
P62841	Small ribosomal subunit protein uS19	RPS15	0	0	0	0	0	0	0	0	0	0	0	0	0	0	0	0	0	0	0	0	0	0	0	0	0	0	0	0	0	0	0	0	0	0	0	0	0	0	0	0	0	0	0	0	0	158120	73341
P62854	Small ribosomal subunit protein eS26	RPS26	0	0	0	0	0	0	0	0	0	0	0	0	0	0	0	0	0	0	0	0	0	0	0	0	0	0	0	0	0	0	0	0	0	0	0	0	0	0	0	0	0	0	0	0	0	92223	0
P62861	Ubiquitin-like FUBI-ribosomal protein eS30 fusion protein	FAU	0	0	18462	0	0	0	0	0	0	0	0	0	0	0	0	0	0	0	0	0	0	0	0	0	0	0	0	0	0	0	114170	100950	0	0	0	0	0	0	0	0	0	0	0	0	0	0	0
P62873	Guanine nucleotide-binding protein G(I)/G(S)/G(T) subunit beta-1	GNB1	0	0	0	0	0	0	0	0	0	0	0	0	0	0	0	0	0	0	0	0	0	0	0	0	0	0	0	0	0	0	0	0	0	0	0	0	0	0	0	0	0	0	0	154100	98225	66216	0
P62899	Large ribosomal subunit protein eL31	RPL31	0	0	0	0	0	0	0	0	0	0	0	0	0	0	0	0	0	0	0	0	0	0	0	0	0	0	0	0	0	0	0	0	0	0	0	0	0	0	0	0	0	0	0	66452	0	0	110740
P62913	Large ribosomal subunit protein uL5	RPL11	0	0	0	0	0	0	0	0	0	0	0	0	0	0	0	0	0	0	0	0	0	0	0	0	0	0	0	0	64366	0	0	0	0	0	0	0	0	0	0	0	0	0	0	325450	0	246810	97233
P62917	Large ribosomal subunit protein uL2	RPL8	54579	0	0	0	0	0	0	0	0	0	0	0	0	0	0	0	0	0	0	0	0	0	0	152860	0	0	0	35896	0	85148	0	0	0	0	132100	0	0	0	0	0	0	0	0	37971	0	11866	0
P62937	Peptidyl-prolyl cis-trans isomerase A	PPIA	0	0	0	0	0	0	0	0	0	0	0	0	134280	0	0	36404	0	0	0	0	0	0	0	0	0	0	0	0	1196200	94396	0	0	0	0	0	0	0	0	0	0	0	0	0	2076900	444470	0	140190
P63000	Ras-related C3 botulinum toxin substrate 1	RAC1	0	0	0	0	0	0	0	0	0	0	0	0	0	0	0	0	0	0	0	0	0	0	0	0	0	0	0	0	0	0	0	0	0	0	0	0	0	0	0	0	0	0	0	189100	45301	0	555400
Q15836	Vesicle-associated membrane protein 3	VAMP3	0	0	0	0	0	0	0	0	0	0	0	0	0	0	0	0	0	0	0	0	0	0	0	0	0	0	0	0	0	0	0	0	0	0	0	0	0	0	0	0	0	0	0	47916	0	0	0
P63096	Guanine nucleotide-binding protein G(i) subunit alpha-1	GNAI1	0	0	0	0	0	0	0	0	0	0	0	0	0	0	0	0	0	0	0	0	0	0	0	0	0	0	0	0	0	0	0	0	0	0	0	0	0	0	0	0	0	0	0	0	0	0	334230
P63104	14-3-3 protein zeta/delta	YWHAZ	0	0	0	0	0	0	0	46303	0	14594	707600	54441	379310	56926	0	172790	0	14842	0	9408.5	0	0	13105	0	18584	25187	40712	275750	4547100	4734400	16685	50387	26633	58742	31787	53757	53114	0	18999	0	0	46393	0	269350	31879	771600	499440
P63151	Serine/threonine-protein phosphatase 2A 55 kDa regulatory subunit B alpha isoform	PPP2R2A	0	0	0	0	0	0	0	0	0	0	0	0	0	0	0	0	0	0	0	0	0	0	0	0	0	0	0	0	20758	56728	0	0	0	0	0	0	0	0	0	0	0	0	0	0	0	0	0
P63167	Dynein light chain 1, cytoplasmic	DYNLL1	0	0	0	0	0	0	0	0	0	0	22198	0	0	0	0	0	0	0	0	0	0	0	0	0	0	0	35893	22894	64316	247380	0	0	0	0	0	0	0	0	0	0	0	0	0	0	0	0	0
P63220	Small ribosomal subunit protein eS21	RPS21	0	0	0	0	0	0	0	0	0	0	0	0	0	0	0	0	0	0	0	0	0	0	0	0	0	0	0	0	0	0	0	0	0	0	0	0	0	0	0	0	0	0	0	0	0	48123	0
P63241	Eukaryotic translation initiation factor 5A-1	EIF5A	0	0	0	0	0	0	0	0	0	0	0	0	0	0	0	21169	0	0	0	0	0	0	0	0	0	0	0	0	100730	119740	0	0	0	0	0	0	0	0	0	0	0	0	0	87929	0	0	41973
P63244	Small ribosomal subunit protein RACK1	RACK1	0	0	0	0	0	0	0	0	0	0	0	0	0	0	0	0	0	0	0	0	0	0	0	0	0	0	0	0	495670	950320	0	0	0	0	0	0	0	0	0	0	0	0	0	0	0	0	0
P63261	Actin, cytoplasmic 2	ACTG1	0	0	0	107260	65988	49143	230830	236590	423170	0	938480	260710	2760400	441130	0	1022500	79567	204870	54994	350440	464360	114130	1611400	3586100	733430	2955800	2615700	2620100	16917000	16797000	3192100	370930	374190	1430900	56420	1507000	1102100	55412	521630	0	0	39065	0	4909200	1369400	28023000	9814900
P63316	Troponin C, slow skeletal and cardiac muscles	TNNC1	0	0	0	0	0	0	0	0	0	0	0	0	0	0	0	168950	0	0	0	0	56091	0	0	0	0	0	0	0	0	0	0	0	0	0	80231	0	0	0	0	0	0	0	0	0	0	0	0
P67809	Y-box-binding protein 1	YBX1	0	0	0	0	0	0	0	0	0	0	0	0	0	0	0	0	0	0	0	0	0	0	0	0	0	0	0	0	0	0	0	0	0	0	0	0	0	0	0	0	0	0	0	50681	0	596030	0
P67870	Casein kinase II subunit beta	CSNK2B	0	0	0	0	0	0	0	0	0	0	0	0	0	0	0	0	0	0	0	0	0	0	0	0	0	0	0	0	0	11992	0	0	0	0	0	0	0	0	0	0	0	0	0	0	0	0	0
P67936	Tropomyosin alpha-4 chain	TPM4	0	0	0	0	0	0	0	0	0	0	0	0	0	0	0	0	0	0	0	0	0	0	0	0	0	0	0	0	1124100	101680	0	0	0	0	0	0	0	0	0	0	0	0	0	0	0	980080	0
P68104	Elongation factor 1-alpha 1	EEF1A1	0	0	28699	0	0	26777	148780	214570	89599	180250	685610	57799	633630	466180	0	400890	30429	107250	39125	58769	143810	93324	84058	0	238440	292200	186390	728410	6315300	7419700	85831	99504	173540	66966	483680	74609	160800	12482	17123	43020	46237	61718	0	1648700	492400	2545600	828880
P68133	Actin, alpha skeletal muscle;Actin, alpha skeletal muscle, intermediate form	ACTA1	0	0	0	0	0	0	24244	582770	0	78919	452490	81890	542040	0	0	45379000	0	0	0	0	249800	282060	0	388510	0	23180	0	816850	0	3109800	204350	155720	0	0	433470	0	104860	0	0	0	0	0	0	790950	82132	1323300	439810
P68363	Tubulin alpha-1B chain;Detyrosinated tubulin alpha-1B chain	TUBA1B	0	0	0	0	0	0	0	283810	0	62812	100300	0	138500	159650	0	195660	0	33608	0	26506	0	0	0	218140	242110	226510	28555	50876	8880800	6988000	259290	17295	24652	0	62604	152850	23634	0	41680	0	20472	0	0	1327000	435810	4112600	4487900
P68366	Tubulin alpha-4A chain	TUBA4A	0	0	0	0	0	0	0	0	0	0	0	0	0	0	0	33850	0	0	0	0	0	0	0	0	0	0	0	0	237220	130810	0	0	0	0	0	0	0	0	0	0	0	0	0	0	0	0	0
P68371	Tubulin beta-4B chain	TUBB4B	0	0	0	0	0	0	0	84705	0	0	92057	0	57196	0	0	377860	0	0	0	0	83085	47722	92389	469720	208410	246150	104960	209800	4083900	2234200	565540	74015	33380	0	272920	176680	0	0	6267.9	0	0	0	0	881750	148880	1005700	640190
P68871	Hemoglobin subunit beta	HBB	10743	0	357200	0	0	47276	35462	68713	25999	164630	123240	61360	286780	463440	0	3553300	0	55021	0	42931	2912400	1019100	1007600	7103900	29299000	6959900	2389000	405250	17011000	6306300	5871200	7242300	6514900	1512400	452940	21220000	854710	22671	0	51827	0	0	72660	77309000	67619000	269140000	200950000
P69892	Hemoglobin subunit gamma-2	HBG2	0	0	0	0	0	0	0	0	0	0	0	0	0	0	0	0	0	0	0	0	0	0	0	0	0	0	0	0	0	0	0	0	0	0	37406	0	0	0	0	0	0	0	0	0	149080	10383000	93296
P69905	Hemoglobin subunit alpha	HBA1	0	17349	1459700	0	44601	94143	167970	25619	714230	0	154970	41855	149130	60857	0	392470	0	94925	0	200410	3243000	2550700	744780	8864700	44620000	10254000	7553900	1647300	35345000	12635000	7884500	14388000	10436000	4283400	990030	37414000	781020	387720	36765	0	8075.5	0	166580	88309000	64894000	143620000	77012000
P78371	T-complex protein 1 subunit beta	CCT2	0	0	0	0	0	0	0	0	0	0	0	0	0	0	0	0	0	0	0	0	0	0	0	0	0	0	0	0	0	0	0	0	0	0	0	0	0	0	0	0	0	0	0	24033	55768	182280	72364
P78417	Glutathione S-transferase omega-1	GSTO1	0	0	0	0	0	0	0	0	0	0	0	0	0	0	0	0	0	0	0	0	0	0	0	0	0	0	0	0	24942	0	0	0	0	0	0	0	0	0	0	0	0	0	0	0	0	232050	27337
P78527	DNA-dependent protein kinase catalytic subunit	PRKDC	0	0	0	0	0	0	0	0	0	0	0	0	0	0	0	0	0	0	0	0	0	0	0	0	0	0	0	0	0	32612	0	0	0	0	0	0	0	0	0	0	0	0	0	0	0	0	0
P80188	Neutrophil gelatinase-associated lipocalin	LCN2	0	0	0	0	0	0	0	0	0	0	0	0	501390	0	0	0	0	0	0	0	0	0	0	0	0	36192	0	0	14121000	1691400	509450	0	0	0	0	0	0	0	0	0	0	0	0	0	0	0	0
P80511	Protein S100-A12	S100A12	0	0	0	0	0	0	0	0	0	0	0	0	41490	0	0	0	0	0	0	0	0	0	0	0	0	0	0	0	0	64743	0	0	0	0	0	0	0	0	0	0	0	0	0	0	0	0	0
P80723	Brain acid soluble protein 1	BASP1	0	0	0	0	0	0	0	0	0	0	0	0	0	0	0	0	0	0	0	0	0	0	0	0	0	0	0	0	0	0	0	0	0	0	0	0	0	0	0	0	0	0	0	0	0	113890	0
P81605	Dermcidin	DCD	567140	470290	0	1037600	236910	4283200	4859800	3496100	0	6103200	4699500	3049900	3787200	4923400	660470	3186600	2934400	5115200	2506000	3907800	2217600	4116600	7401600	2725500	4535800	6671300	5764000	8082300	9201300	3131700	3828600	5401300	6547400	6690000	3762200	5052600	3899400	2759700	2648400	1852800	855560	2451700	3931500	0	0	0	0
P83731	Large ribosomal subunit protein eL24	RPL24	0	0	0	0	0	0	0	0	0	0	0	0	0	0	0	0	0	0	0	0	0	0	0	45819	70874	0	0	0	0	0	0	0	0	0	52824	0	0	0	0	0	0	0	0	166450	0	0	0
P83916	Chromobox protein homolog 1	CBX1	0	0	0	0	0	0	0	0	0	0	0	0	0	0	0	0	0	0	0	0	0	0	0	0	0	0	0	0	0	0	0	0	0	0	0	0	0	0	0	0	0	0	0	0	0	62199	0
P84085	ADP-ribosylation factor 5	ARF5	0	0	0	0	0	0	0	0	0	0	0	0	0	0	0	0	0	0	0	0	0	0	0	0	0	0	0	0	39746	0	0	0	0	0	0	0	0	0	0	0	0	0	0	0	0	0	0
P84090	Enhancer of rudimentary homolog	ERH	0	0	0	0	0	0	0	0	0	0	0	0	0	0	0	0	0	0	0	0	0	0	0	0	0	0	0	0	0	40099	0	0	0	0	0	0	0	0	0	0	0	0	0	0	0	0	0
P84098	Large ribosomal subunit protein eL19	RPL19	0	0	0	0	0	0	0	0	0	0	0	0	0	0	0	0	0	0	0	0	0	0	0	0	0	0	0	0	0	94428	0	0	0	0	0	0	0	0	0	0	0	0	0	161840	0	0	0
P98082	Disabled homolog 2	DAB2	0	0	0	0	0	0	0	0	0	0	0	0	0	0	0	0	0	0	0	0	0	0	0	0	0	0	0	0	0	0	0	0	0	0	0	0	0	0	0	0	0	0	0	0	0	109310	0
P98095	Fibulin-2	FBLN2	0	0	0	0	0	0	0	0	0	0	0	0	0	0	0	0	0	0	0	0	0	0	0	0	0	108250	0	0	0	0	0	0	0	0	0	0	0	0	0	0	0	0	0	0	0	0	96712
P98160	Basement membrane-specific heparan sulfate proteoglycan core protein	HSPG2	0	0	0	0	0	0	0	0	0	0	0	0	0	0	0	0	0	0	0	0	0	15921	0	61435	130220	159720	0	0	72448	0	225840	0	0	0	224860	187150	0	0	0	0	0	0	0	222460	0	1883100	2729100
P99999	Cytochrome c	CYCS	0	0	0	0	0	0	0	0	0	0	0	0	0	0	0	0	0	0	0	0	22656	0	0	0	0	20730	0	0	579730	33395	0	0	0	0	0	0	0	0	0	0	0	0	0	12432	0	0	0
Q00325	Solute carrier family 25 member 3	SLC25A3	0	0	0	0	0	0	0	0	0	0	0	0	0	0	0	139730	0	0	0	0	79506	0	0	141320	110380	426690	0	0	159590	82580	69987	0	0	0	375830	0	0	0	0	0	0	0	0	191510	55902	0	115250
Q00341	Vigilin	HDLBP	0	0	0	0	0	0	0	0	0	0	0	0	0	0	0	0	0	0	0	0	0	0	0	0	0	0	0	0	0	0	0	0	0	0	0	0	0	0	0	0	0	0	0	0	0	247940	0
Q00610	Clathrin heavy chain 1	CLTC	0	0	0	0	0	0	0	0	0	0	0	0	0	0	0	0	0	0	0	0	0	0	0	0	0	88437	0	0	689980	460840	0	0	0	0	0	0	0	0	0	0	0	0	0	498230	141730	394650	126570
Q00765	Receptor expression-enhancing protein 5	REEP5	0	0	0	0	0	0	0	0	0	0	0	0	0	0	0	0	0	0	0	0	0	0	0	0	0	0	0	0	0	0	0	0	0	0	0	0	0	0	0	0	0	0	0	232330	0	56269	69967
Q00796	Sorbitol dehydrogenase	SORD	0	0	0	0	0	0	0	0	0	0	0	0	0	0	0	0	0	0	0	0	0	0	0	0	0	0	0	0	0	55075	0	0	0	0	0	0	0	0	0	0	0	0	0	0	0	0	0
Q00839	Heterogeneous nuclear ribonucleoprotein U	HNRNPU	0	0	0	0	0	0	0	0	0	0	0	0	0	0	0	0	0	0	0	0	0	0	0	0	0	0	0	0	0	0	0	0	0	0	0	0	0	0	0	0	0	0	0	153230	0	44563	41442
Q00872	Myosin-binding protein C, slow-type	MYBPC1	0	0	0	0	0	0	0	0	0	0	0	0	0	0	0	0	0	0	0	0	343800	359180	0	168270	0	202160	0	0	0	0	0	0	0	0	385990	0	0	0	0	0	0	0	0	0	0	0	0
Q01082	Spectrin beta chain, non-erythrocytic 1	SPTBN1	0	0	0	0	0	0	0	0	0	0	0	0	0	0	0	130800	0	0	0	0	0	0	0	356960	0	0	63089	0	66705	61267	378980	0	35831	0	0	55651	0	0	0	0	0	0	0	455180	90284	715960	2627500
Q01105	Protein SET	SET	0	0	0	0	0	0	0	0	0	0	0	0	0	0	0	0	0	0	0	0	0	0	0	0	0	0	0	0	123840	222820	0	0	0	0	0	0	0	0	0	0	0	0	0	0	0	0	0
Q01469	Fatty acid-binding protein 5	FABP5	181490	58089	321670	95863	135270	522620	1476400	4195700	215730	399990	905140	733970	3351800	3722400	297890	358930	320020	550660	701030	398180	701400	383100	1006500	342530	687800	376230	391220	2725900	4111500	8409200	1485400	589040	1443400	1331600	604430	165550	1005700	275220	349170	442350	181000	205150	339570	141590	50177	103970	0
Q01518	Adenylyl cyclase-associated protein 1	CAP1	0	0	0	0	0	0	0	0	0	0	0	0	0	0	0	0	0	0	0	0	0	0	0	0	0	0	0	0	213080	106660	0	0	0	0	0	0	0	0	0	0	0	0	0	134940	32788	198910	26263
Q01546	Keratin, type II cytoskeletal 2 oral	KRT76	0	0	27177	0	0	0	0	0	0	0	0	0	0	0	0	0	0	0	0	0	0	28670	0	0	0	0	0	0	0	0	0	0	0	0	0	297310	0	0	0	0	0	0	0	0	0	0	0
Q01581	Hydroxymethylglutaryl-CoA synthase, cytoplasmic	HMGCS1	0	0	0	0	0	0	0	0	0	0	0	0	0	0	0	0	0	0	0	0	0	0	0	0	0	0	0	0	0	44641	0	0	0	0	0	0	0	0	0	0	0	0	0	0	0	0	0
Q01995	Transgelin	TAGLN	0	0	0	0	0	0	0	0	0	0	0	0	0	0	0	0	0	0	0	0	0	0	0	0	0	0	0	0	0	0	0	0	0	0	0	0	0	0	0	0	0	0	0	0	0	1507800	711790
Q02045	Myosin light chain 5	MYL5	0	0	0	0	0	0	0	0	0	0	0	0	0	0	0	233030	0	0	0	0	0	0	0	0	0	0	0	0	0	0	0	0	0	0	0	0	0	0	0	0	0	0	0	0	0	0	0
Q02413	Desmoglein-1	DSG1	91810	236180	433060	378400	85468	11458000	20990000	14591000	528010	18886000	7663500	4454600	12181000	15591000	357550	5067000	5217000	8908600	10187000	2899500	3593300	5987500	7478800	5388600	5227200	6691500	17676000	22172000	7709000	16177000	6670800	8516100	8186500	7358300	3965200	6243100	18053000	2295700	6466400	4983700	1323200	2186600	4488700	0	88949	0	0
Q02817	Mucin-2	MUC2	0	0	0	0	0	0	0	0	0	0	0	0	0	0	0	0	0	0	0	0	0	0	0	0	0	0	0	0	0	0	0	0	0	0	0	0	0	0	0	0	0	0	0	0	0	3120800	0
Q02818	Nucleobindin-1	NUCB1	0	0	0	0	0	0	0	0	0	0	0	0	0	0	0	0	0	0	13482	0	0	0	0	0	0	0	0	0	0	0	0	0	0	0	0	0	0	0	0	0	0	0	0	0	0	0	0
Q02878	Large ribosomal subunit protein eL6	RPL6	0	0	0	0	0	0	0	0	0	0	0	0	0	0	0	0	0	0	0	0	0	0	0	21205	0	25004	0	0	22363	36363	19620	10772	0	0	0	8263.8	0	0	0	0	0	0	0	77011	0	161310	175150
Q02952	A-kinase anchor protein 12	AKAP12	0	0	0	0	0	0	0	0	0	0	0	0	0	0	0	0	0	0	0	0	0	0	0	0	0	0	0	0	0	0	0	0	0	0	0	0	0	0	0	0	0	0	0	156240	0	69597	0
Q02978	Mitochondrial 2-oxoglutarate/malate carrier protein	SLC25A11	0	0	0	0	0	0	0	0	0	0	0	0	0	0	0	0	0	0	0	0	0	0	0	0	0	56276	0	0	0	23389	57495	0	0	0	222040	0	0	0	0	0	0	0	0	0	0	31061	41163
Q03135	Caveolin-1	CAV1	0	0	0	0	0	0	0	0	0	0	0	0	0	0	0	0	0	0	0	0	0	0	0	0	0	0	0	0	0	0	0	0	0	0	0	0	0	0	0	0	0	0	0	553860	449000	362240	1804100
Q03252	Lamin-B2	LMNB2	0	0	0	0	0	0	0	0	0	0	0	0	0	0	0	0	0	0	0	0	0	0	0	64490	0	48248	0	79443	0	41797	60182	0	29290	0	0	0	0	0	0	0	0	0	0	100080	0	313900	319770
Q04118	Basic salivary proline-rich protein 3	PRB3	0	0	0	0	0	0	0	0	0	0	0	0	2105500	0	0	53882	0	0	0	0	0	0	0	0	0	0	0	0	0	0	0	0	0	0	0	0	0	0	0	0	0	0	0	0	0	0	0
Q04446	1,4-alpha-glucan-branching enzyme	GBE1	0	0	0	0	0	0	0	0	0	0	0	0	0	0	0	0	0	0	0	0	0	0	0	0	0	0	0	0	0	0	0	0	0	0	0	0	0	0	0	0	0	0	0	0	0	0	0
Q04837	Single-stranded DNA-binding protein, mitochondrial	SSBP1	0	0	0	0	0	0	0	0	0	0	0	0	0	0	0	0	0	0	0	0	0	0	0	0	0	0	0	0	0	0	0	0	0	0	0	0	0	0	0	0	0	0	0	0	0	0	0
Q05315	Galectin-10	CLC	0	0	0	0	0	0	0	0	0	0	0	0	0	0	0	0	0	0	0	0	0	0	0	0	0	0	0	0	0	0	0	0	0	0	0	0	0	0	0	0	0	0	0	0	0	47223	0
Q05469	Hormone-sensitive lipase	LIPE	0	0	0	0	0	0	0	0	0	0	0	0	0	0	0	0	0	0	0	0	0	0	0	0	0	0	0	0	0	0	0	0	0	0	0	0	0	0	0	0	0	0	0	0	0	0	41132
Q05639	Elongation factor 1-alpha 2	EEF1A2	0	0	0	0	0	0	0	0	0	0	0	0	0	0	0	253230	0	0	0	0	0	0	0	0	0	0	0	0	0	0	0	0	0	0	0	0	0	0	0	0	0	0	0	0	0	0	0
Q05682	Caldesmon	CALD1	0	0	0	0	0	0	0	0	0	0	0	0	0	0	0	0	0	0	0	0	0	0	0	0	0	0	0	0	0	0	0	0	0	0	0	0	0	0	0	0	0	0	0	446670	150070	451530	294400
Q05707	Collagen alpha-1(XIV) chain	COL14A1	0	0	10268	0	0	0	0	0	0	0	0	0	0	0	0	0	0	0	0	0	0	0	1510500	353610	428990	1136000	243860	33459	98783	0	0	290900	0	177090	157680	104340	0	0	0	0	0	0	0	24186000	3171900	23473000	8202600
Q06210	Glutamine--fructose-6-phosphate aminotransferase [isomerizing] 1	GFPT1	0	0	0	0	0	0	0	0	0	0	0	0	0	0	0	0	0	0	0	0	0	0	0	0	0	0	0	0	0	0	0	0	0	0	0	0	0	0	0	0	0	0	0	0	0	47520	0
Q06323	Proteasome activator complex subunit 1	PSME1	0	0	0	0	0	0	0	0	0	0	0	0	0	0	0	0	0	0	0	0	0	0	0	0	0	0	0	0	0	0	0	0	0	0	0	0	0	0	0	0	0	0	0	0	0	49241	0
Q06828	Fibromodulin	FMOD	0	0	0	0	0	0	0	0	0	0	0	0	0	0	0	0	0	0	0	0	0	0	0	0	0	0	0	0	0	0	0	0	0	0	73078	0	0	0	0	0	0	0	0	0	0	0	0
Q06830	Peroxiredoxin-1	PRDX1	0	0	89763	0	0	139010	810770	382440	155380	675250	543650	100430	850870	670940	0	436590	61168	194570	854270	31045	0	0	367590	220820	222370	393600	88564	1157000	4622700	1043100	457590	0	713910	367970	354870	0	1150500	67707	373070	38180	0	358630	0	650190	106330	1591800	502440
Q07020	Large ribosomal subunit protein eL18	RPL18	0	0	0	0	0	0	0	0	0	0	0	0	0	0	0	0	0	0	0	0	0	0	0	0	0	0	0	0	0	0	0	0	0	0	0	0	0	0	0	0	0	0	0	32020	13090	176660	0
Q07021	Complement component 1 Q subcomponent-binding protein, mitochondrial	C1QBP	0	0	0	0	0	0	0	0	0	0	0	0	0	0	0	0	0	0	0	0	0	0	0	0	0	0	0	0	14714	77620	0	0	0	0	0	0	0	0	0	0	0	0	0	0	0	0	0
Q07065	Cytoskeleton-associated protein 4	CKAP4	0	0	0	0	0	0	0	0	0	0	0	0	0	0	0	0	0	0	0	0	0	0	0	0	0	0	0	0	206030	120650	0	0	0	0	0	0	0	0	0	0	0	0	0	0	0	1611300	41837
Q07507	Dermatopontin	DPT	0	0	0	0	0	0	0	0	0	0	0	0	0	0	0	0	0	0	0	0	0	0	0	0	0	0	48280	97567	0	277030	0	0	0	0	0	541690	0	0	0	0	0	0	0	43910	0	347600	405100
Q07954	Prolow-density lipoprotein receptor-related protein 1	LRP1	0	0	0	0	0	0	0	0	0	0	0	0	0	0	0	0	0	0	0	0	0	0	0	0	0	0	0	0	0	0	0	0	0	0	0	0	0	0	0	0	0	0	0	0	0	48968	129990
Q07955	Serine/arginine-rich splicing factor 1	SRSF1	0	0	0	0	0	0	0	0	0	0	0	0	0	0	0	0	0	0	0	0	0	0	0	0	0	0	0	0	0	0	0	0	0	0	0	0	0	0	0	0	0	0	0	0	0	110830	0
Q07960	Rho GTPase-activating protein 1	ARHGAP1	0	0	0	0	0	0	0	0	0	0	0	0	0	0	0	0	0	0	0	0	0	0	0	0	0	0	0	0	0	0	0	0	0	0	0	0	0	0	0	0	0	0	0	0	0	105320	48255
Q08043	Alpha-actinin-3	ACTN3	0	0	0	0	0	0	0	27846	0	0	0	0	54967	0	0	27197000	0	0	0	0	331200	374970	0	371220	0	465710	0	0	400590	213600	0	0	0	0	1189400	0	0	0	0	0	0	0	0	46105	18553	283800	720890
Q08188	Protein-glutamine gamma-glutamyltransferase E	TGM3	27249	33913	244080	24675	0	1130300	1630700	1446600	121420	3266700	796270	378740	1709700	2317900	132320	138670	321160	1658600	1984200	259940	40754	842170	855670	59032	389410	227060	4281300	4685900	1860500	6390300	644400	1137700	1422700	1114100	528130	1113600	3279600	86547	193300	198710	80440	366460	83869	0	0	0	0
Q08211	ATP-dependent RNA helicase A	DHX9	0	0	0	0	0	0	0	0	0	0	0	0	0	0	0	0	0	0	0	0	0	0	0	444710	0	0	0	0	0	67229	0	0	0	0	0	0	0	0	0	0	0	0	0	0	0	0	0
Q08257	Quinone oxidoreductase	CRYZ	0	0	0	0	0	0	0	0	0	0	0	0	0	0	0	0	0	0	0	0	0	0	0	0	0	0	0	0	0	0	0	0	0	0	0	0	0	0	0	0	0	0	0	0	0	70095	32751
Q08431	Lactadherin;Lactadherin short form	MFGE8	0	0	0	0	0	0	0	0	0	0	0	0	0	0	0	0	0	0	544430	0	0	0	0	0	0	0	0	0	0	0	0	0	0	0	0	0	0	0	0	237380	0	0	0	0	0	0	0
Q08554	Desmocollin-1	DSC1	0	237320	0	0	0	3979700	6948700	3375300	125700	6097900	2805200	1566300	4586600	4836100	377020	2634200	2182700	3167100	3703500	1534800	1215900	2889800	2089800	2133400	1594600	2654900	7586300	9591500	1138600	5253000	2393200	3045900	3888900	3417300	1995100	2498700	8198500	1104500	2462800	2063400	647060	715570	1671200	0	132600	0	0
Q09666	Neuroblast differentiation-associated protein AHNAK	AHNAK	0	0	0	0	0	0	0	111890	0	72842	0	0	0	95014	0	0	0	0	0	0	0	0	0	0	0	0	14270	104440	3885500	919070	34811	0	0	0	0	0	0	0	0	0	0	0	0	363800	159830	5094900	7082700
Q12797	Aspartyl/asparaginyl beta-hydroxylase	ASPH	0	0	0	0	0	0	0	0	0	0	0	0	0	0	0	0	0	0	0	0	0	0	0	0	0	0	0	0	0	0	0	0	0	0	0	0	0	0	0	0	0	0	0	0	9830	525280	844520
Q12805	EGF-containing fibulin-like extracellular matrix protein 1	EFEMP1	0	0	0	0	0	0	0	0	0	0	0	0	0	0	0	0	0	0	0	0	0	0	42173	220550	0	0	247300	0	0	0	36531	0	0	0	0	0	0	0	0	0	0	0	0	0	0	0	45886
Q12873	Chromodomain-helicase-DNA-binding protein 3	CHD3	0	0	0	0	0	0	0	0	0	196600	0	125610	0	0	0	0	0	0	0	0	0	0	0	0	0	0	189990	253050	0	0	0	50978	0	36535	0	53024	0	0	0	0	0	0	0	0	0	0	0
Q12905	Interleukin enhancer-binding factor 2	ILF2	0	0	0	0	0	0	0	0	0	0	0	0	0	0	0	0	0	0	0	0	0	0	0	0	0	0	0	0	0	0	0	0	0	0	0	0	0	0	0	0	0	0	0	54194	0	0	0
Q12906	Interleukin enhancer-binding factor 3	ILF3	0	0	0	0	0	0	0	0	0	0	0	0	0	0	0	0	0	0	0	0	0	0	0	0	0	0	0	0	0	0	0	0	0	0	0	0	0	0	0	0	0	0	0	0	0	97786	30185
Q12931	Heat shock protein 75 kDa, mitochondrial	TRAP1	0	0	0	0	0	0	0	0	0	0	0	0	0	0	0	0	0	0	0	0	0	0	0	0	0	0	0	0	0	0	0	0	0	0	0	0	0	0	0	0	0	0	0	0	0	0	0
Q12965	Unconventional myosin-Ie	MYO1E	0	0	0	0	0	0	0	0	0	0	0	0	0	0	0	0	0	0	0	0	0	0	0	0	0	0	0	0	40255	20305	0	0	0	0	0	0	0	0	0	0	0	0	0	0	0	0	0
Q13011	Delta(3,5)-Delta(2,4)-dienoyl-CoA isomerase, mitochondrial	ECH1	0	0	0	0	0	0	0	0	0	0	0	0	0	0	0	0	0	0	0	0	0	0	0	0	0	0	0	0	0	0	0	0	0	0	0	0	0	0	0	0	0	0	0	217310	120980	0	76049
Q13200	26S proteasome non-ATPase regulatory subunit 2	PSMD2	0	0	0	0	0	0	0	0	0	0	0	0	0	0	0	0	0	0	0	0	0	0	0	0	0	0	0	0	0	0	0	0	0	0	0	0	0	0	0	0	0	0	0	0	0	0	0
Q13203	Myosin-binding protein H	MYBPH	0	0	0	0	0	0	0	0	0	0	0	0	0	0	0	432190	0	0	0	0	0	0	0	0	0	0	0	0	0	0	0	0	0	0	0	0	0	0	0	0	0	0	0	0	0	0	0
Q13228	Methanethiol oxidase	SELENBP1	0	0	0	0	0	0	0	0	0	0	0	0	0	0	0	0	0	0	0	0	0	0	0	0	0	0	0	0	0	0	0	0	0	0	0	0	0	0	0	0	0	0	0	602650	0	78177	286440
Q13263	Transcription intermediary factor 1-beta	TRIM28	0	0	0	0	0	0	0	0	0	0	0	0	0	0	0	0	0	0	0	0	0	0	0	0	0	0	0	0	0	0	0	0	0	0	0	0	0	0	0	0	0	0	0	56459	0	0	0
Q13326	Gamma-sarcoglycan	SGCG	0	0	0	0	0	0	0	0	0	0	0	0	0	0	0	0	0	0	0	0	0	0	0	0	0	0	0	0	0	0	0	0	0	0	32502	0	0	0	0	0	0	0	0	0	0	0	0
Q13347	Eukaryotic translation initiation factor 3 subunit I	EIF3I	0	0	0	0	0	0	0	0	0	0	0	0	0	0	0	0	0	0	0	0	0	0	0	0	0	0	0	0	0	0	0	0	0	0	0	0	0	0	0	0	0	0	0	26438	0	0	0
Q13409	Cytoplasmic dynein 1 intermediate chain 2	DYNC1I2	0	0	0	0	0	0	0	0	0	4980700	0	0	4588400	5412900	0	0	315810	0	2320900	0	0	0	0	0	0	849120	5038200	0	0	3838300	0	966800	0	0	0	0	0	0	0	0	0	0	0	0	0	0	0
Q13410	Butyrophilin subfamily 1 member A1	BTN1A1	0	0	0	0	0	0	0	0	0	0	0	0	0	0	0	0	0	0	78727	0	0	0	0	0	0	0	0	0	0	0	0	0	0	0	0	0	0	0	0	65494	0	0	0	0	0	0	0
Q13423	NAD(P) transhydrogenase, mitochondrial	NNT	0	0	0	0	0	0	0	0	0	0	0	0	0	0	0	0	0	0	0	0	0	0	0	0	0	0	0	0	0	0	0	0	0	0	0	0	0	0	0	0	0	0	0	0	0	0	25616
Q13509	Tubulin beta-3 chain	TUBB3	0	0	0	0	0	0	0	0	0	0	0	0	0	0	0	0	0	0	0	0	0	0	0	0	0	0	0	0	30205	11005	36982	0	0	0	0	0	0	0	0	0	0	0	0	0	0	0	0
Q13510	Acid ceramidase	ASAH1	0	0	0	0	0	0	89627	43706	0	578190	111940	56474	65326	103900	0	0	0	367210	102830	0	0	88707	60013	0	0	45567	179560	226530	277010	64557	60602	112780	20868	0	0	151010	0	32910	0	40893	0	0	0	0	0	0	0
Q13557	Calcium/calmodulin-dependent protein kinase type II subunit delta	CAMK2D	0	0	0	0	0	0	0	0	0	0	0	0	0	0	0	0	0	0	0	0	0	0	0	0	0	0	0	0	17193	0	0	0	0	0	0	0	0	0	0	0	0	0	0	28066	0	0	0
Q13576	Ras GTPase-activating-like protein IQGAP2	IQGAP2	0	0	0	0	0	0	0	0	0	0	0	0	0	0	0	0	0	0	0	0	0	0	0	0	0	0	0	0	0	0	0	0	0	0	0	0	0	0	0	0	0	0	0	0	0	0	48984
Q13642	Four and a half LIM domains protein 1	FHL1	0	0	0	0	0	0	0	0	0	0	0	0	0	0	0	44523	0	0	0	0	0	27218	0	44708	0	363120	0	0	0	0	0	0	0	0	115530	0	0	0	0	0	0	0	0	141240	87349	0	0
Q13683	Integrin alpha-7	ITGA7	0	0	0	0	0	0	0	0	0	0	0	0	0	0	0	0	0	0	0	0	0	0	0	0	0	0	0	0	0	0	111820	0	0	0	0	0	0	0	0	0	0	0	0	0	0	0	98293
Q13813	Spectrin alpha chain, non-erythrocytic 1	SPTAN1	0	0	0	0	0	0	0	0	0	0	0	0	0	0	0	0	0	0	0	0	0	0	0	42241	0	0	0	0	12610	32658	68058	0	0	0	0	0	0	0	0	0	0	0	0	14462	0	227730	2120500
Q13835	Plakophilin-1	PKP1	0	11499	0	142670	0	783940	803260	1634700	64686	1998300	1643300	700150	2400000	2333400	99612	635710	1389900	1574500	1663000	465950	354300	799260	404020	228160	97289	411830	1249700	3819400	9053800	2838700	1012400	620350	1118900	1108200	278720	217000	1791200	112080	455580	401430	114600	156200	187960	0	0	0	0
Q13867	Bleomycin hydrolase	BLMH	0	74755	292490	0	0	209970	160790	594990	174080	1674200	596110	416230	1195300	1450700	0	599440	631050	1617300	907840	269100	766130	246090	477390	47132	122690	759780	4192400	1058500	970470	5781000	1126600	915800	886510	215090	104160	480280	1125000	254600	434590	586330	115850	277310	322760	26025	0	0	0
Q13885	Tubulin beta-2A chain	TUBB2A	0	0	0	0	0	0	0	0	0	0	0	0	0	0	0	0	0	0	0	0	0	0	0	22312	0	15711	0	0	0	71486	85524	0	0	0	0	0	0	0	0	0	17136	0	0	0	0	0	0
Q14103	Heterogeneous nuclear ribonucleoprotein D0	HNRNPD	0	0	0	0	0	0	0	0	0	0	0	0	0	0	0	0	0	0	0	0	0	0	0	0	0	0	0	0	0	0	0	0	0	0	0	0	0	0	0	0	0	0	0	328320	93772	1667100	475030
Q14134	Tripartite motif-containing protein 29	TRIM29	0	0	0	0	0	0	0	0	0	0	0	0	0	0	0	0	0	0	0	0	0	0	0	0	0	0	0	0	152670	43856	0	0	0	0	0	0	0	0	0	0	0	0	0	0	0	0	0
Q14141	Septin-6	SEPTIN6	0	0	0	0	0	0	0	0	0	0	0	0	0	0	0	0	0	0	0	0	0	0	0	0	0	0	0	0	0	0	0	0	0	0	0	0	0	0	0	0	0	0	0	111550	0	0	0
Q14165	Malectin	MLEC	0	0	0	0	0	0	0	0	0	0	0	0	0	0	0	0	0	0	0	0	0	0	0	0	0	0	0	0	0	0	0	0	0	0	0	0	0	0	0	0	0	0	0	0	0	38589	0
Q14195	Dihydropyrimidinase-related protein 3	DPYSL3	0	0	0	0	0	0	0	0	0	0	0	0	0	0	0	0	0	0	0	0	0	0	0	0	0	0	0	0	0	0	0	0	0	0	0	0	0	0	0	0	0	0	0	1156400	70877	1490000	1136000
Q14203	Dynactin subunit 1	DCTN1	0	0	0	0	0	0	0	0	0	0	0	0	0	0	0	0	0	0	0	0	0	0	0	0	0	0	0	0	0	0	0	0	0	0	0	0	0	0	0	0	0	0	0	0	0	66046	0
Q14204	Cytoplasmic dynein 1 heavy chain 1	DYNC1H1	0	0	0	0	0	0	0	0	0	0	0	0	0	0	0	0	0	0	0	0	0	0	0	45409	0	0	0	0	147310	120120	0	0	0	0	0	0	0	0	0	0	0	0	0	0	0	320130	196800
Q14247	Src substrate cortactin	CTTN	0	0	0	0	0	0	0	0	0	0	0	0	0	0	0	0	0	0	0	0	0	0	0	0	0	0	0	0	0	0	0	0	0	0	0	0	0	0	0	0	0	0	0	76122	0	0	0
Q14254	Flotillin-2	FLOT2	0	0	0	0	0	0	0	0	0	0	0	0	0	0	0	0	0	0	0	0	0	0	0	0	0	0	0	0	0	0	0	0	0	0	0	0	0	0	0	0	0	0	0	72840	31543	0	0
Q14315	Filamin-C	FLNC	0	0	0	0	0	0	0	0	0	0	0	0	0	0	0	3415100	0	0	0	0	279960	86664	0	101560	0	109800	0	0	0	0	0	0	0	0	367510	0	0	0	0	0	0	0	0	118540	0	682550	76648
Q14324	Myosin-binding protein C, fast-type	MYBPC2	0	0	0	0	0	0	0	0	0	0	0	0	0	0	0	2797800	0	0	0	0	406890	28949	0	18690	0	249210	0	0	0	0	0	0	0	0	834270	0	0	0	0	0	0	0	0	0	0	0	0
Q14574	Desmocollin-3	DSC3	0	0	77056	0	0	186480	519730	198680	0	1093800	240340	67330	656190	592400	20718	157680	200910	551420	636240	55172	14720	17654	114870	0	169470	215440	921350	1031500	721130	590030	214640	461190	312740	149700	60365	130000	717340	98453	286050	118870	30008	0	138930	0	0	0	0
Q14624	Inter-alpha-trypsin inhibitor heavy chain H4	ITIH4	0	0	0	0	0	0	0	0	0	0	0	0	0	0	0	13395	0	0	0	0	0	0	0	0	0	0	0	0	21418	0	0	0	0	0	0	0	0	0	0	0	0	0	0	150250	85882	849020	343200
Q14697	Neutral alpha-glucosidase AB	GANAB	0	0	0	0	0	0	0	0	0	0	0	0	0	0	0	0	0	0	0	0	0	0	0	0	0	0	0	0	0	38657	0	0	0	0	0	0	0	0	0	0	0	0	0	0	0	1156900	301370
Q14764	Major vault protein	MVP	0	0	0	0	0	0	0	0	0	0	0	0	0	0	0	0	0	0	0	0	0	0	0	58420	0	0	0	0	0	0	23307	0	0	0	0	0	0	0	0	0	0	0	0	0	0	568750	0
Q14974	Importin subunit beta-1	KPNB1	0	0	0	0	0	0	0	0	0	0	0	0	0	0	0	0	0	0	0	0	0	0	0	0	0	0	0	0	0	64630	0	0	0	0	0	0	0	0	0	0	0	0	0	20242	0	0	0
Q14CX7	N-alpha-acetyltransferase 25, NatB auxiliary subunit	NAA25	0	0	0	0	0	0	0	0	0	0	0	0	0	0	0	0	0	0	0	0	0	74947	0	0	0	0	0	0	0	0	0	0	0	0	0	0	0	0	0	0	0	0	0	0	0	0	0
Q15008	26S proteasome non-ATPase regulatory subunit 6	PSMD6	0	0	0	0	0	0	0	0	0	0	0	0	0	0	0	0	0	0	0	0	0	0	0	0	0	0	0	0	32684	37914	0	0	0	0	0	0	0	0	0	0	0	0	0	0	0	0	0
Q15019	Septin-2	SEPTIN2	0	0	0	0	0	0	0	0	0	0	0	0	0	0	0	0	0	0	0	0	0	0	0	0	0	0	0	0	132350	0	0	0	0	0	0	0	0	0	0	0	0	0	0	46350	0	0	0
Q15046	Lysine--tRNA ligase	KARS1	0	0	0	0	0	0	0	0	0	0	0	0	0	0	0	0	0	0	0	0	0	0	0	0	0	0	0	0	0	0	0	0	0	0	0	0	0	0	0	0	0	0	0	132670	57677	0	0
Q15063	Periostin	POSTN	0	0	0	0	0	0	0	0	0	0	0	0	0	0	0	0	0	0	0	0	0	0	21005	59168	0	0	0	0	0	0	71083	0	0	0	274750	129670	0	0	0	0	0	0	0	98492	0	1665500	171780
Q15067	Peroxisomal acyl-coenzyme A oxidase 1	ACOX1	0	0	0	0	0	0	0	0	0	0	0	0	0	0	0	0	0	0	0	0	0	0	0	0	0	0	0	0	0	85497	0	0	0	0	0	0	0	0	0	0	0	0	0	0	0	0	0
Q15075	Early endosome antigen 1	EEA1	0	0	0	0	0	0	0	0	0	0	0	0	0	0	0	0	0	0	0	0	0	0	0	0	0	0	0	0	397050	0	0	0	0	0	0	0	0	0	0	0	0	0	0	0	0	49347	0
Q15084	Protein disulfide-isomerase A6	PDIA6	0	0	0	0	0	0	0	0	0	0	0	0	0	0	0	0	0	0	0	0	0	0	0	0	0	0	0	0	0	118390	14316	0	0	0	0	0	0	0	0	0	0	0	0	0	0	563960	0
Q15124	Phosphoglucomutase-like protein 5	PGM5	0	0	0	0	0	0	0	0	0	0	0	0	0	0	0	0	0	0	0	0	0	0	0	0	0	0	0	0	0	0	0	0	0	0	0	0	0	0	0	0	0	0	0	0	0	0	0
Q15149	Plectin	PLEC	0	0	0	0	0	0	0	16719	0	0	0	0	101070	43327	0	107520	0	47121	0	0	0	0	0	200440	0	75870	123990	142650	3370800	2394000	6719.4	0	0	58955	325290	0	0	0	0	0	0	0	0	127930	0	1317200	1101600
Q15181	Inorganic pyrophosphatase	PPA1	0	0	0	0	0	0	0	0	0	0	0	0	0	0	0	0	0	0	0	0	0	0	0	0	0	0	0	0	66073	0	0	0	0	0	0	0	0	0	0	0	0	0	0	0	0	0	0
Q15233	Non-POU domain-containing octamer-binding protein	NONO	0	0	0	0	0	0	0	0	0	0	0	0	0	0	0	0	0	0	0	0	0	0	0	0	0	0	0	0	91709	0	0	0	0	0	0	0	0	0	0	0	0	0	0	0	0	114910	0
Q15262	Receptor-type tyrosine-protein phosphatase kappa	PTPRK	0	0	0	0	0	0	0	0	0	0	0	0	95862	0	0	0	0	0	0	0	0	0	0	0	0	0	0	0	0	0	0	0	0	0	0	0	0	0	0	0	0	0	0	3056200	3348600	0	0
Q15363	Transmembrane emp24 domain-containing protein 2	TMED2	0	0	0	0	0	0	0	0	0	0	0	0	0	0	0	0	0	0	0	0	0	0	0	0	0	0	0	0	103930	0	0	0	0	0	0	0	0	0	0	0	0	0	0	0	0	176930	61555
Q15365	Poly(rC)-binding protein 1	PCBP1	0	0	0	0	0	0	0	0	0	0	0	0	0	0	0	0	0	0	0	0	0	0	0	60022	0	19770	0	0	0	143650	0	0	0	0	0	0	0	0	0	0	0	0	0	0	0	236310	0
Q15366	Poly(rC)-binding protein 2	PCBP2	0	0	0	0	0	0	0	0	0	0	0	0	0	0	0	0	0	0	0	0	0	0	0	0	0	0	0	0	0	42490	0	0	0	0	0	0	0	0	0	0	0	0	0	0	0	0	0
Q15392	Delta(24)-sterol reductase	DHCR24	0	0	0	0	0	0	0	0	0	0	0	0	0	0	0	0	0	0	0	0	0	0	0	0	0	0	0	0	103720	0	0	0	0	0	0	0	0	0	0	0	0	0	0	0	0	0	0
Q15431	Synaptonemal complex protein 1	SYCP1	0	0	0	0	0	0	0	0	0	0	0	0	0	0	0	0	0	0	0	0	0	0	0	0	0	0	0	0	0	0	0	0	0	0	0	0	0	383490	0	0	0	160340	0	0	0	0	0
Q15459	Splicing factor 3A subunit 1	SF3A1	0	0	0	0	0	0	0	0	0	0	0	0	0	0	0	0	0	0	0	0	0	0	0	0	0	0	0	0	0	0	0	0	0	0	0	0	0	0	0	0	0	0	0	0	0	22572	0
Q15517	Corneodesmosin	CDSN	0	0	33274	22533	0	1121800	4453500	2219100	0	3310000	1157600	125170	1896500	1473600	22929	1332600	455760	635980	1514000	214020	192510	354160	330500	1320200	265950	754670	1719100	1904200	101850	845010	1113700	421110	797140	1321300	411900	766310	3006500	111930	840530	658770	39294	0	465680	0	0	0	0
Q15582	Transforming growth factor-beta-induced protein ig-h3	TGFBI	0	0	0	0	0	0	0	0	0	0	0	0	0	0	0	0	0	0	0	0	0	0	0	452860	219570	269720	34452	0	0	144950	142630	254580	48717	46397	29582	71884	48482	0	0	0	0	0	0	776400	252140	119560	186050
Q15800	Methylsterol monooxygenase 1	MSMO1	0	0	0	0	0	0	0	0	0	0	0	0	0	0	0	0	0	0	0	0	0	0	0	0	0	0	0	0	66682	0	0	0	0	0	0	0	0	0	0	0	0	0	0	0	0	0	0
Q15828	Cystatin-M	CST6	0	0	0	0	0	0	48479	0	0	107220	0	0	0	0	0	0	0	82203	0	0	0	0	0	53813	0	0	0	0	1814200	0	0	0	0	0	0	0	0	0	0	0	0	0	0	0	0	0	0
Q15907	Ras-related protein Rab-11B	RAB11B	0	0	0	0	0	0	0	0	0	0	0	0	0	0	0	0	0	0	0	0	0	0	0	0	0	0	0	0	109320	64046	0	0	0	0	0	0	0	0	0	0	0	0	0	0	59585	201350	115570
Q16181	Septin-7	SEPTIN7	0	0	0	0	0	0	0	0	0	0	0	0	0	0	0	0	0	0	0	0	0	0	0	0	0	0	0	0	0	0	0	0	0	0	0	0	0	0	0	0	0	0	0	158640	0	32336	0
Q16363	Laminin subunit alpha-4	LAMA4	0	0	0	0	0	0	0	0	0	0	0	0	0	0	0	0	0	0	0	0	0	0	0	0	0	0	0	0	0	0	43204	0	0	0	0	0	0	0	0	0	0	0	0	0	90085	0	22555
Q16378	Proline-rich protein 4	PRR4	0	0	0	0	0	0	0	0	0	0	0	0	89770	0	0	0	0	0	0	0	0	0	0	0	0	0	0	0	0	0	0	0	0	0	0	0	0	0	0	0	0	0	0	0	0	0	0
Q16543	Hsp90 co-chaperone Cdc37	CDC37	0	0	0	0	0	0	0	0	0	0	0	0	0	0	0	0	0	0	0	0	0	0	0	0	0	0	0	0	0	0	0	0	0	0	0	0	0	0	0	0	0	0	0	94407	0	0	0
Q16555	Dihydropyrimidinase-related protein 2	DPYSL2	0	0	0	0	0	0	0	0	0	0	0	0	0	0	0	0	0	0	0	0	0	0	0	0	0	0	0	0	78468	0	0	0	0	0	0	0	0	0	0	0	0	0	0	504730	32302	456350	680270
Q16563	Synaptophysin-like protein 1	SYPL1	19939	0	0	0	0	0	0	0	0	0	0	0	0	0	0	0	0	0	0	0	0	0	0	0	163970	56477	0	0	375950	116780	88090	0	47728	0	0	48348	0	0	0	0	0	0	0	0	0	0	0
Q16610	Extracellular matrix protein 1	ECM1	0	0	0	14529	0	16332	231270	213710	0	120320	147610	52526	253450	149610	0	0	80896	189330	260790	0	52331	46391	87925	0	0	85676	0	467020	190230	385670	51034	124740	99592	88688	0	0	357420	0	51946	0	0	0	0	0	0	0	0
Q16630	Cleavage and polyadenylation specificity factor subunit 6	CPSF6	0	0	0	0	0	0	0	0	0	0	0	0	0	0	0	0	0	0	0	0	0	0	0	0	0	0	0	0	0	0	0	0	0	0	0	0	0	0	0	0	0	0	0	227510	0	0	0
Q16647	Prostacyclin synthase	PTGIS	0	0	0	0	0	0	0	0	0	0	0	0	0	0	0	0	0	0	0	0	0	0	0	0	0	0	0	0	0	0	0	0	0	0	0	0	0	0	0	0	0	0	0	0	0	606610	0
Q16658	Fascin	FSCN1	0	0	0	0	0	0	0	0	0	0	0	0	0	0	0	0	0	0	0	0	0	0	0	0	0	0	0	0	0	27373	0	0	0	0	0	0	0	0	0	0	0	0	0	0	0	347980	0
Q16698	2,4-dienoyl-CoA reductase [(3E)-enoyl-CoA-producing], mitochondrial	DECR1	0	0	0	0	0	0	0	0	0	0	0	0	0	0	0	0	0	0	0	0	0	0	0	0	0	0	0	0	61213	0	0	0	0	0	0	0	0	0	0	0	0	0	0	60811	23323	0	0
Q16762	Thiosulfate sulfurtransferase	TST	0	0	0	0	0	0	0	0	0	0	0	0	0	0	0	0	0	0	0	0	0	0	0	0	0	0	0	0	14527	0	0	0	0	0	0	0	0	0	0	0	0	0	0	56029	0	0	0
Q16836	Hydroxyacyl-coenzyme A dehydrogenase, mitochondrial	HADH	0	0	0	0	0	0	0	0	0	0	0	0	0	0	0	0	0	0	0	0	0	0	0	0	0	0	0	0	0	0	0	0	0	0	0	0	0	0	0	0	0	0	0	134120	79686	0	0
Q16851	UTP--glucose-1-phosphate uridylyltransferase	UGP2	0	0	0	0	0	0	0	0	0	0	0	0	0	0	0	0	0	0	0	0	0	0	0	0	0	0	0	0	0	0	0	0	0	0	0	0	0	0	0	0	0	0	0	181910	57803	0	24290
Q16853	Amine oxidase [copper-containing] 3	AOC3	679020	0	0	0	0	0	0	0	0	0	0	0	0	0	0	0	0	0	0	0	0	0	0	646310	327960	252710	1417500	32307	1791800	56873	4837900	690070	95959	437540	356580	1436900	114410	0	0	0	0	0	0	165550	66617	90818	4181000
Q16891	MICOS complex subunit MIC60	IMMT	0	0	0	0	0	0	0	0	0	0	0	0	0	0	0	0	0	0	0	0	0	0	0	0	0	0	0	0	0	0	0	0	0	0	0	0	0	0	0	0	0	0	0	0	0	0	0
Q17R55	Protein FAM187B	FAM187B	0	0	0	0	0	0	0	0	0	0	0	0	0	0	0	0	0	0	0	0	0	0	0	0	0	0	0	0	0	0	0	144150	0	0	0	0	0	0	0	0	0	0	0	0	0	0	0
Q1KMD3	Heterogeneous nuclear ribonucleoprotein U-like protein 2	HNRNPUL2	0	0	0	0	0	0	0	0	0	0	0	0	0	0	0	0	0	0	0	0	0	0	0	0	0	0	0	0	0	0	0	0	0	0	0	0	0	0	0	0	0	0	0	15655	0	0	0
Q2KHR2	DNA-binding protein RFX7	RFX7	0	0	0	0	0	0	0	0	0	0	0	291710	0	0	0	0	0	0	0	0	0	0	0	0	0	0	1234000	0	0	0	0	0	0	0	0	0	398900	0	0	0	146720	0	0	0	0	0	0
Q2TBA0	Kelch-like protein 40	KLHL40	0	0	0	0	0	0	0	0	0	0	0	0	0	0	0	0	0	0	0	0	0	0	0	0	0	0	0	0	0	0	0	0	0	0	45834	0	0	0	0	0	0	0	0	0	0	0	0
Q3LXA3	Triokinase/FMN cyclase	TKFC	0	0	0	0	0	0	0	0	0	0	0	0	0	0	0	0	0	0	0	0	0	0	0	0	0	0	0	0	0	0	0	0	0	0	0	0	0	0	0	0	0	0	0	0	0	46404	0
Q3ZCW2	Galectin-related protein	LGALSL	0	0	0	0	0	0	0	0	0	0	0	0	0	0	0	0	0	0	0	0	0	0	0	0	0	0	118600	0	0	115800	0	0	0	0	0	0	0	0	0	0	0	0	0	0	0	0	0
Q53GQ0	Very-long-chain 3-oxoacyl-CoA reductase	HSD17B12	0	0	0	0	0	0	0	0	0	0	0	0	0	0	0	0	0	0	0	0	0	0	0	0	0	0	0	0	19509	0	0	0	0	0	0	0	0	0	0	0	0	0	0	0	0	0	82822
Q53RT3	Retroviral-like aspartic protease 1	ASPRV1	0	0	0	0	0	17628	14029	0	10140	47071	0	0	78381	117760	0	0	0	0	0	0	0	26673	0	0	0	0	87787	0	598870	3876800	35133	20668	0	0	0	55030	81794	15665	0	0	0	27478	0	0	0	0	0
Q53TN4	Plasma membrane ascorbate-dependent reductase CYBRD1	CYBRD1	0	0	0	0	0	0	0	0	0	0	0	0	0	0	0	0	0	0	0	0	0	0	0	0	0	0	0	0	0	0	0	0	0	0	0	0	0	0	0	0	0	0	0	0	39634	0	0
Q562R1	Beta-actin-like protein 2	ACTBL2	0	0	0	0	0	0	0	0	0	0	0	0	0	0	0	0	0	0	0	0	0	0	0	0	0	0	0	0	0	0	0	0	0	73085	0	0	0	0	0	0	0	0	37675	0	8641.8	188520	212840
Q5JWF2	Guanine nucleotide-binding protein G(s) subunit alpha isoforms XLas	GNAS	0	0	0	0	0	0	0	0	0	0	0	0	0	0	0	0	0	0	0	0	0	0	0	0	0	0	0	0	0	0	0	0	0	0	0	0	0	0	0	0	0	0	0	0	0	77849	0
Q5SSJ5	Heterochromatin protein 1-binding protein 3	HP1BP3	0	0	0	0	0	0	0	0	0	0	0	0	0	0	0	0	0	0	0	0	0	0	0	0	0	0	0	0	0	0	0	0	0	0	0	0	0	0	0	0	0	0	0	122130	74600	64068	0
Q5T749	Keratinocyte proline-rich protein	KPRP	0	0	0	0	0	495310	211670	359860	0	2069200	663240	261500	501010	1279300	0	0	340100	704950	1052200	0	355270	0	210580	0	830070	0	2772400	3259700	1290900	746040	260930	0	107590	0	0	0	337940	0	0	304530	0	0	0	0	0	0	0
Q5T750	Protein KPLCE	KPLCE	0	0	0	0	0	138960	123790	0	0	151820	376910	319210	0	919470	0	0	0	731740	0	0	0	225680	417500	0	155520	333760	2023500	0	0	901990	365720	0	556160	0	0	0	667460	119390	233510	310180	0	0	0	0	0	0	0
Q5TEC6	Histone H3-7	H3-7	229030	663630	3168700	61522	0	0	0	0	314070	0	0	46557	579100	0	23414	0	40634	0	0	0	85507	414200	1417700	2924000	2070400	4234600	3813300	4453400	1556600	1055100	5345500	5640700	2977600	693960	4303700	3037400	865630	149930	242770	48880	271440	0	80798	781620	279600	613590	1541200
Q5VST9	Obscurin	OBSCN	0	0	0	0	0	0	0	0	0	0	0	0	0	0	0	38686	0	0	0	0	0	0	0	0	0	0	0	0	0	0	0	0	0	0	0	0	0	0	0	0	0	0	0	0	0	0	0
Q5VT79	Annexin A8-like protein 1	ANXA8L1	0	0	0	0	0	0	0	0	0	0	0	0	0	0	0	0	0	0	0	0	0	0	0	0	0	0	0	0	180000	143700	0	0	0	0	0	0	0	0	0	0	0	0	0	109000	0	0	29925
Q5VTT5	Myomesin-3	MYOM3	0	0	0	0	0	0	0	0	0	0	0	0	0	0	0	0	0	0	0	0	54777	16186	0	0	0	98140	0	0	0	0	0	0	0	0	173780	0	0	0	0	0	0	0	0	0	0	0	0
Q5VVQ6	Ubiquitin thioesterase OTU1	YOD1	0	0	0	0	0	0	0	0	0	0	0	0	0	0	0	0	0	0	0	0	0	0	0	0	0	0	0	0	46774	26720	0	0	0	0	0	0	0	0	0	0	0	0	0	0	0	0	0
Q5XKE5	Keratin, type II cytoskeletal 79	KRT79	0	0	0	0	0	0	0	0	0	0	0	0	0	0	0	0	0	0	0	0	0	0	0	0	0	0	0	0	588050	0	0	0	0	0	0	0	0	0	0	0	0	0	0	0	0	0	0
Q63HR2	Tensin-2	TNS2	0	0	0	0	0	0	0	0	0	0	0	0	0	0	0	0	0	0	0	0	0	0	0	0	0	0	0	0	0	0	80264	0	0	0	0	0	0	0	0	0	0	0	0	0	0	0	0
Q63ZY3	KN motif and ankyrin repeat domain-containing protein 2	KANK2	0	0	0	0	0	0	0	0	0	0	0	0	0	0	0	0	0	0	0	0	0	0	0	0	0	0	0	0	0	0	0	0	0	0	0	0	0	0	0	0	0	0	0	0	0	31222	0
Q6DD88	Atlastin-3	ATL3	0	0	0	0	0	0	0	0	0	0	0	0	0	0	0	0	0	0	0	0	0	0	0	0	0	0	0	0	0	0	0	0	0	0	0	0	0	0	0	0	0	0	0	69244	0	162960	43178
Q6IBS0	Twinfilin-2	TWF2	0	0	0	0	0	0	0	0	0	0	0	0	0	0	0	0	0	0	0	0	0	0	0	0	0	0	0	0	0	0	0	0	0	0	0	0	0	0	0	0	0	0	0	0	0	0	16311
Q6KF10	Growth/differentiation factor 6	GDF6	0	0	0	0	0	0	0	0	0	0	0	0	0	0	0	0	0	0	0	0	0	0	0	0	0	0	0	0	0	0	0	0	0	0	0	0	0	0	0	0	0	0	0	0	0	0	2247800
Q6NUJ1	Proactivator polypeptide-like 1	PSAPL1	0	0	0	0	0	0	0	0	0	0	0	0	0	0	0	0	0	0	0	0	0	0	0	0	0	0	85736	0	0	0	0	0	0	0	0	0	0	0	0	0	0	0	0	0	0	0	0
Q6NUM9	All-trans-retinol 13,14-reductase	RETSAT	0	0	0	0	0	0	0	0	0	0	0	0	0	0	0	0	0	0	0	0	0	0	0	0	0	0	0	0	0	0	34099	0	0	0	0	0	0	0	0	0	0	0	0	0	0	0	0
Q6NVY1	3-hydroxyisobutyryl-CoA hydrolase, mitochondrial	HIBCH	0	0	0	0	0	0	0	0	0	0	0	0	0	0	0	0	0	0	0	0	0	0	0	0	0	0	0	0	0	0	0	0	0	0	0	0	0	0	0	0	0	0	0	0	0	0	0
Q6NZI2	Caveolae-associated protein 1	CAVIN1	0	0	0	0	0	0	0	0	0	0	0	0	0	0	0	0	0	0	0	0	0	0	0	637970	422600	448690	403080	0	1101200	250450	1872600	703210	73755	267420	465560	532870	112930	0	0	0	0	0	0	1932100	557230	372580	4315000
Q6P1J6	Phospholipase B1, membrane-associated	PLB1	0	0	0	0	0	0	0	0	0	0	0	0	0	0	0	0	0	0	0	0	0	0	0	0	0	0	0	0	129490	0	0	0	0	0	0	0	0	0	0	0	0	0	0	0	0	0	0
Q6P4A8	Phospholipase B-like 1	PLBD1	0	0	0	0	0	46533	75252	66761	0	214080	29247	0	43091	37050	0	0	0	0	55459	0	0	0	0	0	0	0	0	142000	71048	173020	63040	0	0	0	0	0	73450	0	0	0	0	0	0	0	0	0	0
Q6P5S2	Protein LEG1 homolog	LEG1	0	0	0	0	0	0	0	0	0	0	0	0	63202	0	0	0	0	0	0	0	0	0	0	0	0	0	0	0	0	0	0	0	0	0	0	0	0	0	0	0	0	0	0	0	0	0	0
Q6UWP8	Suprabasin	SBSN	0	0	0	0	0	1463000	1774600	1139000	0	1767100	1305000	397110	789840	959910	0	535630	650600	983230	1002500	401060	425010	554300	633370	614680	389500	240870	4753600	3708700	810480	1194300	127110	136980	934710	574450	437630	572200	802960	252780	525220	497420	57854	154520	295910	0	0	0	0
Q6UWY5	Olfactomedin-like protein 1	OLFML1	0	0	0	0	0	0	0	0	0	0	0	0	0	0	0	0	0	0	0	0	0	0	0	176890	247140	58905	0	0	0	164820	0	149930	62670	0	30917	0	38519	0	0	0	0	0	0	760630	166550	28905	61666
Q6XQN6	Nicotinate phosphoribosyltransferase	NAPRT	0	0	0	0	0	0	0	0	0	0	0	0	0	0	0	0	0	0	0	0	0	0	0	0	0	0	0	0	0	71942	0	0	0	0	0	0	0	0	0	0	0	0	0	0	0	0	0
Q6YHK3	CD109 antigen	CD109	0	0	0	0	0	0	0	0	0	0	0	0	0	0	0	0	0	0	0	0	0	0	0	0	0	0	0	0	262930	0	0	0	0	0	0	0	0	0	0	0	0	0	0	0	0	0	0
Q6ZMU5	Tripartite motif-containing protein 72	TRIM72	0	0	0	0	0	0	0	0	0	0	0	0	0	0	0	16903	0	0	0	0	0	0	0	0	0	66577	0	0	0	0	0	0	0	0	168100	0	0	0	0	0	0	0	0	0	0	0	0
Q6ZNF0	Acid phosphatase type 7	ACP7	0	0	0	0	0	0	0	0	0	0	0	0	0	0	0	0	0	0	0	0	0	0	0	0	0	0	0	0	243980	159360	0	0	0	0	0	0	0	0	0	0	0	0	0	0	0	0	0
Q6ZRV2	Protein FAM83H	FAM83H	0	0	0	0	0	0	0	0	0	0	0	0	0	0	0	0	0	0	0	0	0	0	0	0	0	0	0	0	52937	39433	0	0	0	0	0	0	0	0	0	0	0	0	0	0	0	0	0
Q6ZV73	FYVE, RhoGEF and PH domain-containing protein 6	FGD6	0	0	0	0	0	0	0	0	0	1190100	133530	0	253250	719670	0	0	32779	192370	296770	0	29023	0	0	0	0	71187	507080	578930	0	717760	71208	123230	60778	85111	0	0	0	0	0	0	0	0	0	0	0	0	0
Q6ZVX7	F-box only protein 50	NCCRP1	0	0	0	0	0	263260	154770	486050	10262	744050	530190	248260	575950	792250	0	207230	332100	692990	476880	247210	57268	44650	47889	0	140830	48713	448360	1107000	2207000	2096700	362790	226110	348600	126240	101480	128930	326610	36279	177790	171410	54684	27022	98231	0	0	0	0
Q71U36	Tubulin alpha-1A chain	TUBA1A	0	0	0	0	0	0	0	0	0	0	0	0	0	0	0	0	0	0	0	0	0	0	0	0	0	0	0	0	65436	0	0	0	0	0	0	0	0	0	0	0	0	0	0	0	0	92237	0
Q7L2H7	Eukaryotic translation initiation factor 3 subunit M	EIF3M	0	0	0	0	0	0	0	0	0	0	0	0	0	0	0	0	0	0	0	0	0	0	0	0	0	0	0	0	0	0	0	0	0	0	0	0	0	0	0	0	0	0	0	0	0	173510	0
Q7L5L3	Lysophospholipase D GDPD3	GDPD3	0	0	0	0	0	0	0	0	0	35224	18808	0	27369	41130	0	0	0	0	0	0	0	0	0	0	0	0	0	0	474590	0	80504	13164	0	0	0	0	59076	0	0	0	0	0	0	0	0	0	0
Q7Z406	Myosin-14	MYH14	0	0	0	0	0	0	0	7710.7	0	0	0	0	0	23470	0	0	0	0	0	0	0	0	0	0	0	0	0	0	3979600	451590	0	0	0	0	0	0	0	0	0	0	0	0	0	109390	0	0	0
Q7Z4W1	L-xylulose reductase	DCXR	0	0	0	0	0	0	0	0	0	27642	0	0	0	0	0	0	0	0	0	0	0	0	0	0	0	0	0	0	0	0	0	0	0	0	0	0	0	0	0	0	0	0	0	0	0	0	0
Q7Z5J4	Retinoic acid-induced protein 1	RAI1	0	0	0	0	0	110130	0	0	0	182820	0	0	0	0	0	0	0	0	0	0	0	0	0	36898	0	0	0	441180	0	0	0	0	306250	0	0	0	0	0	0	0	0	0	0	0	0	0	0
Q7Z5L7	Podocan	PODN	0	0	0	0	0	0	0	0	0	0	0	0	0	0	0	0	0	0	0	0	0	0	0	0	0	0	0	0	0	0	0	0	0	0	0	0	0	0	0	0	0	0	0	0	0	0	206300
Q7Z7G0	Target of Nesh-SH3	ABI3BP	0	0	0	0	0	0	0	0	0	0	0	0	0	0	0	0	0	0	0	0	0	0	0	0	0	0	0	0	0	0	0	0	0	0	0	0	0	0	0	0	0	0	0	0	116470	0	61514
Q86SG5	Protein S100-A7A	S100A7A	0	0	0	0	0	0	0	0	0	0	0	0	0	0	0	0	0	0	0	0	0	0	0	0	0	0	0	0	1550600	2020600	0	0	0	0	0	0	0	0	0	0	0	0	0	0	0	0	0
Q86TD4	Sarcalumenin	SRL	0	0	0	0	0	0	0	0	0	0	0	0	0	0	0	733860	0	0	0	0	0	0	0	0	0	0	0	0	0	0	0	0	0	0	0	0	0	0	0	0	0	0	0	0	0	0	0
Q86U44	N6-adenosine-methyltransferase catalytic subunit	METTL3	0	0	0	0	0	0	0	0	0	0	0	0	0	5348400	0	0	0	0	0	0	0	0	0	0	0	0	0	0	0	0	0	0	0	0	0	0	0	846480	0	0	0	0	0	0	0	0	0
Q86UE4	Protein LYRIC	MTDH	0	0	0	0	0	0	0	0	0	0	0	0	0	0	0	0	0	0	0	0	0	0	0	0	0	0	0	0	0	0	0	0	0	0	0	0	0	0	0	0	0	0	0	23512	0	37241	0
Q86UP2	Kinectin	KTN1	0	0	0	0	0	0	0	0	0	0	0	0	0	0	0	0	0	0	0	0	0	0	0	0	0	0	0	0	0	0	0	0	0	0	0	0	0	0	0	0	0	0	0	0	0	86932	0
Q86UP3	Zinc finger homeobox protein 4	ZFHX4	0	0	0	0	0	0	0	0	0	0	0	0	0	0	0	0	0	0	0	0	0	0	0	0	0	0	0	0	538930	0	0	0	0	0	0	0	0	0	0	0	0	0	0	0	0	0	0
Q86UX7	Fermitin family homolog 3	FERMT3	0	0	0	0	0	21251	176010	0	0	168810	385210	331380	0	504130	0	188480	0	0	0	0	139580	0	0	0	0	0	0	0	0	0	0	0	0	0	0	0	0	0	173250	0	75089	67769	0	0	0	270280	233600
Q86VF7	Nebulin-related-anchoring protein	NRAP	0	0	0	0	0	0	0	0	0	0	0	0	0	0	0	168990	0	0	0	0	0	0	0	0	0	0	0	0	0	0	0	0	0	0	0	0	0	0	0	0	0	0	0	0	0	0	0
Q86VP6	Cullin-associated NEDD8-dissociated protein 1	CAND1	0	0	0	0	0	0	0	0	0	0	0	0	0	0	0	0	0	0	0	0	0	0	0	0	0	0	0	0	0	0	0	0	0	0	0	0	0	0	0	0	0	0	0	196220	24612	0	24212
Q86XP0	Cytosolic phospholipase A2 delta	PLA2G4D	0	0	0	0	0	0	0	0	0	0	0	0	0	0	0	0	0	0	0	0	0	0	0	0	0	0	0	0	0	82680	0	0	0	0	0	0	0	0	0	0	0	0	0	0	0	0	0
Q86Z14	Beta-klotho	KLB	0	0	0	0	0	855600	0	676620	0	0	0	0	0	1554100	0	0	0	0	0	1944500	0	0	1406900	0	0	0	0	0	1963400	0	0	0	0	0	0	0	1955800	0	0	0	0	2774300	2947600	0	0	0	0
Q8IUL8	Cartilage intermediate layer protein 2	CILP2	0	0	0	0	0	0	0	0	0	0	0	0	0	0	0	0	0	0	0	0	0	0	0	0	0	0	0	0	0	0	0	0	0	0	69519	0	0	0	0	0	0	0	0	0	0	0	0
Q8IUX7	Adipocyte enhancer-binding protein 1	AEBP1	0	0	0	0	0	0	0	0	0	0	0	0	0	0	0	0	0	0	0	0	0	0	0	0	0	0	0	0	0	0	0	0	0	0	0	0	0	0	0	0	0	0	0	0	0	104800	34183
Q8IV08	5-3 exonuclease PLD3	PLD3	0	0	0	0	0	0	0	0	0	0	0	0	0	0	0	0	0	0	0	0	0	0	0	0	0	0	0	0	1042000	134690	0	0	0	0	0	0	0	0	0	0	0	0	0	0	0	0	0
Q8IW75	Serpin A12	SERPINA12	0	0	0	0	0	67062	145930	10676	0	117340	40183	19221	0	80874	0	0	24446	152740	171110	0	0	0	0	0	0	18358	180640	154670	371530	230890	0	24624	53286	16106	0	0	225020	0	22944	0	0	0	0	0	0	0	0
Q8IYT4	Katanin p60 ATPase-containing subunit A-like 2	KATNAL2	0	0	0	0	0	0	0	0	0	0	0	0	0	0	0	0	0	0	0	0	0	0	0	0	0	0	0	0	0	102580	0	0	0	0	0	0	0	0	0	0	0	0	0	0	0	0	0
Q8N142	Adenylosuccinate synthetase isozyme 1	ADSS1	0	0	0	0	0	0	0	0	0	0	0	0	0	0	0	92301	0	0	0	0	0	0	0	0	0	0	0	0	0	0	0	0	0	0	0	0	0	0	0	0	0	0	0	0	0	0	0
Q8N3Y7	Epidermal retinol dehydrogenase 2	SDR16C5	0	0	0	0	0	0	0	0	0	0	0	0	0	0	0	0	0	0	0	0	0	0	0	0	0	0	0	0	0	29964	0	0	0	0	0	0	0	0	0	0	0	0	0	0	0	0	0
Q8N4B1	Sesquipedalian-1	PHETA1	0	0	0	0	0	0	0	0	0	0	120320	0	0	364690	0	0	0	0	0	72358	0	0	40363	0	0	0	207340	0	0	56004	0	0	0	0	0	0	0	0	0	0	0	0	0	0	0	0	0
Q8NBX0	Saccharopine dehydrogenase-like oxidoreductase	SCCPDH	0	0	0	0	0	0	0	0	0	0	0	0	0	0	0	0	0	0	0	0	0	0	0	0	0	0	0	0	0	0	0	0	0	0	0	0	0	0	0	0	0	0	0	78018	53250	0	0
Q8NE71	ATP-binding cassette sub-family F member 1	ABCF1	0	0	0	0	0	0	0	0	0	0	0	0	0	0	0	0	0	0	0	0	0	0	0	0	0	0	0	0	0	40275	0	0	0	0	0	0	0	0	0	0	0	0	0	0	0	52825	0
Q8NEX9	Short-chain dehydrogenase/reductase family 9C member 7	SDR9C7	0	0	0	0	0	0	10437	0	0	73667	0	0	16734	19869	0	0	0	0	0	0	0	0	0	0	0	0	0	37870	44050	80938	0	0	0	0	0	0	0	0	0	0	0	0	0	0	0	0	0
Q8NHP8	Putative phospholipase B-like 2	PLBD2	0	0	0	0	0	0	0	0	0	0	0	0	0	0	0	0	0	0	0	0	0	0	0	0	0	0	0	0	61240	0	0	0	0	0	0	0	0	0	0	0	0	0	0	0	0	0	0
Q8TCJ2	Dolichyl-diphosphooligosaccharide--protein glycosyltransferase subunit STT3B	STT3B	0	0	0	0	0	0	0	0	0	0	0	0	0	0	0	0	0	0	0	0	0	0	0	0	0	0	0	0	0	45503	0	0	0	0	0	0	0	0	0	0	0	0	0	0	0	0	0
Q8TCT9	Minor histocompatibility antigen H13	HM13	0	0	0	0	0	0	0	0	0	0	0	0	0	0	0	0	0	0	0	0	0	0	0	0	0	0	0	0	74498	0	0	0	0	0	0	0	0	0	0	0	0	0	0	0	0	0	0
Q8TDL5	BPI fold-containing family B member 1	BPIFB1	0	0	0	0	0	0	0	0	0	0	0	0	1351600	0	0	0	0	0	0	0	0	0	0	0	0	0	0	0	0	0	0	0	0	0	0	0	0	0	0	0	0	0	0	0	0	0	0
Q8TE68	Epidermal growth factor receptor kinase substrate 8-like protein 1	EPS8L1	0	0	0	0	0	0	0	0	0	0	0	0	0	0	0	0	0	0	0	0	0	0	0	0	0	0	0	0	17115	34498	0	0	0	0	0	0	0	0	0	0	0	0	0	0	0	0	0
Q8TEA8	D-aminoacyl-tRNA deacylase 1	DTD1	0	0	0	0	0	0	0	0	0	0	0	0	0	0	0	0	0	0	0	0	0	0	0	0	0	0	0	0	13104	0	0	0	0	0	0	0	0	0	0	0	0	0	0	0	0	0	0
Q8TF72	Protein Shroom3	SHROOM3	0	0	1000900	1095100	0	2626300	0	2185400	814470	332980	1035200	2216800	130370	2643200	0	0	3352200	3311600	2077700	0	2110300	5420200	4639900	0	1109900	0	13186000	6696600	0	0	4515000	0	2599600	0	0	985610	0	0	2365700	1956000	0	0	2199300	0	0	0	0
Q8WUH6	Transmembrane protein 263	TMEM263	0	0	0	0	0	0	0	0	0	0	0	0	0	0	0	0	0	0	0	0	0	0	0	0	0	0	0	0	0	0	0	0	0	0	0	0	0	0	0	0	0	0	0	0	0	43351	0
Q8WUM4	Programmed cell death 6-interacting protein	PDCD6IP	0	0	0	0	0	0	0	0	0	0	0	0	0	0	0	0	0	0	0	0	0	0	0	0	0	0	0	0	299160	51286	0	0	0	0	0	0	0	0	0	0	0	0	0	0	0	0	0
Q8WVV4	Protein POF1B	POF1B	0	32892	0	0	0	107940	293810	706380	34431	830830	567690	176090	667040	1009100	0	255940	323250	731900	671260	36201	248450	125980	250250	0	242530	160450	511300	1840100	8230300	8648200	357590	117880	220360	225020	97508	202120	677170	22806	62515	228070	20752	97573	40792	0	0	0	0
Q8WWA1	Transmembrane protein 40	TMEM40	0	0	0	0	0	0	0	0	0	0	0	0	0	0	0	0	0	0	0	0	0	0	0	0	0	0	0	0	744170	0	0	0	0	0	0	0	0	0	0	0	0	0	0	0	0	0	0
Q9UNL4	Inhibitor of growth protein 4	ING4	0	0	0	0	0	2203300	2627000	3414400	75369	2214500	2455900	886990	5635000	3847600	460940	446330	655620	0	986600	357530	0	2154800	1704200	806830	0	1937300	10650000	10775000	0	2493700	2532800	3181300	5781700	3412200	981000	1907500	6209700	153500	269200	290150	106190	0	0	0	0	0	0
Q8WZ42	Titin	TTN	0	0	0	0	0	0	0	0	0	0	0	0	0	0	0	58957000	0	0	0	0	5235200	1567400	0	485290	0	1416000	0	0	0	0	0	0	0	0	4020300	0	0	0	0	0	0	0	0	0	0	0	0
Q92522	Histone H1.10	H1-10	0	0	0	0	0	0	0	0	0	0	0	0	0	0	0	0	0	0	0	0	0	0	0	0	87719	0	0	0	0	0	26575	21596	24191	0	0	0	0	0	0	0	0	0	0	132590	0	186430	271710
Q92542	Nicastrin	NCSTN	0	0	0	0	0	0	0	0	0	0	0	0	0	0	0	0	0	0	0	0	0	0	0	0	0	0	0	0	247900	0	0	0	0	0	0	0	0	0	0	0	0	0	0	0	0	0	0
Q92614	Unconventional myosin-XVIIIa	MYO18A	0	0	0	0	0	0	0	0	0	0	0	0	0	0	0	0	0	0	0	0	0	0	0	0	0	0	0	0	104640	0	0	0	0	0	0	0	0	0	0	0	0	0	0	0	0	0	0
Q92817	Envoplakin	EVPL	0	0	0	0	0	0	0	0	0	0	109560	0	0	0	0	0	0	0	0	0	0	0	0	0	0	0	0	0	557830	72416	0	0	0	0	0	0	0	0	0	0	0	0	0	0	0	0	0
Q92820	Gamma-glutamyl hydrolase	GGH	0	32075	0	0	0	56440	140560	97348	0	150360	0	0	233180	313910	0	0	0	133150	0	0	89547	58398	49888	0	11185	27878	323330	0	123620	161720	65496	100380	59129	59422	49707	0	339510	0	76372	57128	0	0	0	0	0	0	0
Q92841	Probable ATP-dependent RNA helicase DDX17	DDX17	0	0	0	0	0	0	0	0	0	0	0	0	0	0	0	0	0	0	0	0	0	0	0	0	0	0	0	0	33445	117600	0	0	0	0	0	0	0	0	0	0	0	0	0	47031	0	103890	0
Q92874	Deoxyribonuclease-1-like 2	DNASE1L2	0	0	0	0	0	0	0	0	0	0	0	0	0	0	0	0	0	0	0	0	0	0	0	0	0	0	0	0	229580	152830	0	0	0	0	0	0	0	0	0	0	0	0	0	0	0	0	0
Q92876	Kallikrein-6	KLK6	0	0	0	0	0	0	0	0	0	0	0	0	0	0	0	0	0	0	0	0	0	0	0	0	0	0	0	0	375190	132190	0	0	0	0	0	0	0	0	0	0	0	0	0	0	0	0	0
Q93050	V-type proton ATPase 116 kDa subunit a 1	ATP6V0A1	0	0	0	0	0	0	0	0	0	0	0	0	0	0	0	0	0	0	0	0	0	0	0	0	0	0	0	0	54409	13218	0	0	0	0	0	0	0	0	0	0	0	0	0	0	0	0	0
Q93084	Sarcoplasmic/endoplasmic reticulum calcium ATPase 3	ATP2A3	0	0	0	0	0	0	0	0	0	0	0	0	0	0	0	690090	0	0	0	0	0	0	0	0	0	0	0	0	0	0	0	0	0	0	0	0	0	0	0	0	0	0	0	0	0	0	0
Q969X1	Protein lifeguard 3	TMBIM1	0	0	0	0	0	0	0	0	0	0	0	0	0	0	0	0	0	0	0	0	0	0	0	0	0	0	0	0	70482	0	0	0	0	0	0	0	0	0	0	0	0	0	0	0	0	0	0
Q96A32	Myosin regulatory light chain 11	MYL11	0	0	0	0	0	0	0	0	0	0	0	0	0	0	0	11821000	0	0	0	0	0	179190	0	0	0	15712	0	0	0	0	0	0	0	0	257800	0	0	0	0	0	0	0	0	0	0	0	0
Q96AG4	Leucine-rich repeat-containing protein 59	LRRC59	0	0	0	0	0	0	0	0	0	0	0	0	0	0	0	0	0	0	0	0	0	0	0	0	0	0	0	0	6349.6	62025	0	0	0	0	0	0	0	0	0	0	0	0	0	0	0	0	0
Q96B21	Transmembrane protein 45B	TMEM45B	0	0	0	0	0	0	0	0	0	0	0	0	0	0	0	0	0	0	0	0	0	0	0	0	0	0	0	0	72195	0	0	0	0	0	0	0	0	0	0	0	0	0	0	0	0	0	0
Q96CW1	AP-2 complex subunit mu	AP2M1	0	0	0	0	0	0	0	0	0	0	0	0	0	0	0	0	0	0	0	0	0	0	0	0	0	0	0	0	0	0	0	0	0	0	0	0	0	0	0	0	0	0	0	89432	0	48827	0
Q96CX2	BTB/POZ domain-containing protein KCTD12	KCTD12	0	0	0	0	0	0	0	0	0	0	0	0	0	0	0	0	0	0	0	0	0	0	0	0	0	0	0	0	0	0	0	0	0	0	0	0	0	0	0	0	0	0	0	0	0	360800	135180
Q96D15	Reticulocalbin-3	RCN3	0	0	0	0	0	0	0	0	0	0	0	0	0	0	0	0	0	0	0	0	0	0	0	0	0	0	0	0	0	0	0	0	0	0	0	0	0	0	0	0	0	0	0	0	0	215660	0
Q96DA0	Pancreatic adenocarcinoma up-regulated factor	ZG16B	0	0	0	0	0	0	0	0	0	0	0	0	2208500	0	0	68694	0	0	0	44351	0	0	0	0	0	0	0	411520	0	0	100230	0	0	0	0	0	0	0	0	0	0	0	0	0	0	0	0
Q96DR8	Mucin-like protein 1	MUCL1	0	0	0	0	0	0	0	0	0	0	0	0	0	0	0	0	0	2215000	0	0	0	0	0	0	0	0	0	0	0	0	0	0	0	0	0	0	0	0	0	0	0	0	0	0	0	0	0
Q96FQ6	Protein S100-A16	S100A16	0	0	0	0	0	0	103740	127320	0	224950	68894	0	88258	119130	0	0	0	30039	0	0	44160	33377	36855	0	0	0	64665	223920	1112000	263900	103300	0	46581	0	0	55091	0	0	0	23467	0	20209	0	0	0	0	0
Q96FW1	Ubiquitin thioesterase OTUB1	OTUB1	0	0	0	0	0	0	0	0	0	0	0	0	0	0	0	0	0	0	0	0	0	0	0	0	0	0	0	0	56309	0	0	0	0	0	0	0	0	0	0	0	0	0	0	0	0	34266	0
Q96FX8	p53 apoptosis effector related to PMP-22	PERP	0	0	0	0	0	57923	35263	16041	0	231170	122170	24071	136430	170410	0	0	90015	115180	78709	23059	46801	0	0	32261	0	0	0	157590	0	148890	0	0	0	18554	0	48250	100720	0	0	0	0	0	0	0	0	0	0
Q96G03	Phosphopentomutase	PGM2	0	0	0	0	0	0	0	0	0	0	0	0	0	0	0	0	0	0	0	0	0	0	0	0	0	0	0	0	0	167990	0	0	0	0	0	0	0	0	0	0	0	0	0	0	0	0	0
Q96I99	Succinate--CoA ligase [GDP-forming] subunit beta, mitochondrial	SUCLG2	0	0	0	0	0	0	0	0	0	0	0	0	0	0	0	0	0	0	0	0	0	0	0	0	0	0	0	0	0	0	0	0	0	0	0	0	0	0	0	0	0	0	0	0	0	0	96067
Q96IY4	Carboxypeptidase B2	CPB2	0	0	0	0	0	0	0	0	0	0	0	0	0	0	0	0	0	0	0	0	0	0	0	0	0	725090	0	0	0	0	0	0	0	0	0	0	0	0	0	0	0	0	0	0	0	0	110790
Q96KP4	Cytosolic non-specific dipeptidase	CNDP2	0	0	0	0	0	0	0	0	0	0	0	0	0	0	0	0	0	0	0	0	0	0	0	0	0	0	0	0	0	0	0	0	0	0	0	0	0	0	0	0	0	0	0	54677	15175	126680	42734
Q96L46	Calpain small subunit 2	CAPNS2	0	0	0	0	0	0	0	0	0	0	0	38131	0	0	0	0	0	0	0	0	0	0	0	0	0	0	0	0	732430	0	0	30991	34990	0	0	0	37002	0	0	0	0	0	0	0	0	0	0
Q96N23	Cilia- and flagella-associated protein 54	CFAP54	0	0	0	0	0	0	0	0	0	0	0	0	0	0	0	0	0	0	0	0	0	0	0	0	0	0	0	0	1111600	49723	0	0	0	0	21978	0	0	0	0	0	0	0	0	0	0	0	0
Q96P63	Serpin B12	SERPINB12	268000	111090	1669900	387870	0	549900	1873900	924980	964940	5446800	2648200	1078600	3210500	3909000	224430	767390	1012000	1801900	1472800	713110	997900	1243300	1915500	951320	645120	2103400	4612400	3982300	839020	5451900	1900900	1678300	2703600	1465500	1075700	1640800	5185700	372350	1356700	847200	289110	695170	399810	0	0	0	0
Q96Q06	Perilipin-4	PLIN4	25408	0	0	0	0	0	0	0	0	0	0	0	0	0	0	0	0	0	0	0	0	0	0	0	0	0	0	0	150880	0	620590	0	0	0	0	0	0	0	0	0	0	0	0	232580	234270	0	4261500
Q96Q89	Kinesin-like protein KIF20B	KIF20B	0	0	0	0	0	1057400	1426200	1582900	5715900	7343600	0	7950000	6709600	0	0	6852500	0	0	0	6510600	5531700	0	0	0	0	21897000	19999000	15801000	0	15736000	22816000	19847000	0	23881000	18342000	0	539100	0	0	7506500	0	7049000	11055000	0	0	0	0
Q96QA5	Gasdermin-A	GSDMA	21600	0	126020	34011	0	168370	118880	142190	0	908610	163000	22184	92757	1000200	15243	140870	63631	912900	512790	33272	104370	98053	24641	0	99158	90791	569360	92790	2693000	956550	141750	31341	91689	306350	92032	208600	267270	86194	13330	218610	0	32550	0	0	0	0	0
Q96QK1	Vacuolar protein sorting-associated protein 35	VPS35	0	0	0	0	0	0	0	0	0	0	0	0	0	0	0	0	0	0	0	0	0	0	0	0	0	0	0	0	71737	29213	0	0	0	0	0	0	0	0	0	0	0	0	0	0	33436	199690	0
Q96S65	Cysteine/serine-rich nuclear protein 1	CSRNP1	0	0	0	0	0	0	0	0	0	0	0	0	0	0	0	0	0	0	429650	0	0	0	0	0	0	0	0	0	0	0	0	0	0	0	0	0	0	0	0	220370	0	0	0	0	0	0	0
Q96S97	Myeloid-associated differentiation marker	MYADM	0	0	0	0	0	0	0	0	0	0	0	0	0	0	0	0	0	0	0	0	0	0	0	622800	1219200	824850	257910	0	867460	0	384270	861390	322640	155680	338040	91179	0	0	0	0	0	0	0	42188	0	57399	102750
Q96TA1	Protein Niban 2	NIBAN2	0	0	0	0	0	0	0	0	0	0	0	0	0	0	0	0	0	0	0	0	0	0	0	0	0	0	0	0	65871	0	0	0	0	0	0	0	0	0	0	0	0	0	0	0	0	0	0
Q99436	Proteasome subunit beta type-7	PSMB7	0	0	0	0	0	0	0	0	0	0	0	0	0	0	0	0	0	0	0	0	0	0	0	0	0	0	0	0	210420	0	0	0	0	0	0	0	0	0	0	0	0	0	0	0	0	0	0
Q99460	26S proteasome non-ATPase regulatory subunit 1	PSMD1	0	0	0	0	0	0	0	0	0	0	0	0	0	0	0	0	0	0	0	0	0	0	0	0	0	0	0	0	0	12943	0	0	0	0	0	0	0	0	0	0	0	0	0	0	0	0	0
Q99497	Parkinson disease protein 7	PARK7	0	0	0	0	0	0	26312	0	0	0	0	0	0	0	0	312940	0	0	0	0	0	0	0	0	0	0	0	0	17929	214490	0	0	0	0	0	0	0	0	0	0	0	0	0	28050	0	0	0
Q99536	Synaptic vesicle membrane protein VAT-1 homolog	VAT1	0	0	0	0	0	0	0	0	0	0	0	0	0	0	0	0	0	0	0	0	0	0	17255	0	0	68395	0	0	246760	0	0	40003	26432	0	0	0	0	0	0	0	0	0	0	1372700	659460	1722100	874320
Q99538	Legumain	LGMN	0	0	0	0	0	0	0	0	0	0	0	0	0	0	0	0	0	0	0	0	0	0	0	0	0	0	0	0	0	0	0	0	0	0	0	0	0	0	0	0	0	0	0	0	0	177070	0
Q99542	Matrix metalloproteinase-19	MMP19	0	0	0	0	0	0	0	0	0	0	0	0	0	0	0	0	0	0	0	0	0	0	0	0	0	0	0	0	0	0	0	0	0	0	0	0	0	0	0	0	0	0	0	0	0	0	669960
Q99623	Prohibitin-2	PHB2	0	0	0	0	0	0	0	0	0	0	0	0	0	0	0	0	0	0	0	0	0	0	0	0	0	0	0	0	0	0	0	0	0	0	0	0	0	0	0	0	0	0	0	0	0	417980	44212
Q99715	Collagen alpha-1(XII) chain	COL12A1	0	0	1109000	0	0	0	0	0	0	0	0	0	0	0	0	0	0	0	0	0	0	0	0	0	0	0	0	0	0	33134	0	0	0	0	1285500	0	0	0	0	0	0	0	0	71941	278300	3955400	573960
Q99798	Aconitate hydratase, mitochondrial	ACO2	0	0	0	0	0	0	0	0	0	0	0	0	0	0	0	207790	0	0	0	0	0	0	0	0	0	0	0	0	0	29204	0	0	0	0	0	0	0	0	0	0	0	0	0	0	0	55719	0
Q99829	Copine-1	CPNE1	0	0	0	0	0	0	0	0	0	0	0	0	0	0	0	0	0	0	0	0	0	0	0	0	0	0	0	0	0	16919	0	0	0	0	0	0	0	0	0	0	0	0	0	0	0	0	0
Q99832	T-complex protein 1 subunit eta	CCT7	0	0	0	0	0	0	0	0	0	0	0	0	0	0	0	0	0	0	0	0	0	0	46185	25093	0	50162	0	0	23477	0	0	0	473910	0	0	0	0	0	0	0	0	0	0	0	0	0	62957
Q99873	Protein arginine N-methyltransferase 1	PRMT1	0	0	0	0	0	0	0	0	0	0	0	0	0	0	0	0	0	0	0	0	0	0	0	0	0	0	0	0	28782	0	0	0	0	0	0	0	0	0	0	0	0	0	0	0	0	0	0
Q99972	Myocilin	MYOC	0	0	0	0	0	0	0	0	0	0	0	0	0	0	0	0	0	0	0	0	0	0	0	0	0	114830	0	0	0	0	0	0	0	0	109620	0	0	0	0	0	0	0	0	0	0	0	0
Q9BPX5	Actin-related protein 2/3 complex subunit 5-like protein	ARPC5L	0	0	0	0	0	0	0	0	0	0	0	0	0	0	0	0	0	0	0	0	0	0	0	0	0	0	0	0	0	93431	0	0	0	0	0	0	0	0	0	0	0	0	0	0	0	0	0
Q9BQ50	Three prime repair exonuclease 2	TREX2	0	0	0	0	0	0	0	0	0	0	0	0	0	0	0	0	0	0	0	0	0	0	0	0	0	0	0	0	0	444700	0	0	0	0	0	0	0	0	0	0	0	0	0	0	0	0	0
Q9BRX8	Peroxiredoxin-like 2A	PRXL2A	0	0	0	0	0	0	0	0	0	0	0	0	0	0	0	0	0	0	0	0	0	0	0	0	0	0	0	0	0	0	24099	0	0	0	0	0	0	0	0	0	0	0	0	18953	0	0	50907
Q9BS26	Endoplasmic reticulum resident protein 44	ERP44	0	0	0	0	0	0	0	0	0	0	0	0	0	0	0	0	0	0	0	0	0	0	0	0	0	0	0	0	25827	35526	0	0	0	0	0	0	0	0	0	0	0	0	0	0	0	0	0
Q9BSJ8	Extended synaptotagmin-1	ESYT1	0	0	0	0	0	0	0	0	0	0	0	0	0	0	0	0	0	0	0	0	0	0	0	0	0	0	0	0	0	0	0	0	0	0	0	0	0	0	0	0	0	0	0	0	0	113550	189080
Q9BTV4	Transmembrane protein 43	TMEM43	0	0	0	0	0	0	0	0	0	0	0	0	0	0	0	0	0	0	0	0	0	0	0	0	0	0	0	0	188160	0	0	0	0	0	0	0	0	0	0	0	0	0	0	47827	0	0	0
Q9BUA6	Myosin regulatory light chain 10	MYL10	0	0	0	0	0	0	0	0	0	0	0	0	0	0	0	653750	0	0	0	0	0	0	0	0	0	0	0	0	0	0	0	0	0	0	0	0	0	0	0	0	0	0	0	0	0	0	0
Q9BVC6	Voltage-gated monoatomic cation channel TMEM109	TMEM109	0	0	0	0	0	0	0	0	0	0	0	0	0	0	0	0	0	0	0	0	0	0	0	198450	155910	240940	0	0	0	77086	0	68636	0	0	161600	46286	0	0	0	0	0	0	0	0	0	0	0
Q9BX66	Sorbin and SH3 domain-containing protein 1	SORBS1	0	0	0	0	0	0	0	0	0	0	0	0	0	0	0	0	0	0	0	0	0	0	0	0	0	0	0	0	0	0	0	0	0	0	0	0	0	0	0	0	0	0	0	0	0	0	395330
Q9BXN1	Asporin	ASPN	0	0	0	0	0	0	0	0	0	0	0	0	0	0	0	0	0	0	0	0	0	0	0	0	0	0	0	0	0	0	0	0	0	0	0	0	0	0	0	0	0	0	0	1137300	371080	0	86761
Q9BXX0	EMILIN-2	EMILIN2	0	0	0	0	0	0	0	0	0	0	0	0	0	0	0	0	0	0	0	0	0	0	0	0	0	0	0	0	0	0	0	0	0	0	0	0	0	0	0	0	0	0	0	48294	14178	0	0
Q9GZM7	Tubulointerstitial nephritis antigen-like	TINAGL1	0	0	0	0	0	0	0	0	0	0	0	0	0	0	0	0	0	0	0	0	0	0	0	0	0	0	0	0	0	0	0	0	0	0	0	0	0	0	0	0	0	0	0	57549	0	0	64588
Q9GZZ8	Extracellular glycoprotein lacritin	LACRT	0	0	0	0	0	0	0	0	0	0	0	0	0	0	0	0	0	0	0	0	0	0	0	0	0	0	0	0	0	0	0	0	0	0	0	0	0	0	0	0	0	356400	0	0	0	0	0
Q9H0E2	Toll-interacting protein	TOLLIP	0	0	0	0	0	0	0	0	0	72901	23360	0	33118	0	0	0	0	0	0	0	0	0	0	0	0	0	29865	18009	167630	148450	0	0	0	0	0	0	22344	0	0	0	0	0	0	0	0	0	0
Q9H0P0	Cytosolic 5-nucleotidase 3A	NT5C3A	0	0	0	0	0	0	0	0	0	0	0	0	0	0	0	0	0	0	0	0	0	0	0	0	0	0	0	0	68625	0	0	0	0	0	0	0	0	0	0	0	0	0	0	0	0	0	0
Q9H0U4	Ras-related protein Rab-1B	RAB1B	0	0	0	0	0	0	0	0	0	0	0	0	0	0	0	0	0	0	0	0	0	0	0	0	0	0	0	0	44518	42735	0	0	0	0	0	0	0	0	0	0	0	0	0	40675	0	0	0
Q9H190	Syntenin-2	SDCBP2	0	0	0	0	0	0	0	0	0	0	0	0	0	0	0	0	0	0	0	0	0	0	0	0	0	0	0	0	611580	0	0	0	0	0	0	0	0	0	0	0	0	0	0	0	0	0	0
Q9H1E1	Ribonuclease 7	RNASE7	0	0	0	0	0	0	25783	0	0	0	35944	0	43988	0	0	0	0	13957	0	0	0	10426	0	0	0	30146	265350	0	1630900	28327	0	25034	0	30767	0	0	104170	0	0	35530	0	0	0	0	0	0	0
Q9H223	EH domain-containing protein 4	EHD4	0	0	0	0	0	0	0	0	0	0	0	0	0	0	0	0	0	0	0	0	0	0	0	0	0	0	0	0	0	0	0	0	0	0	0	0	0	0	0	0	0	0	0	0	0	49470	91076
Q9H270	Vacuolar protein sorting-associated protein 11 homolog	VPS11	0	0	0	0	0	0	0	0	0	0	0	0	0	0	0	0	0	0	0	0	0	0	0	0	0	0	4445900	0	0	0	0	0	3346700	0	0	0	0	0	0	0	0	2938000	0	0	0	0	0
Q9H299	SH3 domain-binding glutamic acid-rich-like protein 3	SH3BGRL3	0	0	0	0	0	0	0	0	0	0	0	0	0	0	0	0	0	0	0	0	0	0	0	0	0	0	0	0	0	25693	0	0	0	0	0	0	0	0	0	0	0	0	0	0	0	0	0
Q9H2C0	Gigaxonin	GAN	0	0	0	0	0	0	0	0	0	104130	0	0	0	0	0	0	0	0	0	0	0	0	0	0	0	0	0	0	36000	0	0	0	0	0	0	0	0	0	0	0	0	0	0	0	0	0	0
Q9H4G4	Golgi-associated plant pathogenesis-related protein 1	GLIPR2	0	0	0	0	0	0	0	0	0	0	0	0	0	0	0	0	0	0	0	0	0	0	0	0	41741	0	0	0	59384	0	0	44215	0	11463	0	0	0	0	0	0	0	0	0	0	0	86607	0
Q9H4M9	EH domain-containing protein 1	EHD1	0	0	0	0	0	0	0	0	0	0	0	0	0	0	0	0	0	0	0	0	0	0	0	0	0	0	0	0	26821	30298	0	0	0	0	0	0	0	0	0	0	0	0	0	26653	32667	0	66492
Q9H8H3	Thiol S-methyltransferase TMT1A	TMT1A	0	0	0	0	0	0	0	0	0	0	0	0	0	0	0	0	0	0	0	0	0	0	0	152510	0	0	0	0	51306	0	80327	120630	0	0	0	204170	0	0	0	0	0	0	0	162980	11834	0	0
Q9HB40	Retinoid-inducible serine carboxypeptidase	SCPEP1	0	0	0	0	0	0	0	0	0	24133	0	0	0	32700	0	0	0	44821	0	0	0	0	0	0	0	0	0	0	416270	50000	0	0	0	0	0	0	0	0	0	0	0	0	0	0	0	0	0
Q9HB71	Calcyclin-binding protein	CACYBP	0	0	0	0	0	0	0	0	0	0	0	0	0	0	0	0	0	0	0	0	0	0	0	0	0	0	0	0	0	0	0	0	0	0	0	0	0	0	0	0	0	0	0	0	0	0	0
Q9HBG4	V-type proton ATPase 116 kDa subunit a 4	ATP6V0A4	0	0	0	0	0	0	0	0	0	0	0	0	0	0	0	0	0	0	0	0	0	0	0	0	0	0	0	0	123590	0	0	0	0	0	0	0	0	0	0	0	0	0	0	0	0	0	0
Q9HBL0	Tensin-1	TNS1	0	0	0	0	0	0	0	0	0	0	0	0	0	0	0	0	0	0	0	0	0	0	0	0	0	0	0	0	0	0	30501	0	0	0	0	0	0	0	0	0	0	0	0	25428	29704	0	81905
Q9HC84	Mucin-5B	MUC5B	0	0	0	0	0	0	0	0	0	0	0	0	415830	0	0	0	0	0	0	0	0	0	0	0	0	0	0	0	0	0	0	0	0	0	0	0	0	0	0	0	0	0	0	0	0	0	0
Q9HCY8	Protein S100-A14	S100A14	0	0	0	0	0	36387	86424	131390	0	123030	190080	0	71226	109650	0	60738	69258	121060	95077	69642	37692	0	43346	0	0	52899	59778	267410	1682200	392270	222750	134580	129010	89996	25903	0	198460	10878	26094	27552	0	23355	15087	0	0	0	0
Q9HD45	Transmembrane 9 superfamily member 3	TM9SF3	0	0	0	0	0	0	0	0	0	0	0	0	0	0	0	0	0	0	0	0	0	0	0	0	0	0	0	0	0	15877	0	0	0	0	0	0	0	0	0	0	0	0	0	0	0	0	0
Q9HDC9	Adipocyte plasma membrane-associated protein	APMAP	0	0	0	0	0	0	0	0	0	0	0	0	0	0	0	0	0	0	0	0	0	0	0	0	0	0	0	0	0	0	0	0	0	0	0	0	0	0	0	0	0	0	0	164880	90623	0	0
Q9NP55	BPI fold-containing family A member 1	BPIFA1	0	0	0	0	0	0	0	0	0	0	0	0	305470	0	0	0	0	0	0	0	0	0	0	0	0	0	0	0	0	0	0	0	0	0	0	0	0	0	0	0	0	0	0	0	0	0	0
Q9NP98	Myozenin-1	MYOZ1	0	0	0	0	0	0	0	0	0	0	0	0	0	0	0	626440	0	0	0	0	0	102310	0	34658	0	79611	0	0	0	0	0	0	0	0	216880	0	0	0	0	0	0	0	0	0	0	0	0
Q9NPC6	Myozenin-2	MYOZ2	0	0	0	0	0	0	0	0	0	0	0	0	0	0	0	29884	0	0	0	0	0	0	0	0	0	0	0	0	0	0	0	0	0	0	0	0	0	0	0	0	0	0	0	0	0	0	0
Q9NQC3	Reticulon-4	RTN4	0	0	0	0	0	0	0	0	0	0	0	0	0	0	0	50176	0	0	0	0	0	0	0	0	0	53208	0	0	287890	0	0	0	0	0	98080	0	0	0	0	0	0	0	0	0	0	24442	447530
Q9NRN5	Olfactomedin-like protein 3	OLFML3	0	0	0	0	0	0	0	0	0	0	0	0	0	0	0	0	0	0	0	0	0	0	0	0	0	0	0	0	0	0	0	0	0	0	0	0	0	0	0	0	0	0	0	48142	0	108950	52970
Q9NSA2	Potassium voltage-gated channel subfamily D member 1	KCND1	37324	0	0	32336	0	0	0	0	0	0	0	0	0	0	0	0	0	0	0	0	0	0	0	0	0	0	0	0	0	0	0	0	0	0	0	0	0	0	0	0	0	0	0	0	0	0	0
Q9NSE4	Isoleucine--tRNA ligase, mitochondrial	IARS2	0	0	0	0	0	0	0	0	0	0	0	0	0	0	0	0	0	0	0	0	0	0	0	0	0	0	0	0	0	0	0	0	0	0	0	0	0	0	0	0	0	0	0	0	0	0	0
Q9NUV9	GTPase IMAP family member 4	GIMAP4	0	0	0	0	0	0	0	0	0	0	0	0	0	0	0	0	0	0	0	0	0	0	0	0	0	0	0	0	0	0	0	0	0	0	0	0	0	0	0	0	0	0	0	0	0	0	0
Q9NVA2	Septin-11	SEPTIN11	0	0	0	0	0	0	0	0	0	0	0	0	0	0	0	0	0	0	0	0	0	0	0	0	0	0	0	0	0	0	0	0	0	0	0	0	0	0	0	0	0	0	0	165180	48365	118940	0
Q9NVD7	Alpha-parvin	PARVA	0	0	0	0	0	0	0	0	0	0	0	0	0	0	0	0	0	0	0	0	0	0	0	0	0	0	0	0	0	0	0	0	0	0	0	0	0	0	0	0	0	0	0	36613	53065	67274	0
Q9NX02	NACHT, LRR and PYD domains-containing protein 2	NLRP2	0	0	0	0	0	0	0	0	0	0	0	0	0	0	0	0	0	0	0	0	0	0	0	0	0	0	0	0	0	7078.8	0	0	0	0	0	0	0	0	0	0	0	0	0	0	0	0	0
Q9NZ01	Very-long-chain enoyl-CoA reductase	TECR	0	0	0	0	0	0	0	0	0	0	0	0	0	0	0	0	0	0	0	0	0	0	0	0	0	0	34844	0	33123	5576.9	0	0	0	0	0	0	0	0	0	0	0	0	0	0	0	0	0
Q9NZH6	Interleukin-37	IL37	0	0	0	0	0	0	0	0	0	0	0	0	0	0	0	0	0	0	0	0	0	0	0	0	0	0	427820	0	0	31440	0	0	0	0	0	0	0	0	0	0	0	0	0	0	0	0	0
Q9NZH8	Interleukin-36 gamma	IL36G	0	0	0	0	0	0	69368	28122	0	0	0	0	45333	46433	0	0	0	33223	61285	0	0	0	0	0	0	0	0	0	40325	664840	37475	0	0	0	0	24602	46873	0	0	0	0	0	0	0	0	0	0
Q9NZM1	Myoferlin	MYOF	0	0	0	0	0	0	0	0	0	0	0	0	0	0	0	0	0	0	0	0	0	0	0	0	0	0	0	0	0	0	0	0	0	0	0	0	0	0	0	0	0	0	0	0	0	252680	0
Q9NZN4	EH domain-containing protein 2	EHD2	0	0	0	0	0	0	0	0	0	0	0	0	0	0	0	0	0	0	0	0	0	0	0	103840	0	23259	75061	0	109320	0	335090	21580	0	0	0	170080	0	0	0	0	0	0	0	474260	173720	92430	1812100
Q9NZQ9	Tropomodulin-4	TMOD4	0	0	0	0	0	0	0	0	0	0	0	0	0	0	0	264850	0	0	0	0	0	0	0	0	0	0	0	0	0	0	0	0	0	0	0	0	0	0	0	0	0	0	0	0	0	0	0
Q9NZT1	Calmodulin-like protein 5	CALML5	39564	49331	0	172980	0	3318300	3589300	16027000	44718	3686500	2896400	1050000	4899300	3529400	1106600	2639300	1164900	2769800	4891000	1303200	1788400	2452500	1061600	1014900	607260	1696500	4535400	8893800	37782000	25921000	2682600	848580	1812200	2419400	997290	1227300	8976400	470960	997950	1100500	519290	805740	766590	223690	61761	0	0
Q9P003	Protein cornichon homolog 4	CNIH4	0	0	0	0	0	0	0	0	0	0	0	0	0	0	0	0	0	0	0	0	0	0	0	0	0	0	0	0	37967	0	0	0	0	0	0	0	0	0	0	0	0	0	0	0	0	0	0
Q9P0V9	Septin-10	SEPTIN10	0	0	0	0	0	0	0	0	0	0	0	0	0	0	0	0	0	0	0	0	0	0	0	0	0	0	0	0	0	0	0	0	0	0	0	0	0	0	0	0	0	0	0	30460	0	0	0
Q9P2E9	Ribosome-binding protein 1	RRBP1	0	0	0	0	0	0	0	0	0	0	0	0	0	0	0	0	0	0	0	0	0	0	0	0	0	0	0	0	0	0	0	0	0	0	0	0	0	0	0	0	0	0	0	0	0	962860	209370
Q9UBF9	Myotilin	MYOT	0	0	0	0	0	0	0	0	0	0	0	0	0	0	0	138180	0	0	0	0	0	0	0	0	0	0	0	0	0	0	0	0	0	0	120510	0	0	0	0	0	0	0	0	0	0	0	0
Q9UBG3	Cornulin	CRNN	0	0	0	0	0	0	0	0	0	0	1326900	0	16503	0	0	0	0	0	0	128190	0	0	0	0	0	0	0	236170	23261	0	0	0	0	0	0	0	0	0	0	0	0	0	0	0	0	0	0
Q9UBM7	7-dehydrocholesterol reductase	DHCR7	0	0	0	0	0	0	0	0	0	0	0	0	0	0	0	0	0	0	0	0	0	0	0	0	0	0	0	0	245390	0	0	0	0	0	0	0	0	0	0	0	0	0	0	0	0	0	0
Q9UBX5	Fibulin-5	FBLN5	0	0	0	0	0	0	0	0	0	0	0	0	0	0	0	0	0	0	0	0	0	0	0	0	0	0	0	0	0	0	0	0	0	0	0	0	0	0	0	0	0	0	0	0	0	0	0
Q9UBX7	Kallikrein-11	KLK11	0	0	0	0	0	0	0	0	0	0	0	0	0	0	0	0	0	0	0	0	0	0	0	0	0	0	0	0	0	37952	0	0	0	0	0	0	0	0	0	0	0	0	0	0	0	0	0
Q9UFN0	Protein NipSnap homolog 3A	NIPSNAP3A	0	0	0	0	0	0	0	0	0	0	0	0	0	0	0	0	0	0	0	0	0	0	0	0	0	0	0	0	211640	9657.7	0	0	0	0	0	0	0	0	0	0	0	0	0	0	0	0	0
Q9UGL9	Cysteine-rich C-terminal protein 1	CRCT1	0	0	0	0	0	0	0	0	0	28909	0	0	0	0	0	0	0	0	0	0	0	0	0	0	0	0	0	0	0	0	0	0	0	0	0	0	0	0	0	0	0	0	0	0	0	0	0
Q9UGM3	Deleted in malignant brain tumors 1 protein	DMBT1	0	0	0	0	0	0	0	0	99293	0	0	0	438480	0	0	0	0	0	30808	0	0	0	0	0	0	76729	29024	63939	28235	22930	157570	39801	0	0	0	42237	54576	0	0	0	0	0	0	0	0	0	0
Q9UHG3	Prenylcysteine oxidase 1	PCYOX1	0	0	0	0	0	0	0	0	0	0	0	0	0	0	0	0	0	0	0	0	0	0	0	0	0	0	0	0	277490	59773	65488	0	0	0	0	0	0	0	0	0	0	0	0	53481	0	0	0
Q9UI42	Carboxypeptidase A4	CPA4	0	0	0	0	0	87772	122020	59013	0	79596	0	0	40458	192310	0	0	0	0	93790	0	0	42713	0	0	33570	34156	397860	162380	191620	632780	0	0	0	0	0	0	0	0	0	0	0	0	0	0	0	0	0
Q9UIV8	Serpin B13	SERPINB13	0	0	0	0	0	0	0	57416	0	0	0	0	47033	26383	0	0	0	0	0	0	0	0	0	0	0	0	0	0	582300	51835	0	0	0	0	0	0	0	0	0	0	0	0	0	0	0	0	0
Q9UJU6	Drebrin-like protein	DBNL	0	0	0	0	0	0	0	0	0	0	0	0	0	0	0	0	0	0	0	0	0	0	0	0	0	0	0	0	56168	0	0	0	0	0	0	0	0	0	0	0	0	0	0	0	0	0	40608
Q9UJZ1	Stomatin-like protein 2, mitochondrial	STOML2	0	0	0	0	0	0	0	0	0	0	0	0	0	0	0	0	0	0	0	0	0	0	0	0	0	0	0	0	0	0	0	0	0	0	0	0	0	0	0	0	0	0	0	0	0	39719	76393
Q9UKK9	ADP-sugar pyrophosphatase	NUDT5	0	0	0	0	0	0	14319	0	0	38814	0	0	0	0	0	0	0	0	0	0	0	0	0	0	0	0	0	0	12966	0	0	0	0	0	0	0	0	0	0	0	0	0	0	0	0	0	0
Q9UKR3	Kallikrein-13	KLK13	0	0	0	0	0	0	0	0	0	0	0	0	0	0	0	0	0	0	0	0	0	0	0	0	0	0	0	0	1087900	0	0	0	0	0	0	0	0	0	0	0	0	0	0	0	0	0	0
Q9UKX2	Myosin-2	MYH2	0	0	0	0	0	0	0	609720	0	0	0	0	0	0	0	20902000	0	0	0	0	1726300	958890	0	2220800	0	2868500	0	0	0	0	0	0	0	0	10033000	0	0	0	0	0	0	0	0	0	0	0	0
Q9UKX3	Myosin-13	MYH13	0	0	0	0	0	0	0	0	0	0	0	0	0	0	0	0	0	0	0	0	143690	232130	0	0	0	239870	0	0	0	0	0	0	0	0	224660	0	0	0	0	0	0	0	0	0	0	0	0
Q9UL25	Ras-related protein Rab-21	RAB21	0	0	0	0	0	0	0	0	0	0	0	0	0	0	0	0	0	0	0	0	0	0	0	0	0	0	0	19219	52920	0	0	0	0	0	0	0	0	0	0	0	0	0	0	0	0	0	0
Q9ULE4	Protein FAM184B	FAM184B	0	0	0	0	0	0	145020	195110	0	0	0	0	0	0	0	0	0	0	0	0	0	0	276540	0	0	0	0	0	0	0	0	0	0	0	81330	219240	0	0	0	0	0	0	0	0	0	0	0
Q9UM00	Calcium load-activated calcium channel	TMCO1	0	0	0	0	0	0	0	0	0	0	0	0	0	0	0	0	0	0	0	0	0	0	0	0	0	0	0	0	10921	0	0	0	0	0	0	0	0	0	0	0	0	0	0	0	0	0	0
Q9UM54	Unconventional myosin-VI	MYO6	0	0	0	0	0	0	0	0	0	0	0	0	0	0	0	0	0	0	0	0	0	0	0	0	0	0	0	0	138400	43198	0	0	0	0	0	0	0	0	0	0	0	0	0	0	0	0	0
Q9UN36	Protein NDRG2	NDRG2	0	0	0	0	0	0	0	0	0	0	0	0	0	0	0	0	0	0	0	0	0	0	0	0	0	0	0	0	122130	0	0	0	0	0	0	0	0	0	0	0	0	0	0	0	0	0	0
Q9UN76	Sodium- and chloride-dependent neutral and basic amino acid transporter B(0+)	SLC6A14	0	0	0	0	0	0	0	0	0	0	0	0	0	0	0	0	0	0	0	0	0	0	0	0	0	0	0	0	298500	0	0	0	0	0	0	0	0	0	0	0	0	0	0	0	0	0	0
Q9UNM6	26S proteasome non-ATPase regulatory subunit 13	PSMD13	0	0	0	0	0	0	0	0	0	0	0	0	0	0	0	0	0	0	0	0	0	0	0	0	0	0	0	0	0	19498	0	0	0	0	0	0	0	0	0	0	0	0	0	0	0	0	0
Q9UQ80	Proliferation-associated protein 2G4	PA2G4	0	0	0	0	0	0	0	0	0	0	0	0	0	0	0	0	0	0	0	0	0	0	0	0	0	0	0	0	0	34297	0	0	0	0	0	0	0	0	0	0	0	0	0	0	0	0	0
Q9Y251	Heparanase;Heparanase 8 kDa subunit	HPSE	0	0	0	0	0	0	0	0	0	0	0	0	0	0	0	0	0	0	0	0	0	0	0	0	0	0	0	0	100750	133540	0	0	0	0	0	0	0	0	0	0	0	0	0	0	0	0	0
Q9Y262	Eukaryotic translation initiation factor 3 subunit L	EIF3L	0	0	0	0	0	0	0	0	0	0	0	0	0	0	0	0	0	0	0	0	0	0	0	0	0	0	0	0	0	24250	0	0	0	0	0	0	0	0	0	0	0	0	0	0	0	161090	0
Q9Y277	Voltage-dependent anion-selective channel protein 3	VDAC3	0	0	0	0	0	0	0	0	0	0	0	0	0	0	0	0	0	0	0	0	0	0	0	0	0	0	0	0	148730	0	0	0	0	0	0	0	0	0	0	0	0	0	0	89690	0	0	0
Q9Y281	Cofilin-2	CFL2	0	0	0	0	0	0	0	0	0	0	0	0	0	0	0	0	0	0	0	0	0	0	0	0	0	0	0	0	0	0	0	0	0	0	0	0	0	0	0	0	0	0	0	0	0	59728	130890
Q9Y2E5	Epididymis-specific alpha-mannosidase	MAN2B2	0	0	0	0	0	0	0	0	0	0	0	0	0	0	0	0	0	0	0	0	0	0	0	0	0	0	0	0	27671	0	0	0	0	0	0	0	0	0	0	0	0	0	0	0	0	0	0
Q9Y2L1	Exosome complex exonuclease RRP44	DIS3	0	0	0	0	0	385600	0	0	0	1140700	0	0	0	1209600	0	1214400	535700	1386900	830360	1069400	0	2857600	2898600	2033000	0	1647200	5741000	5856500	1927300	2919400	2258300	1757800	0	4249900	794640	0	3223300	0	1009200	1564100	0	0	938200	0	0	0	0
Q9Y2Q3	Glutathione S-transferase kappa 1	GSTK1	0	0	0	0	0	0	0	0	0	0	0	0	0	0	0	0	0	0	0	0	0	0	0	0	0	0	0	0	0	0	0	0	0	0	0	0	0	0	0	0	0	0	0	0	0	0	69229
Q9Y315	Deoxyribose-phosphate aldolase	DERA	0	0	0	0	0	0	0	0	0	0	0	0	0	0	0	0	0	0	0	0	0	0	0	0	0	0	0	0	29284	0	0	0	0	0	0	0	0	0	0	0	0	0	0	0	0	0	0
Q9Y337	Kallikrein-5	KLK5	0	0	0	0	0	0	16293	0	0	0	0	0	64566	0	0	0	0	0	0	0	0	0	0	0	0	0	0	0	63338	0	0	0	0	0	0	0	0	0	0	0	0	0	0	0	0	0	0
Q9Y3Q3	Transmembrane emp24 domain-containing protein 3	TMED3	0	0	0	0	0	0	0	0	0	0	0	0	0	0	0	0	0	0	0	0	0	0	0	0	0	0	0	0	100910	0	0	0	0	0	0	0	0	0	0	0	0	0	0	0	0	0	0
Q9Y3R4	Sialidase-2	NEU2	0	0	0	0	0	0	0	0	0	0	0	0	0	0	0	0	0	0	0	0	0	0	0	0	0	0	0	0	127900	28368	0	0	22133	0	0	0	0	0	0	0	0	0	0	0	0	0	0
Q9Y3U8	Large ribosomal subunit protein eL36	RPL36	0	0	0	0	0	0	0	0	0	0	0	0	0	0	0	0	0	0	0	0	0	0	0	0	0	36804	0	0	0	0	0	0	0	0	97406	0	0	0	0	0	0	0	0	244240	130760	0	0
Q9Y446	Plakophilin-3	PKP3	0	0	0	0	0	0	0	0	0	0	0	0	0	0	0	0	0	0	0	0	0	0	0	0	0	0	0	0	484510	296780	0	0	0	0	0	0	0	0	0	0	0	0	0	0	0	0	0
Q9Y490	Talin-1	TLN1	0	0	0	0	0	0	0	0	0	0	0	0	0	0	0	0	0	0	0	0	0	0	0	0	0	0	0	0	0	0	0	0	0	0	0	0	0	0	0	0	0	0	0	1273400	433010	1011300	663910
Q9Y4G6	Talin-2	TLN2	0	0	0	0	0	0	0	0	0	0	0	0	0	0	0	0	0	0	0	0	0	0	0	0	0	0	0	0	0	0	0	0	0	0	0	0	0	0	0	0	0	0	0	53049	0	0	99702
Q9Y4P3	Transducin beta-like protein 2	TBL2	0	0	0	0	0	0	0	0	0	0	0	0	0	0	0	0	0	0	0	0	0	0	0	0	0	0	0	0	0	0	0	0	0	0	0	0	0	0	0	0	0	0	0	0	0	43463	0
Q9Y5F7	Protocadherin gamma-C4	PCDHGC4	0	0	0	0	0	0	0	418250	0	50984	86488	0	0	0	0	0	0	0	0	0	0	0	0	0	0	0	0	0	0	0	0	0	0	0	0	0	0	0	0	30403	0	0	0	0	86111	0	0
Q9Y5Z4	Heme-binding protein 2	HEBP2	0	0	0	0	0	0	0	0	0	0	0	0	0	0	0	0	0	0	0	0	0	0	0	0	0	0	0	0	32303	27535	0	0	0	0	0	0	0	0	0	0	0	0	0	0	0	0	23492
Q9Y623	Myosin-4	MYH4	0	0	0	0	0	0	0	77290	0	0	0	0	0	0	0	43910000	131460	0	0	0	109120	19723	0	46225	0	0	0	0	0	0	0	0	0	0	126740	0	0	0	0	0	0	0	0	0	0	0	0
Q9Y6C2	EMILIN-1	EMILIN1	0	0	0	0	0	0	0	0	0	0	0	0	0	0	0	0	0	0	0	0	0	0	0	0	106180	50809	24567	0	0	0	0	0	0	23153	0	0	0	0	0	0	0	0	0	0	52446	543540	196830
Q9Y6M9	NADH dehydrogenase [ubiquinone] 1 beta subcomplex subunit 9	NDUFB9	0	0	0	0	0	0	0	0	0	0	0	0	0	0	0	0	0	0	0	0	0	0	0	0	0	10173	0	0	0	0	0	0	0	0	0	0	0	0	0	0	0	0	0	0	0	0	0
Q9Y6N5	Sulfide:quinone oxidoreductase, mitochondrial	SQOR	0	0	0	0	0	0	0	0	0	33686	0	0	0	0	0	0	0	0	0	0	0	0	0	0	0	0	0	0	0	44159	0	0	0	0	0	0	0	0	0	0	0	0	0	0	0	95464	0
Q9Y6W5	Actin-binding protein WASF2	WASF2	0	0	0	0	0	0	0	0	0	0	0	0	0	0	0	0	0	0	0	0	0	0	0	0	0	0	0	0	0	0	0	0	0	0	0	0	0	0	0	0	0	0	0	23784	0	0	0
[truncated: 1 more columns]

## Sheet: Oncoprotein
Oncogene
ALOX12B
IDH1
COL1A1
LMNA
HSP90AA1
RRAS
H1-4
ELN
NQO1
UBA1
CALR
SERPINB3
IQGAP1
IDH2
PSMB2
CDC42
RPS15
PRKDC
GNAS
NCSTN

## Sheet: Tumor suppressor
Tumor suppressor gene
SERPINB3
ALDH2
ALOX12B
ACTG1
MYH11
HLA-C
NPM1
H1-5
RPL5
FH
ATP6V1B2
SDHA
CDH1
H1-3
HLA-B
DIS3
CTNNA1
PARP1
PRKDC

## Sheet: Cancer biomarker
Cancer biomarker
COL1A1
LMNA
HSP90AA1
NQO1
UBA1
CALR
SERPINB3
PRKDC
GNAS
TFRC
HSP90AB1
PARP1
CDH1
EZR
CD36
DDIT3
SERPINB4
YWHAE
CLIC1
KLK10
HIP1R
LDHA
CYB5R3
GSR
SOD1
CP
F13A1
HP
PLG
SERPINA1
SERPINA3
A2M
CSTA
PIGR
CRYAB
APOA1
APOE
APOA2
APOC3
FGA
FGB
FGG
FN1
ORM1
AHSG
TTR
TF
LTF
FTL
FTH1
VTN
CAT
ALDOA
CSTB
ANXA1
SOD2
VWF
HSPB1
APOD
S100A8
SERPINB2
MPO
ALPL
KRT18
S100A9
ENO1
GPI
EPHX1
DBI
GPX1
CTSD
DCN
CTSB
COL1A2
ELANE
CD14
COL4A2
ITGA5
GSTP1
TPM1
ANXA4
HMOX1
CTSH
LTA4H
ALDOC
C7
HSPD1
CLU
LAMC1
HSPA8
SLC2A1
COL6A1
CKB
XRCC6
EEF2
PKM
HSP90B1
JUP
FABP4
ACP3
CD44
PECAM1
NAGA
GJA1
DES
LGALS3
IL1RN
TYMP
ANXA7
RPS3
TNC
AZGP1
APEX1
CANX
S100A2
LCN1
S100A7
YWHAB
SFN
PRDX2
HSPA4
TIMP3
SERPINF1
COL18A1
MDH1
NAMPT
FASN
KLK7
ANXA11
ACLY
GAS1
TPI1
HSPE1
DAD1
YBX1
CSNK2B
FABP5
TAGLN
AKAP12
CAV1
C1QBP
MFGE8
ASPH
BLMH
ITIH4
MVP
SEPTIN2
POSTN
CST6
CDC37
FSCN1
AOC3
KLK6
LGMN
KLK11
KLK13
KLK5

## Sheet: Membrane protein
Membrane protein
GNAS
CDH1
PTPRK
PGRMC2
EPB41L2
GJB3
CRYAB
GYPA
THY1
GPI
HMOX1
SLC2A1
SLC5A1
CD44
PECAM1
GJA1
NT5E
STOM
CD34
AQP1
MCAM
SLC16A1
ATP12A
CD81
LRP1
IQGAP2
ITGA7
DSC3
CYBRD1
CD109
TMEM40
APMAP
MYOF
SLC6A14
PCDHGC4
UBA1
NCSTN
HLA-B
TFRC
RPN1
HLA-C
CD36
KTN1
MGST3
ATP2A1
NPC1
RER1
THAP12
PLIN1
NDUFS2
CS
SEC22B
ATP6AP2
TRPM2
RTN3
LETM1
CYB5R3
MT-CO1
MT-CO2
AGT
PIGR
IGHG1
IGHG2
IGHG3
IGHG4
IGHM
IGHA1
IGHA2
HBD
SLC4A1
MT-ND4
RPN2
ATP1B1
SLC25A5
ALPL
ITGA5
STS
TPM1
GAA
MGST1
LAMP1
SLC25A4
SLC25A6
LAMP2
CPM
ACP3
MAOA
RYR1
ATP5PB
MAOB
ATP6V0C
CANX
GJB2
RPL9
ACSL1
AGL
DDOST
SSR1
LMAN1
TMED10
ATP1A2
SSR4
BCAP31
CAV2
ALDH3A2
CTSC
ATP5MF
TMEM33
S100A10
DAD1
RPS15A
SLC25A3
REEP5
DSG1
SLC25A11
CAV1
GFPT1
CKAP4
ARHGAP1
DSC1
ASPH
PSMD2
SGCG
NNT
ASAH1
MLEC
NAA25
PDIA6
TMED2
DHCR24
MSMO1
SYPL1
PTGIS
FAM187B
HSD17B12
ATL3
RETSAT
PLB1
GDPD3
MTDH
KLB
PLD3
SDR16C5
SCCPDH
STT3B
HM13
TTN
ATP6V0A1
ATP2A3
TMBIM1
LRRC59
TMEM45B
RCN3
PERP
CFAP54
MYADM
PSMD1
PRXL2A
ESYT1
TMEM43
TMEM109
ATP6V0A4
TM9SF3
RTN4
KCND1
GIMAP4
PARVA
TECR
CNIH4
RRBP1
DHCR7
SERPINB13
TMCO1
NDRG2
EIF3L
TMED3

## Sheet: Secreted protein
Secreted protein
COL1A1
ELN
TFRC
IGHV3-15
IGHV1-18
COL6A6
A2ML1
LAMA5
KLK10
CILP
CREG1
CP
F13A1
HP
CFD
PLG
CFB
SERPINC1
SERPINA1
SERPINA3
AGT
A2M
C3
C5
CST4
KNG1
JCHAIN
PIGR
IGKC
IGHG1
IGHG2
IGHG3
IGHG4
IGHM
IGHA1
IGHA2
COL3A1
COL4A1
APOA1
APOE
APOA2
APOC3
FGA
FGB
FGG
APCS
C1QC
C9
APOH
FN1
AMBP
ORM1
AHSG
TTR
GC
TF
LTF
HPX
STATH
C4BPA
VTN
ANXA1
APOB
HRG
A1BG
VWF
APOD
S100A8
SERPING1
SERPIND1
COL5A2
IGKV2-30
IGKV4-1
S100A9
APOA4
GPI
LPL
GPX1
PROS1
CTSD
DCN
CTSB
COL1A2
ELANE
SOD3
CD14
COL4A2
CFH
CST2
LGALS1
PAEP
C1S
C4B
SLURP2
PRB4
C7
CLU
LAMC1
COL6A1
COL6A2
COL6A3
PIP
NID1
IDE
CPA3
ACP3
CD44
LGALS3
IL1RN
ORM2
ITIH2
ITIH1
OGN
COL5A1
BGN
TNXB
GPX3
CA6
PPIB
CMA1
PRTN3
TNC
AZGP1
HMGB2
DPP4
SERPINB1
LCN1
S100A7
SFN
PRSS3
FBN1
TIMP3
SERPINF1
COL15A1
COL18A1
NAMPT
KLK7
LUM
PRELP
COPA
LAMB2
KRTDAP
LYZ
PPIA
LCN2
S100A12
DCD
FBLN2
HSPG2
NUCB1
PRB3
COL14A1
FMOD
C1QBP
DPT
MFGE8
EFEMP1
ITIH4
POSTN
CDSN
TGFBI
CST6
LAMA4
PRR4
ECM1
GDF6
PSAPL1
SBSN
OLFML1
ACP7
PODN
ABI3BP
CILP2
AEBP1
SERPINA12
BPIFB1
DNASE1L2
KLK6
ZG16B
MUCL1
CPB2
MMP19
COL12A1
MYOC
PRXL2A
ASPN
EMILIN2
TINAGL1
LACRT
RNASE7
SCPEP1
MUC5B
BPIFA1
OLFML3
IL37
IL36G
FBLN5
KLK11
DMBT1
CPA4
KLK13
HPSE
MAN2B2
KLK5
EMILIN1

## Sheet: Cytokine
Cytokine
GPI
NAMPT
GDF6
IL37
IL36G

## Sheet: Growth factor
Growth factor
ACTG1
MYH11
HLA-C
NPM1
H1-5
RPL5
FH
ATP6V1B2
SDHA
CDH1
H1-3
HLA-B
DIS3
CTNNA1
PARP1
PRKDC
